# Supplementary material for: Analysis of chi angle distributions in isolated amino acids via multiplet fitting of proton scalar couplings
Source: Copernicus journal article supplement (doi:10.5194/mr-2024-7), 2024-04-09

$^1\text{H}-^1\text{H}^3\text{J}(\text{Hz})$ 

4 6 8 10

Val  
Leu  
Ile  
Met  
Thr  
Ser  
Cys  
Asn  
Gln  
Asp  
Glu  
His  
Lys  
Arg  
Pro  
Tyr  
Phe  
Trp

● HA-HB ● HB-HG ● HG-HD ● HD-HE

○ 1D FitNMR  
+ Dunbrack  
× Bundi et al.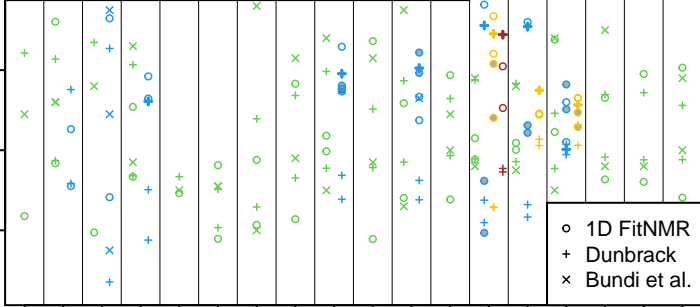

Supplement: Supplementary file [file mr-2024-7-AC1-supplement.pdf]
