# Supplementary figures and images for: Analysis of chi angle distributions in isolated amino acids via multiplet fitting of proton scalar couplings
Source: Copernicus journal article supplement (doi:10.5194/mr-2024-7), 2024-04-09

HA

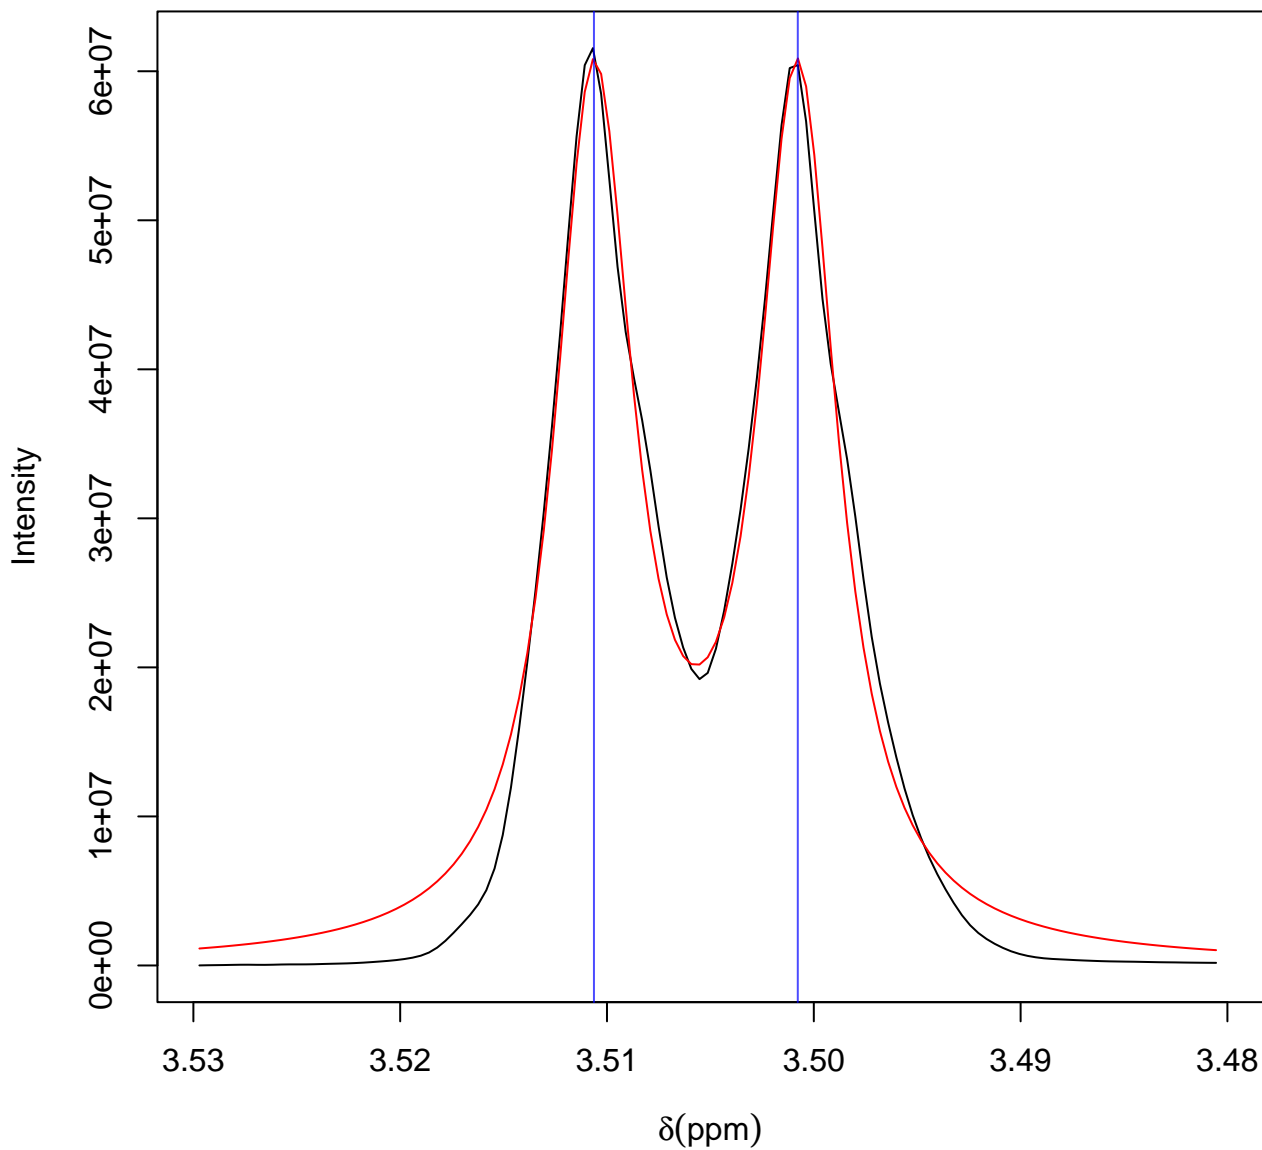

**HB**

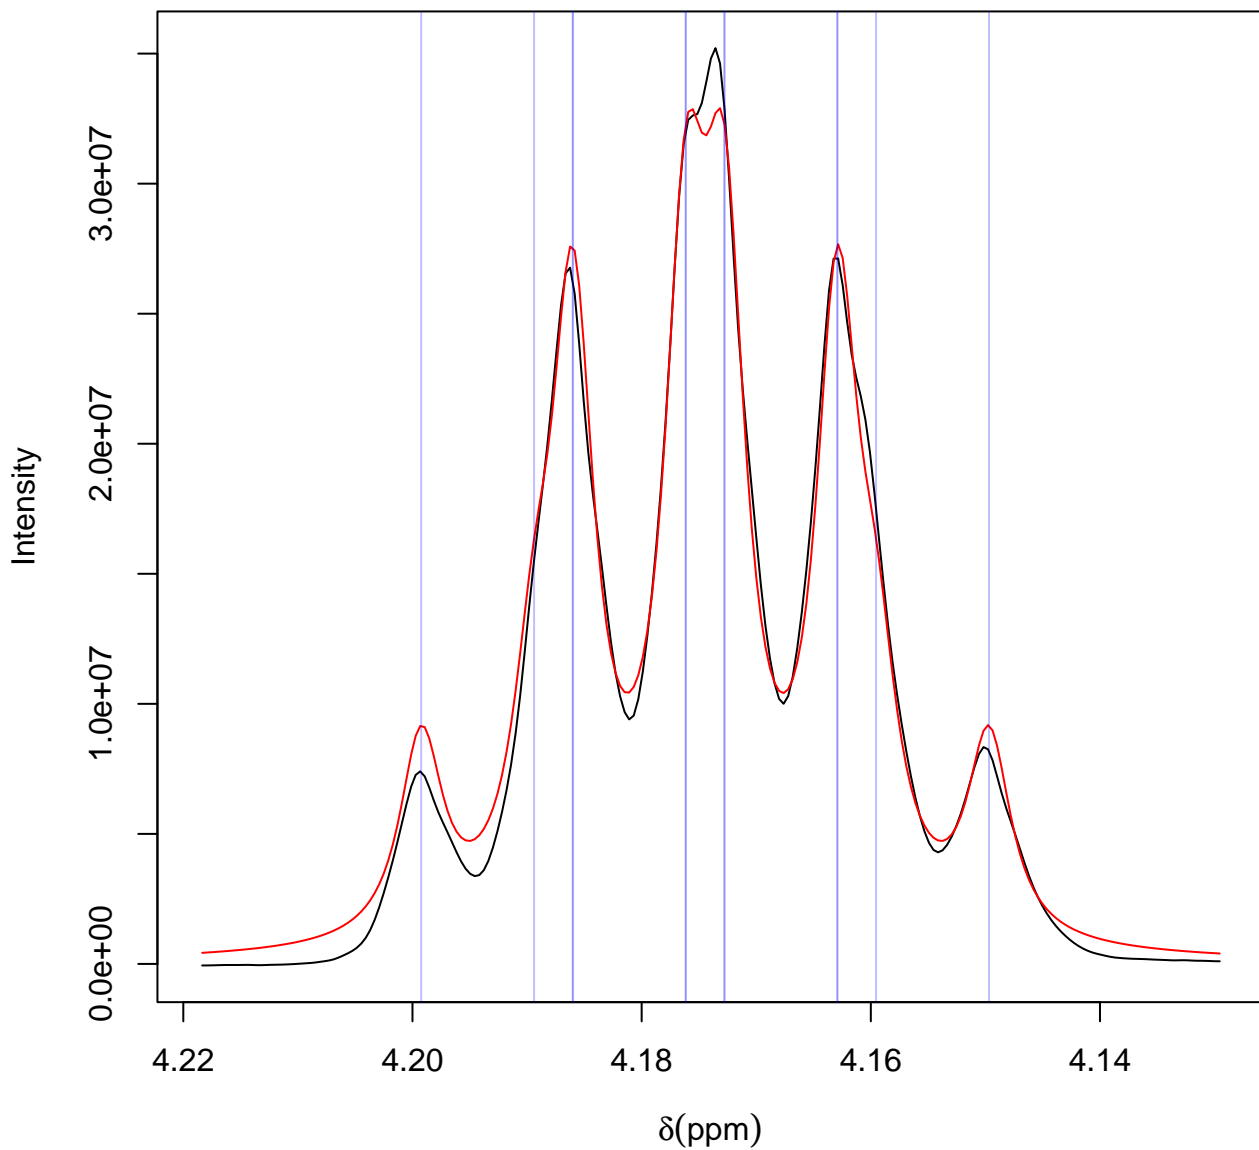

# HG2

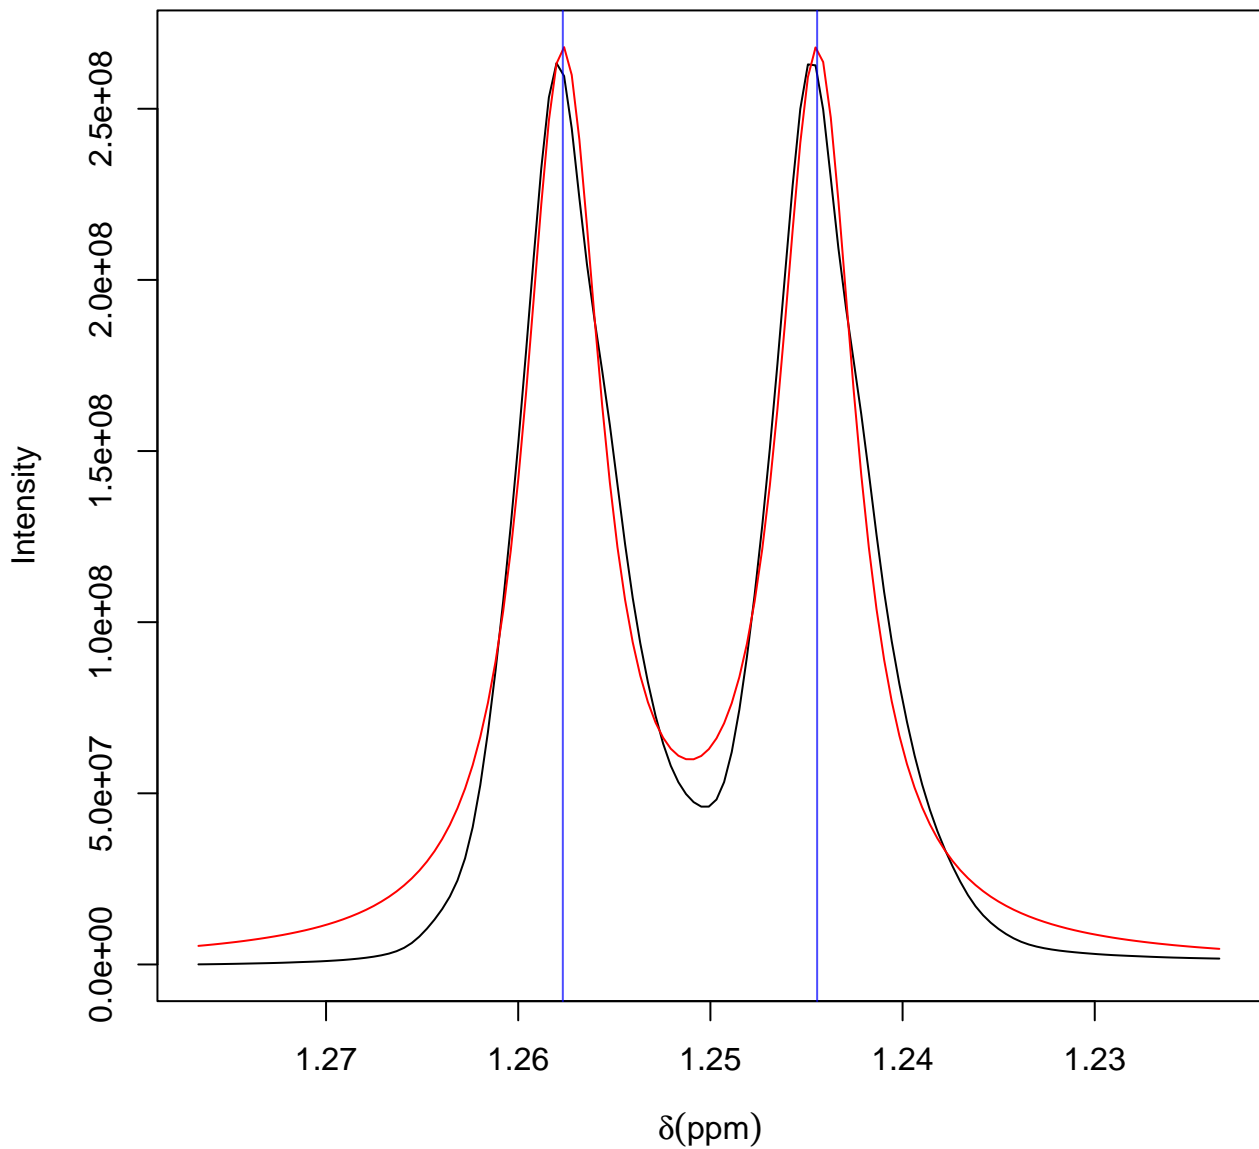

Supplement: Supplementary file 1 [file mr-2024-7-supplement.zip]

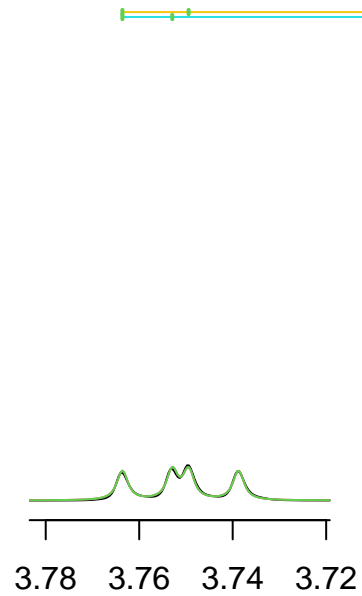

HA

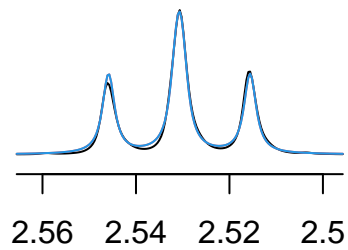

HG2/3

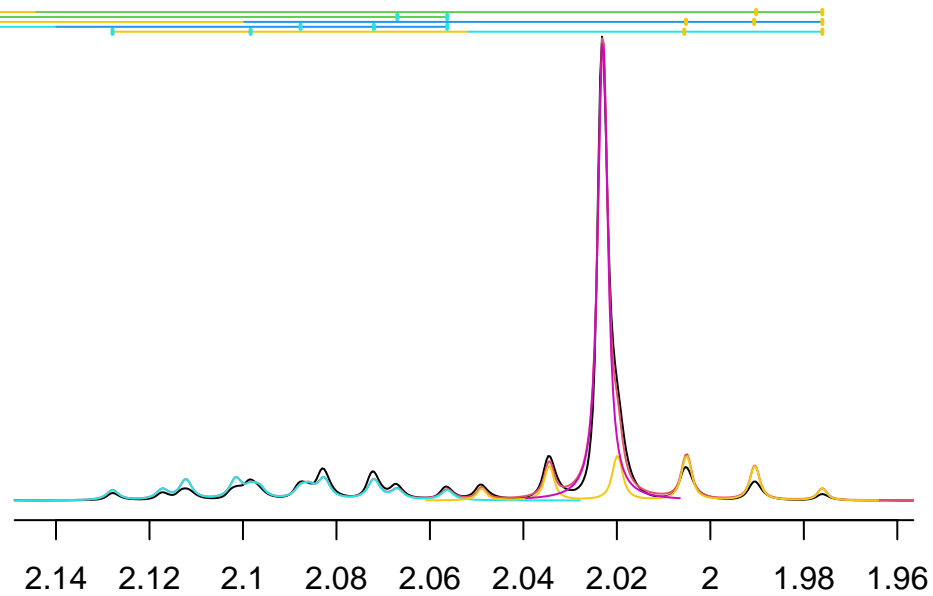

HB2

HE HB3

Supplement: Supplementary file 2 [file mr-2024-7-supplement.zip]

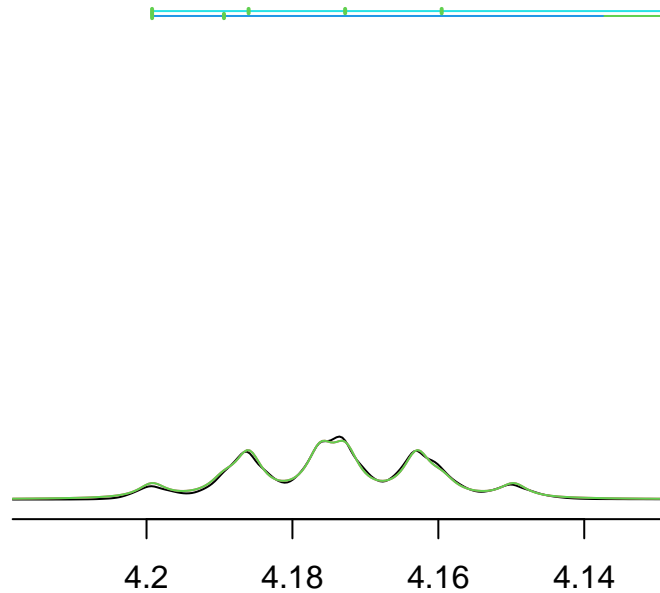

HB

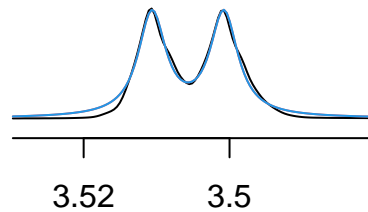

HA

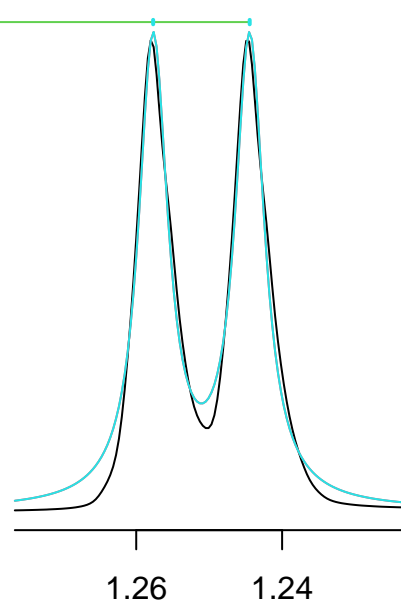

HG2

Supplement: Supplementary file 3 [file mr-2024-7-supplement.zip]

HA

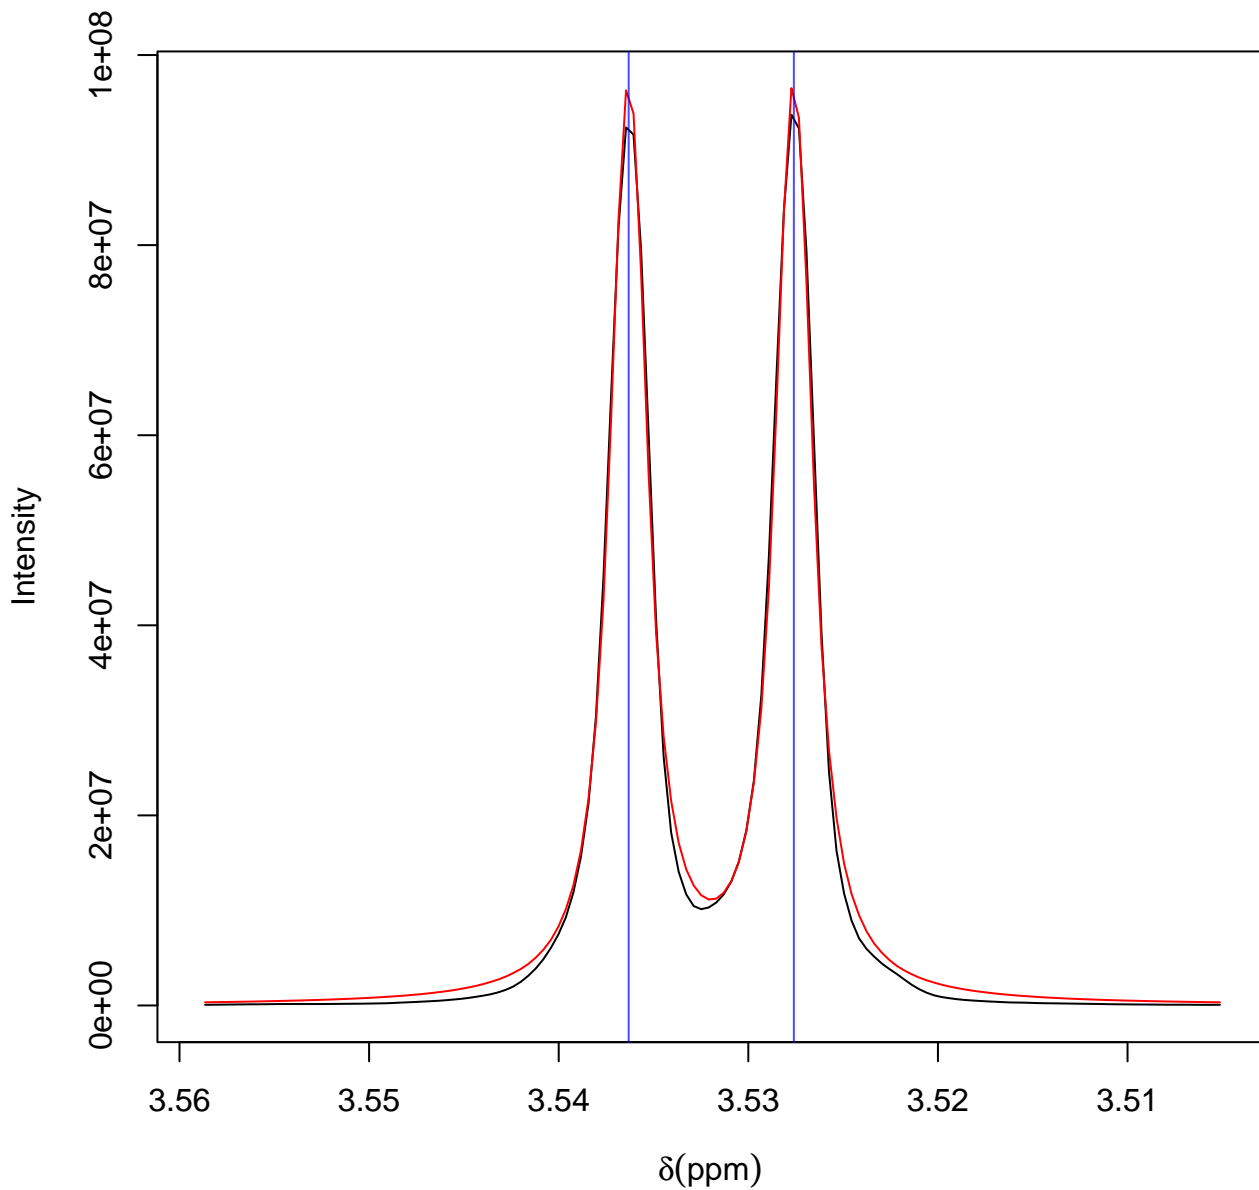

**HB**

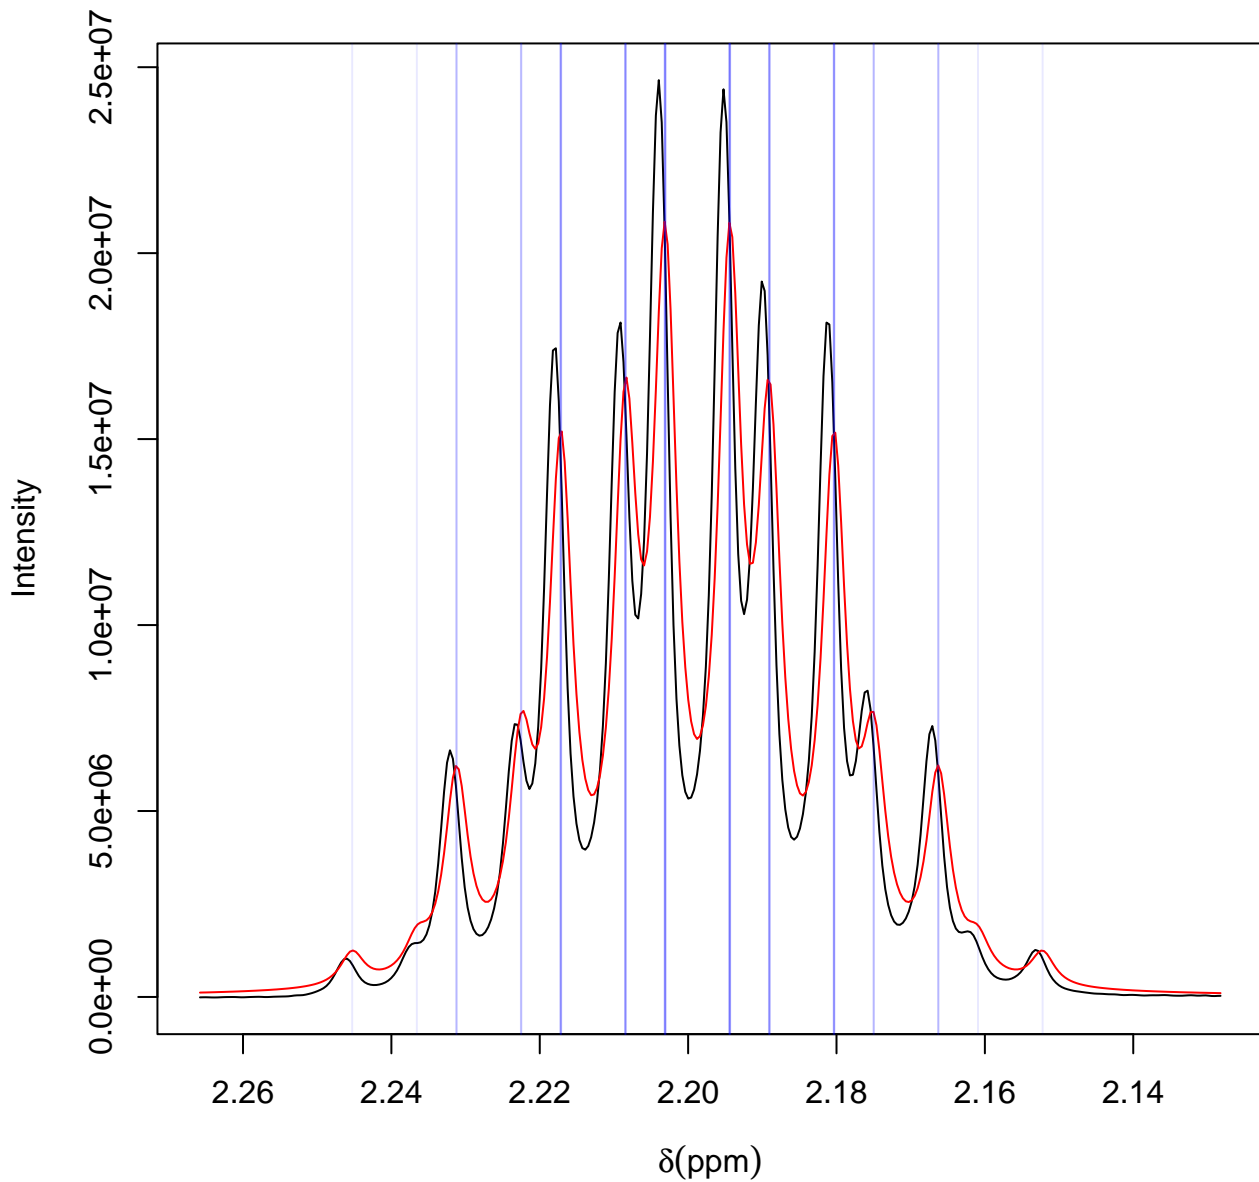

# HG1

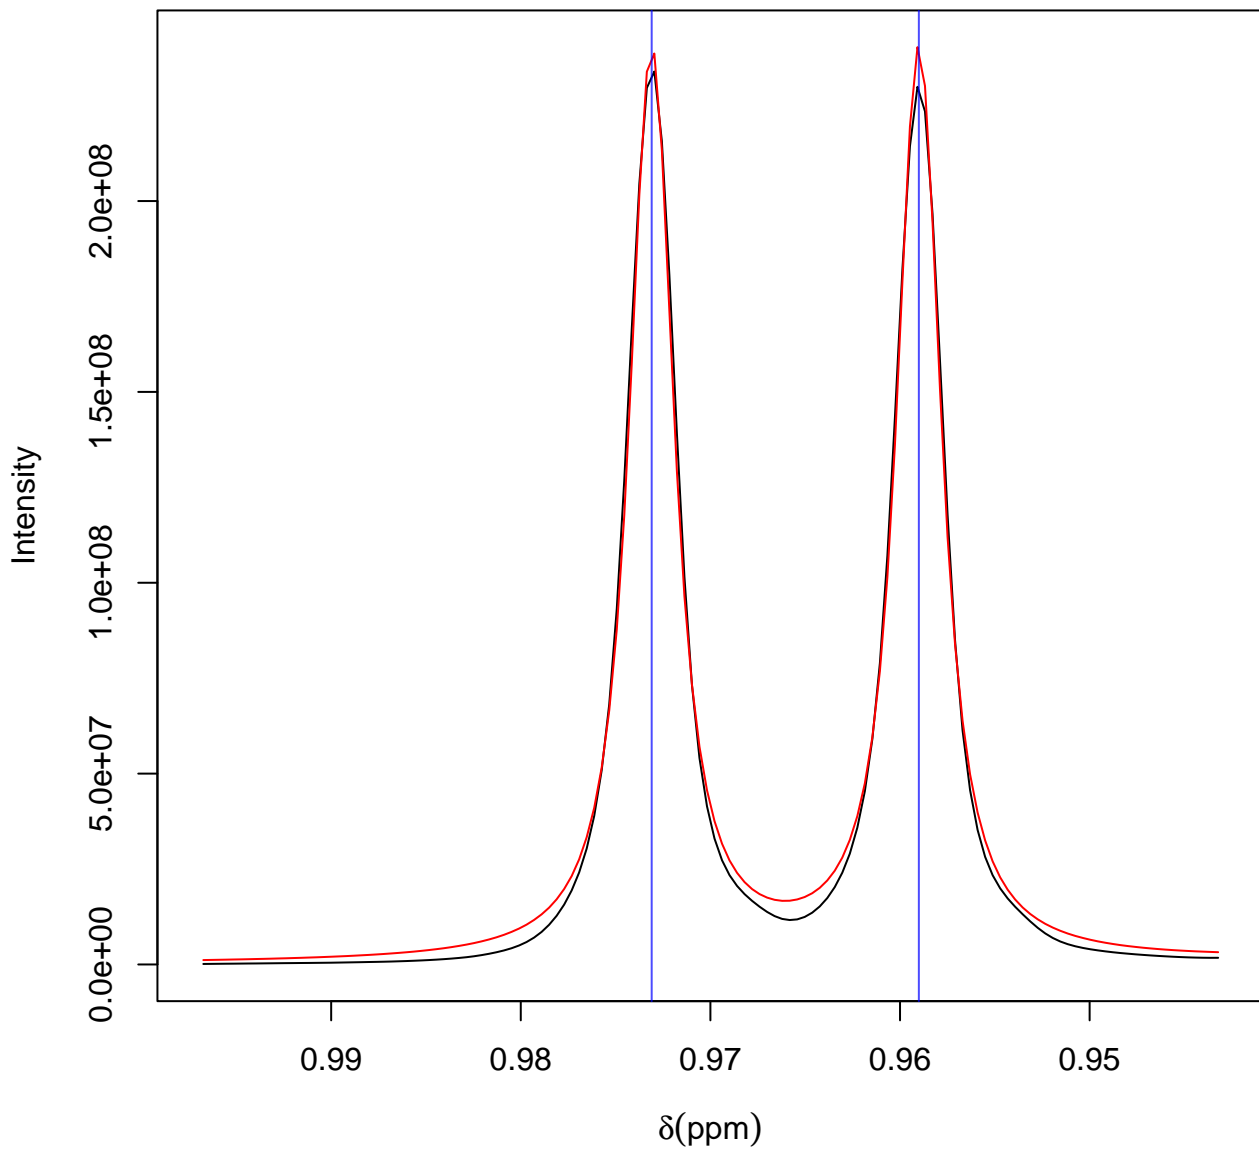

# HG2

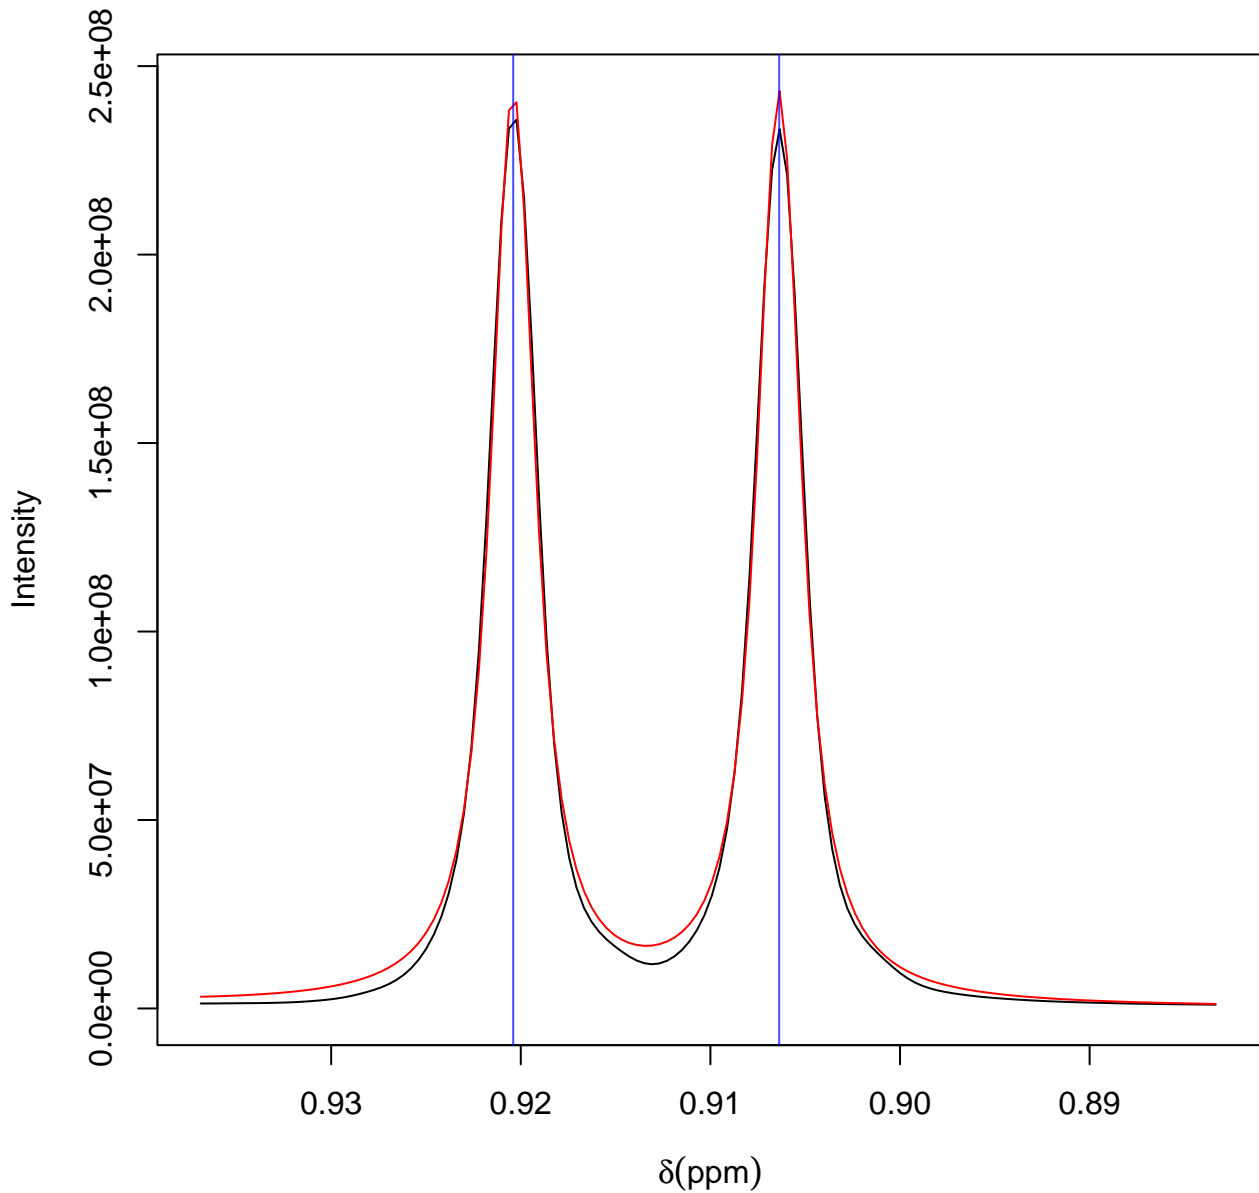

Supplement: Supplementary file 4 [file mr-2024-7-supplement.zip]

HA

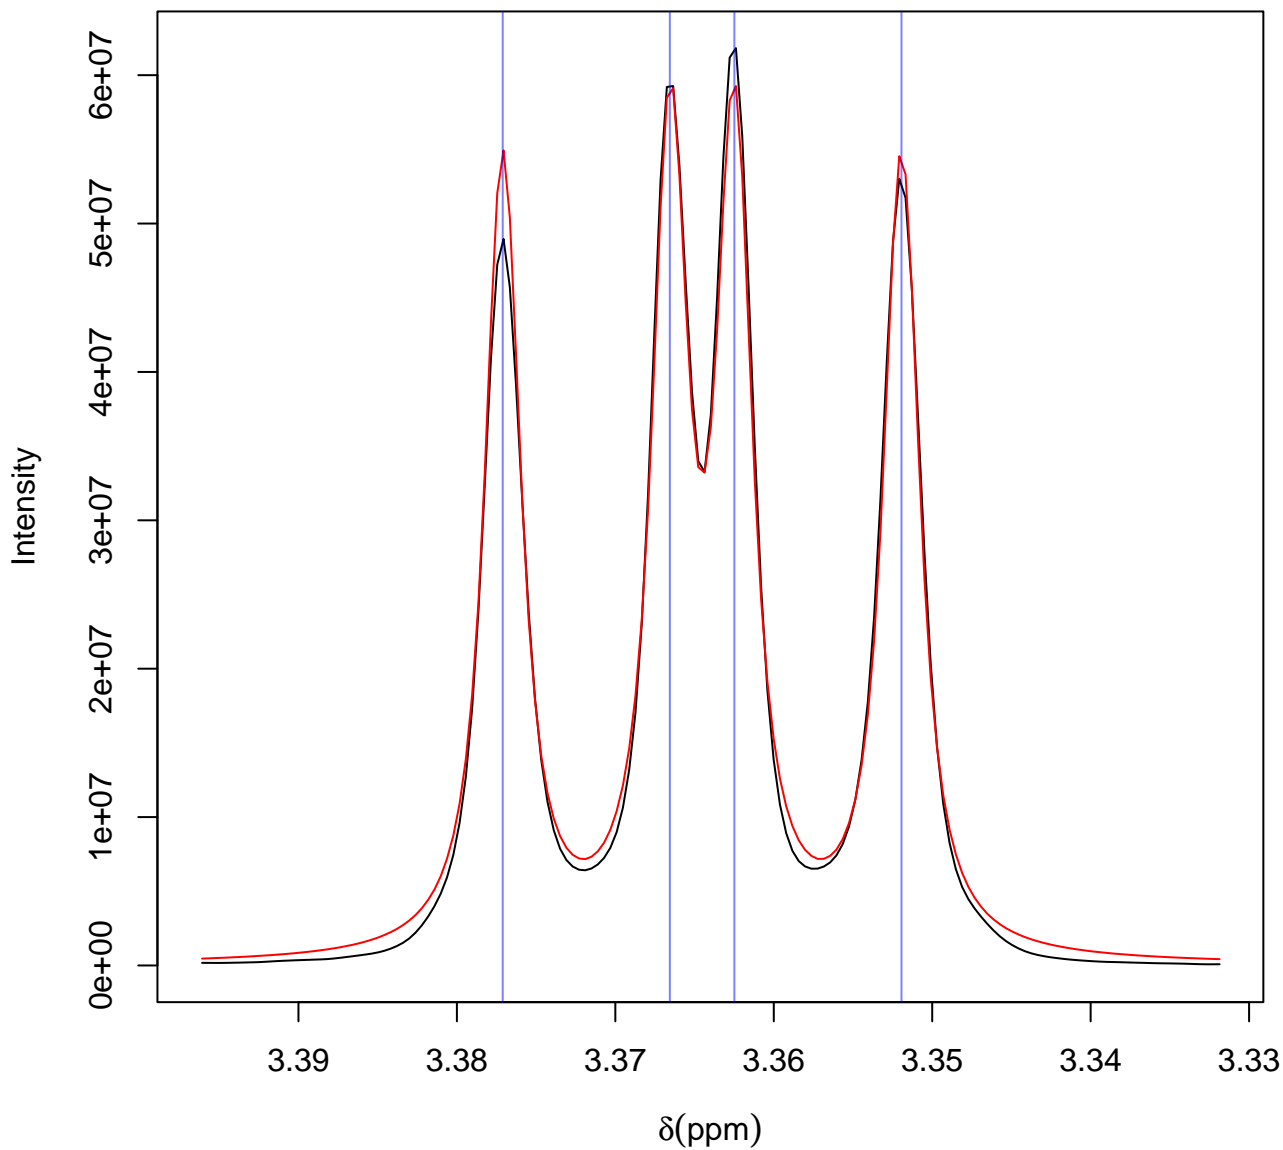

# HB3

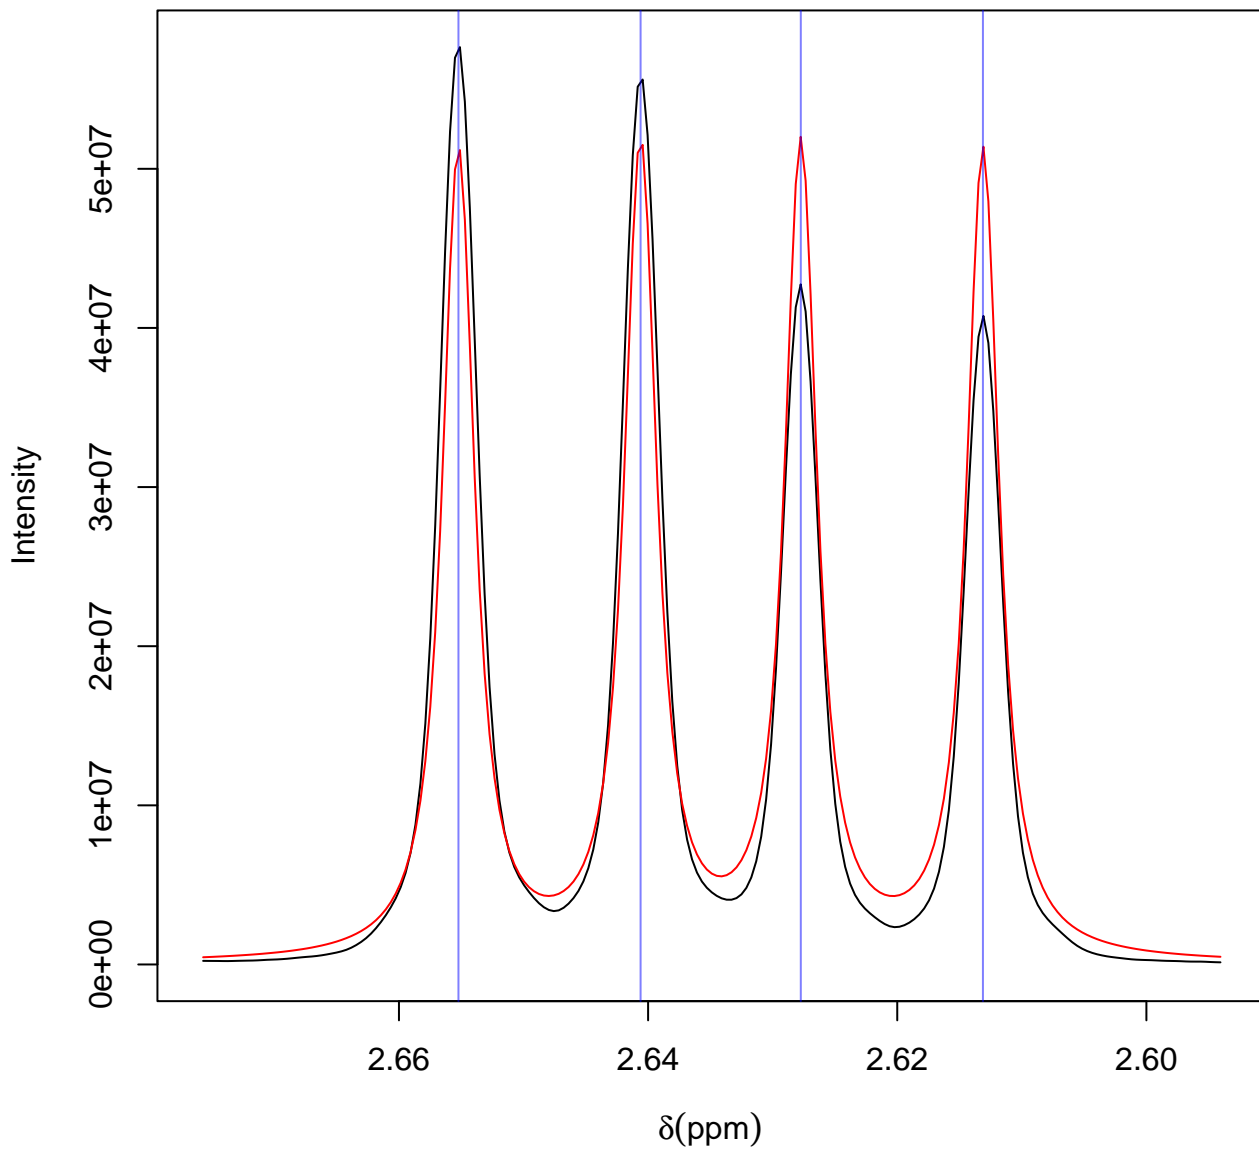

# HB2

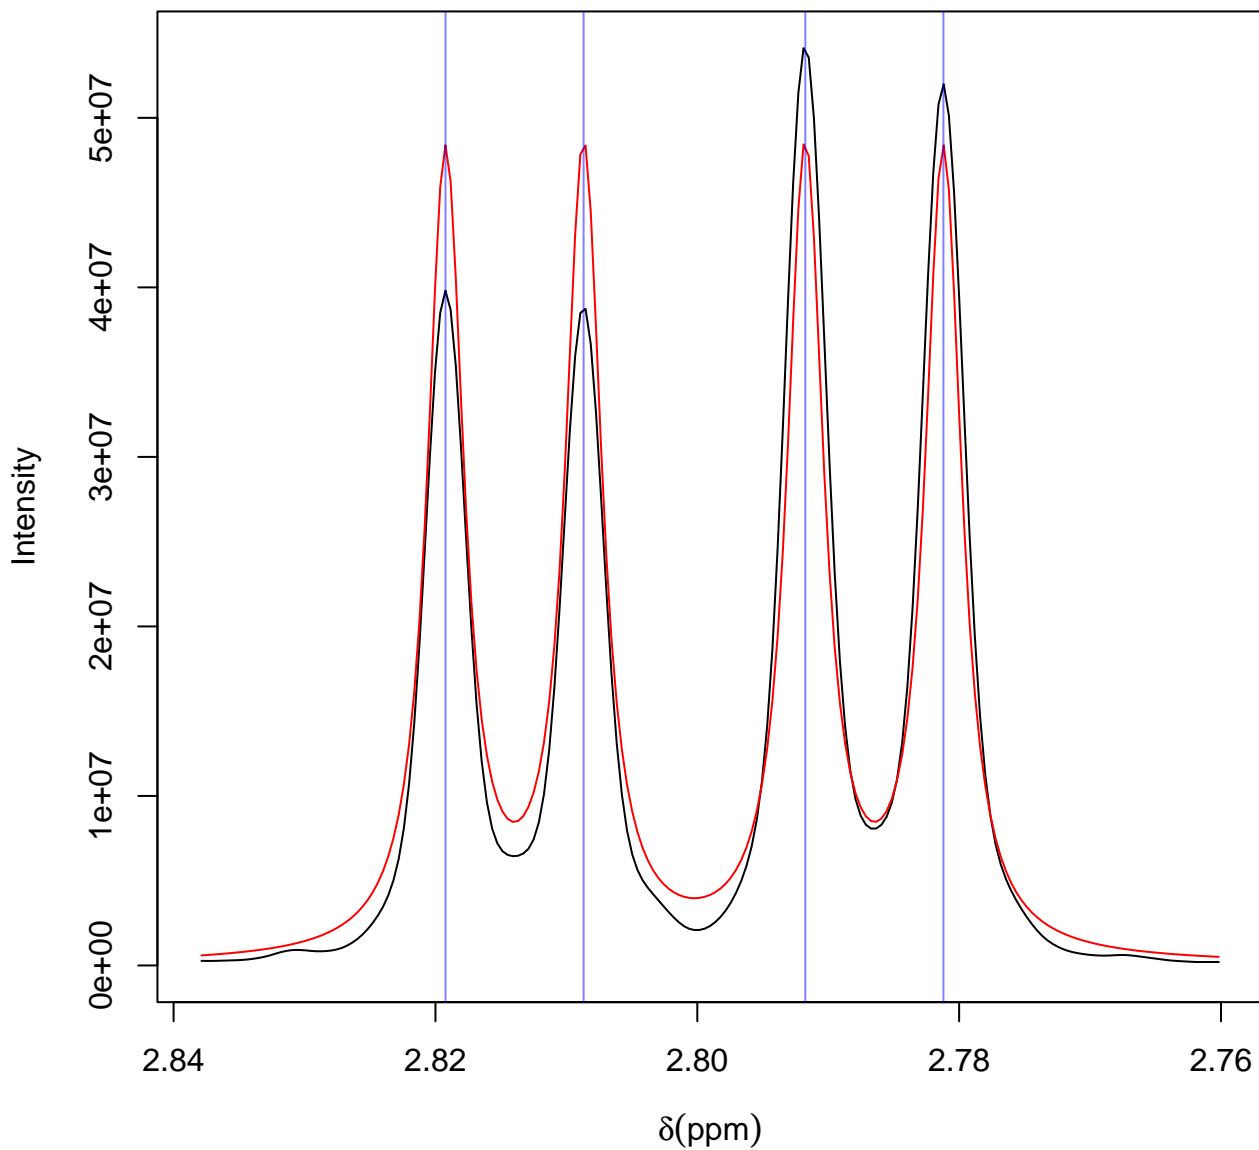

# HD1/2

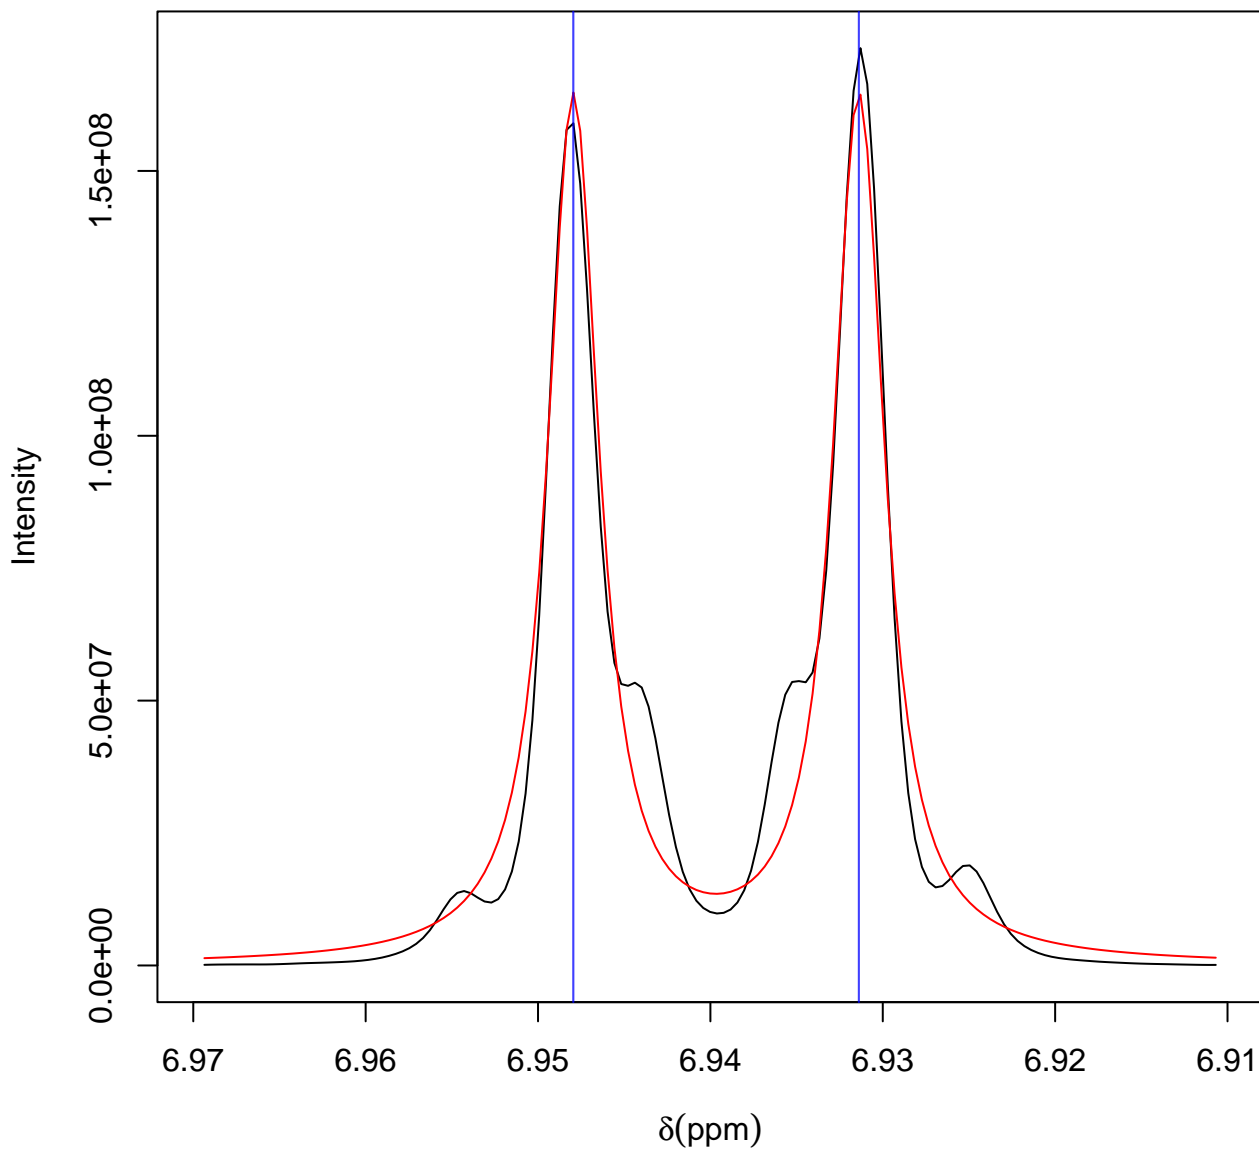

# HE1/2

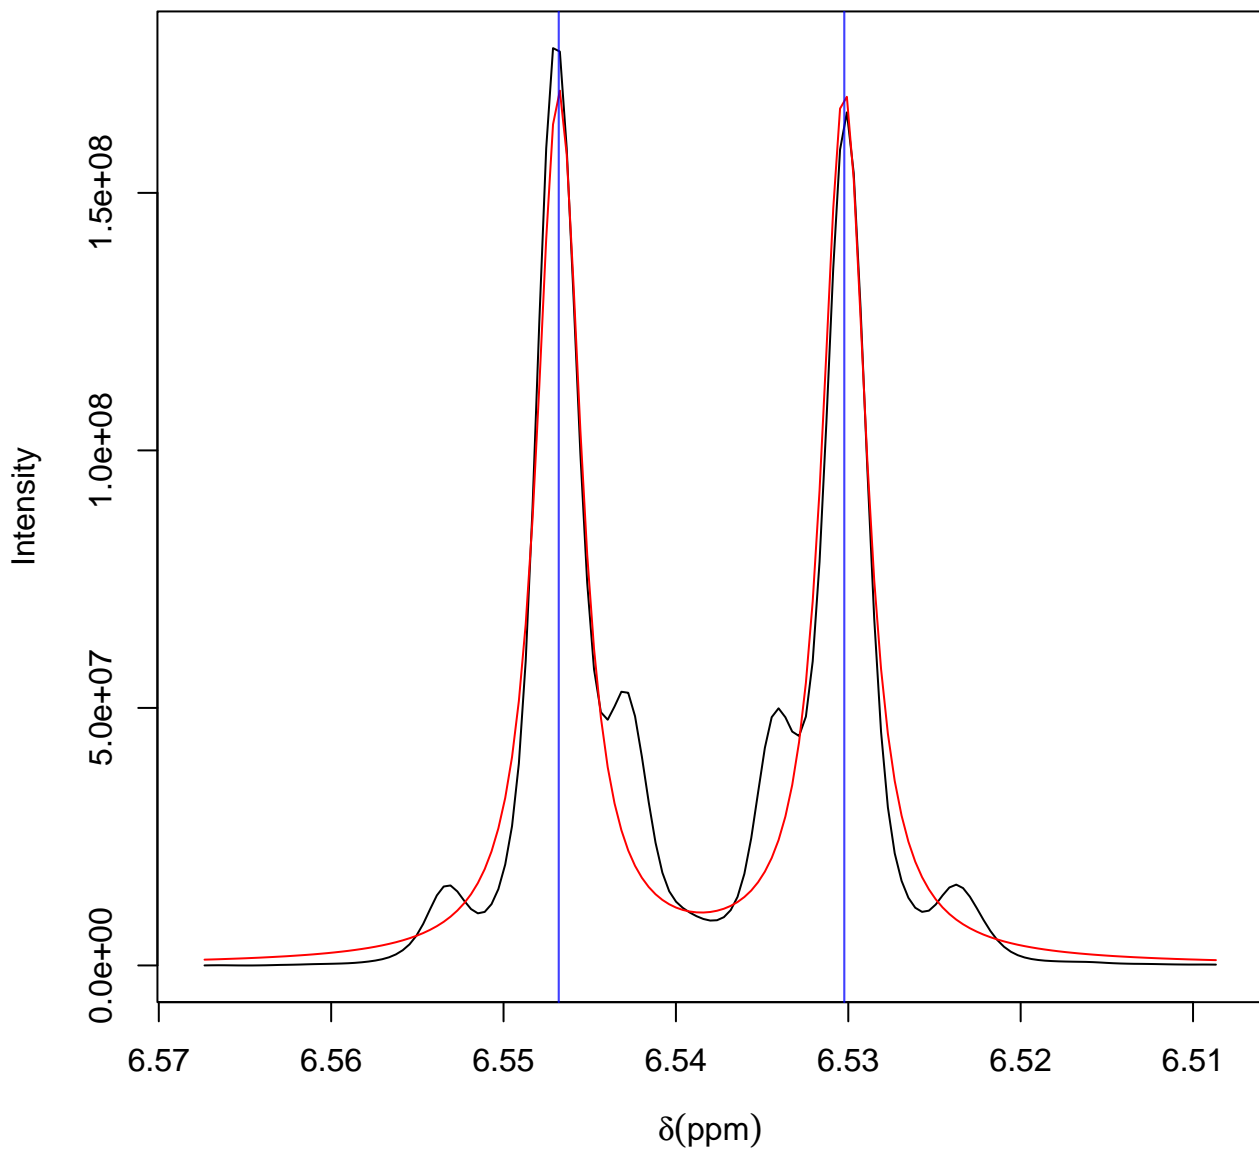

Supplement: Supplementary file 5 [file mr-2024-7-supplement.zip]

HA

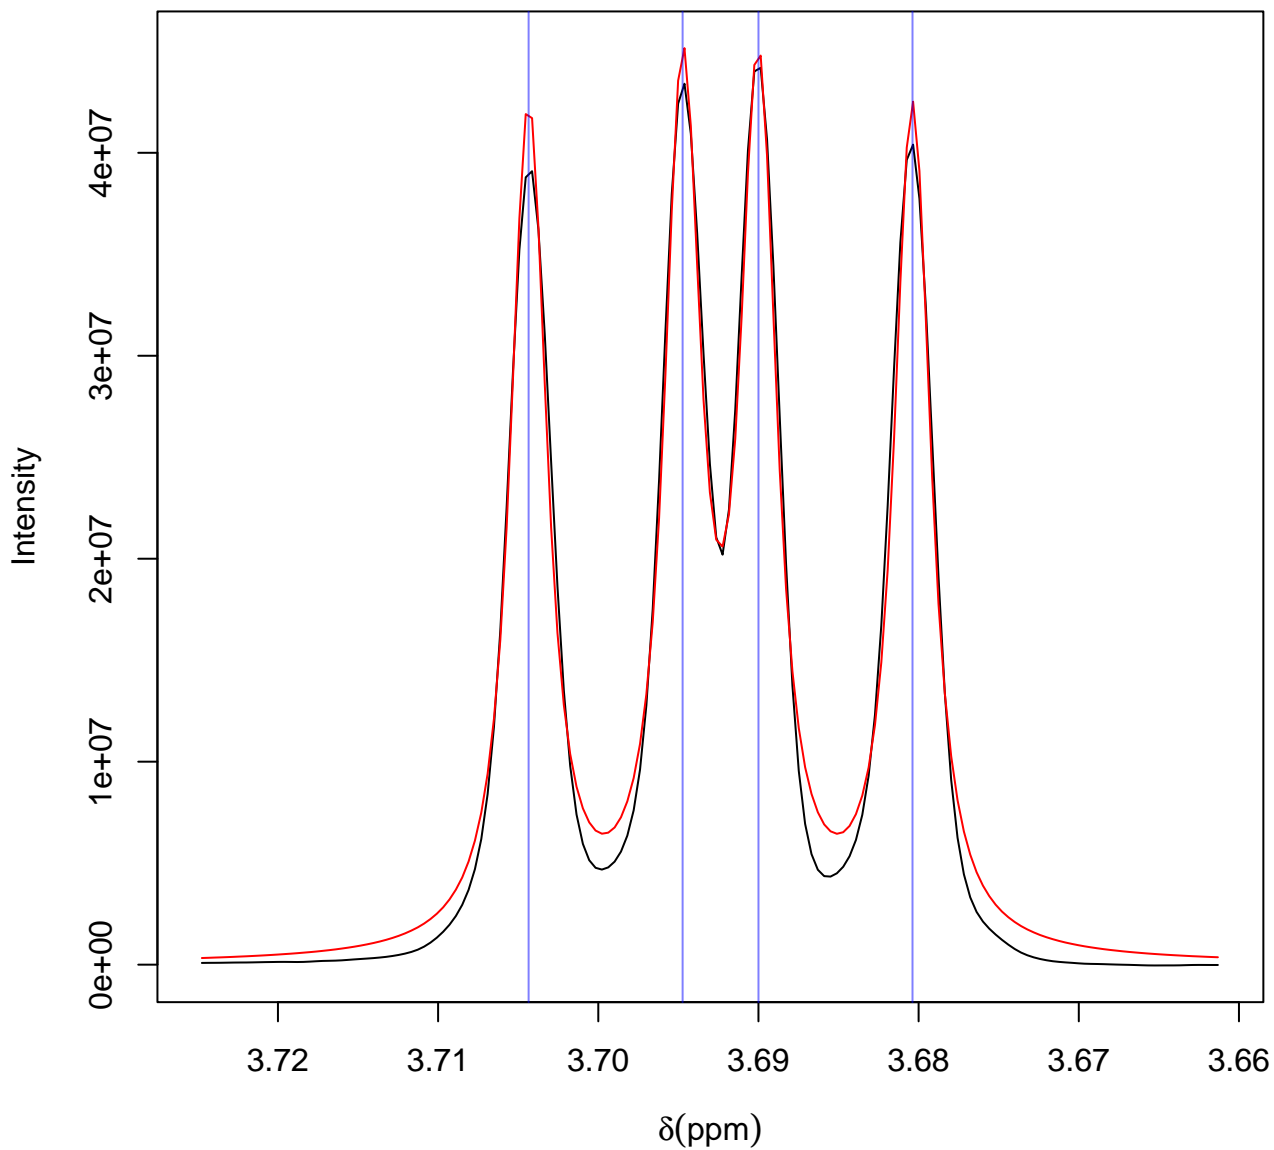

# HB2

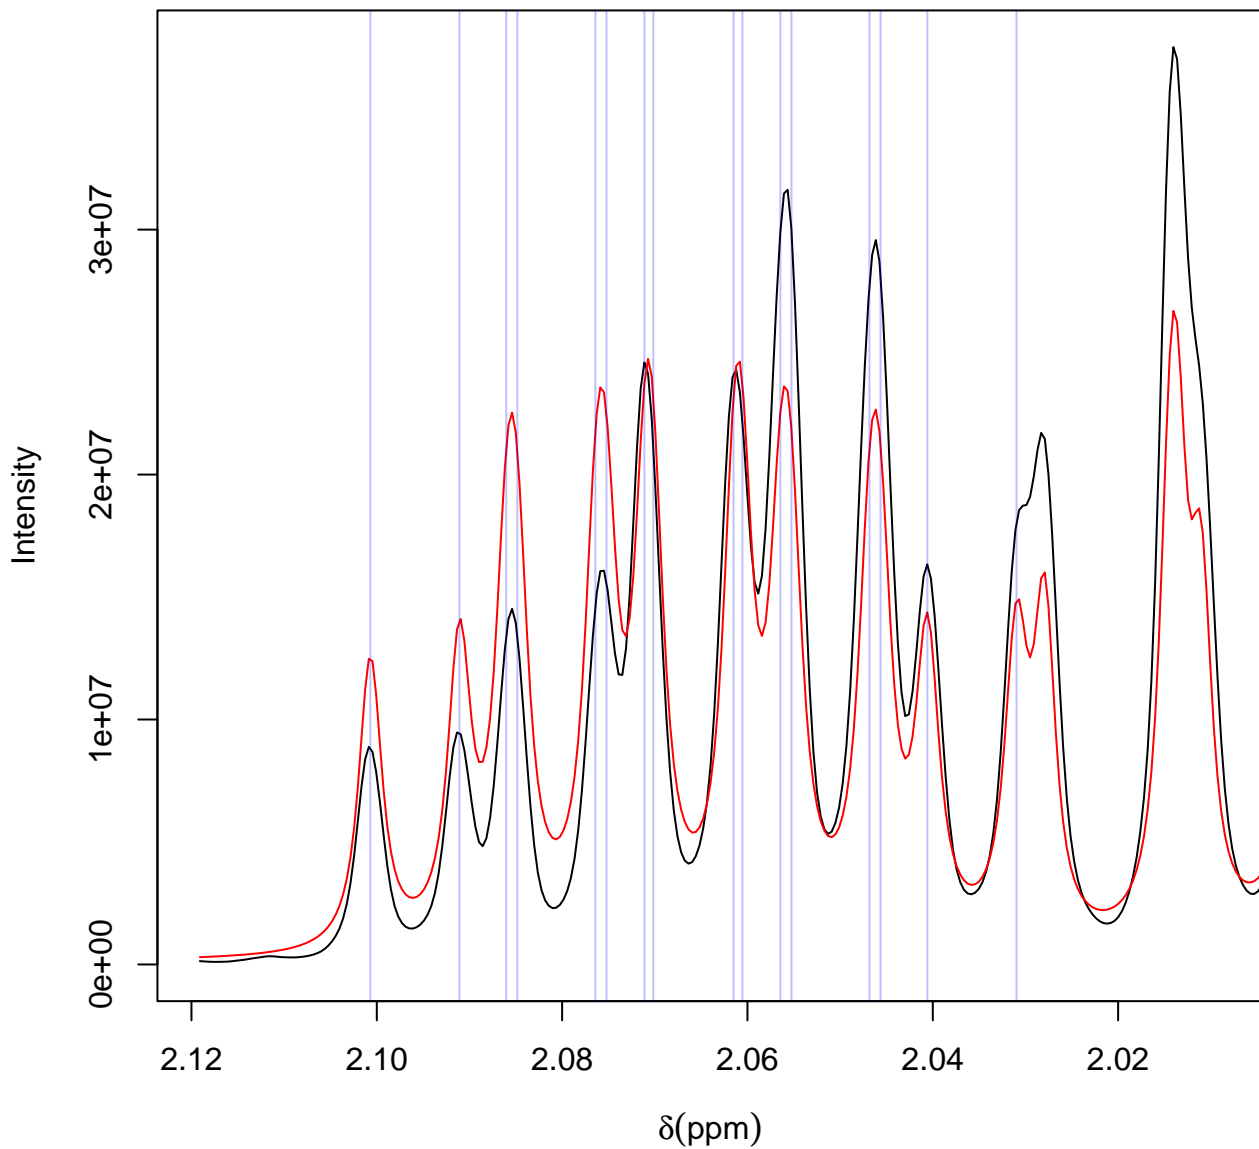

# HB3

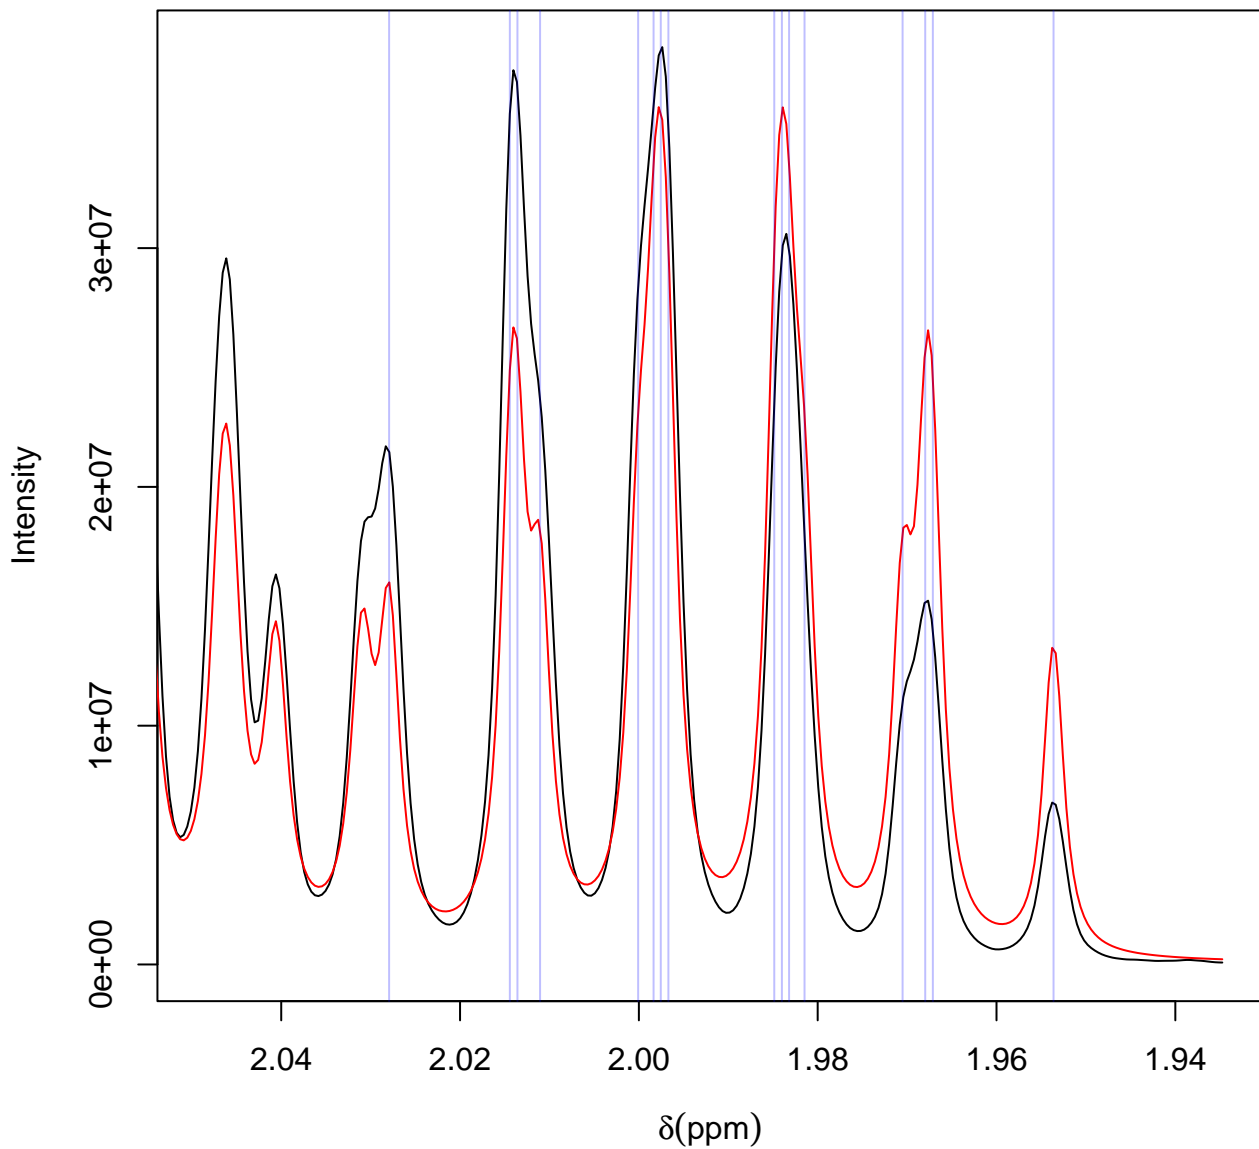

# HG3

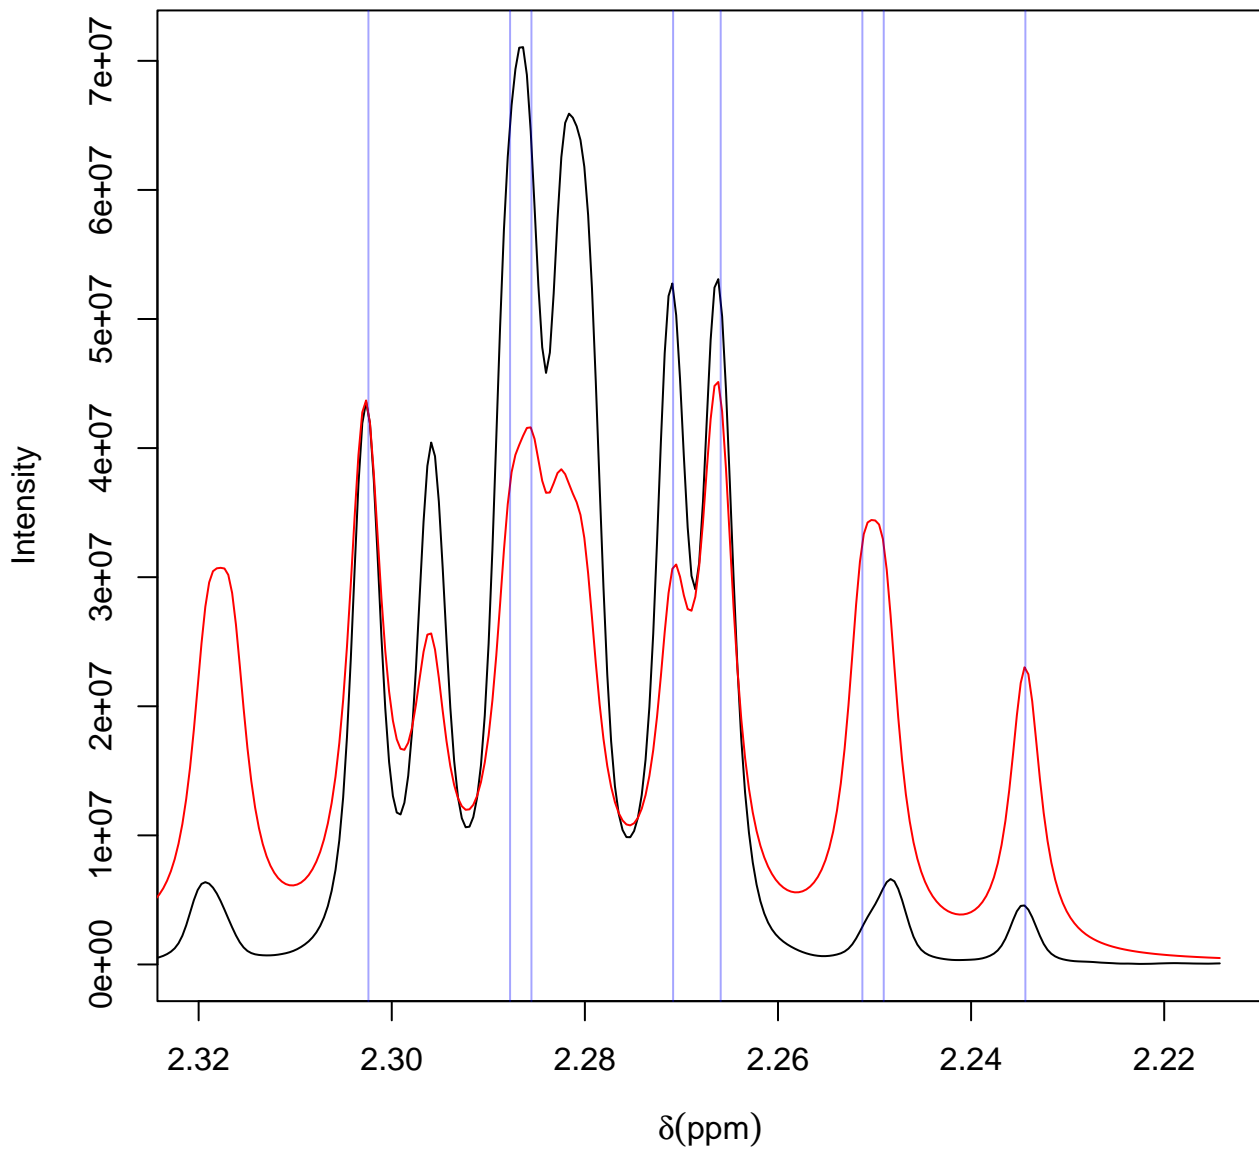

# HG2

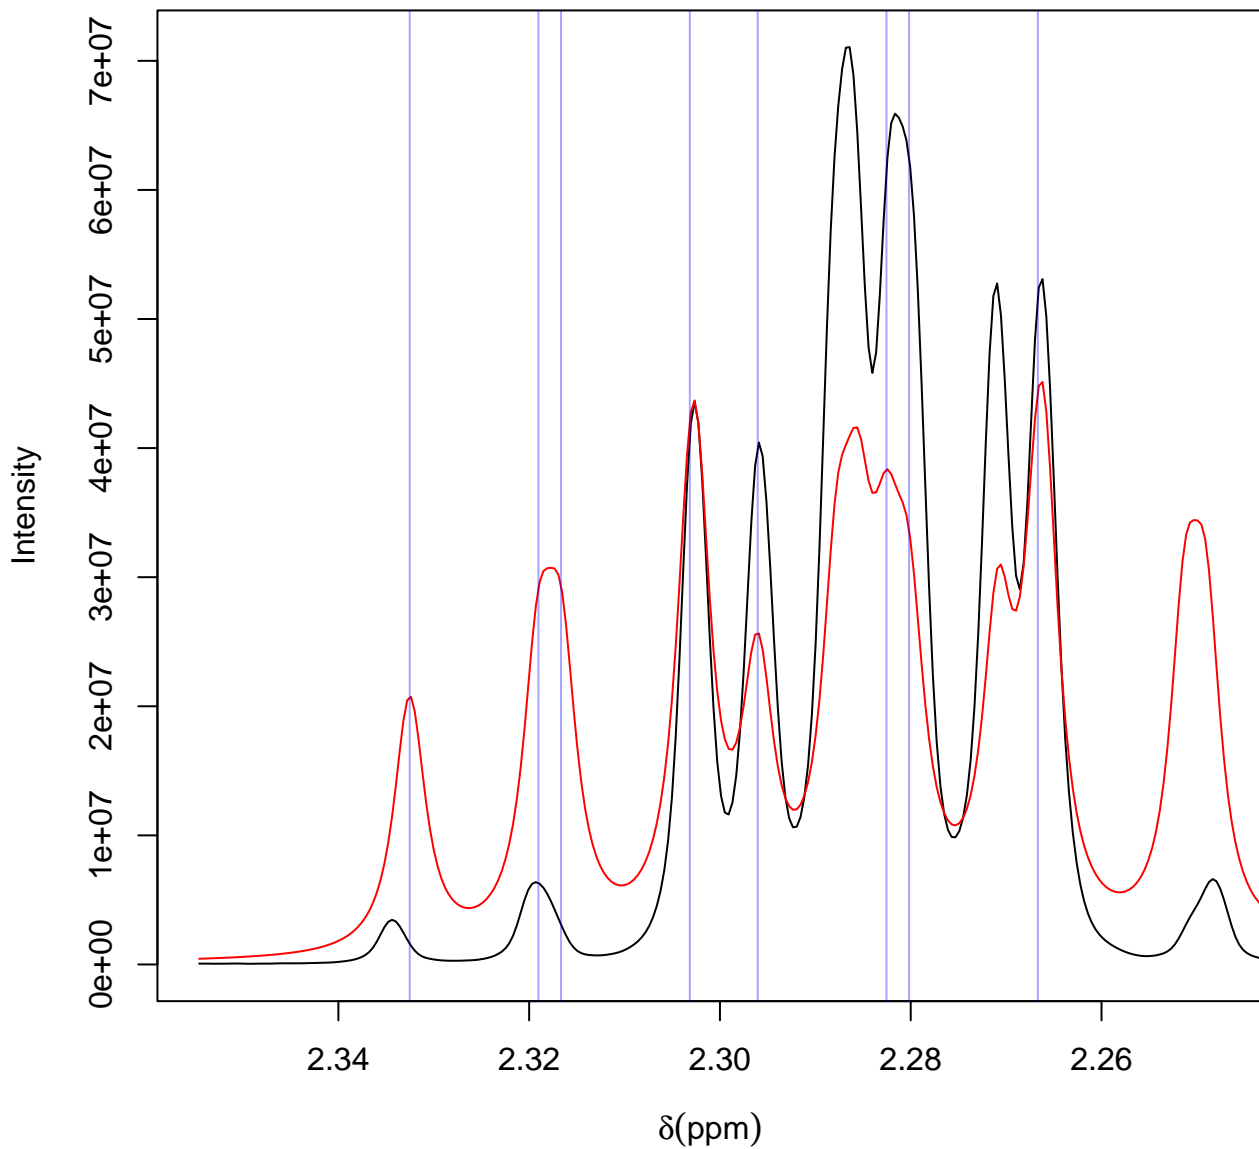

Supplement: Supplementary file 6 [file mr-2024-7-supplement.zip]

HA

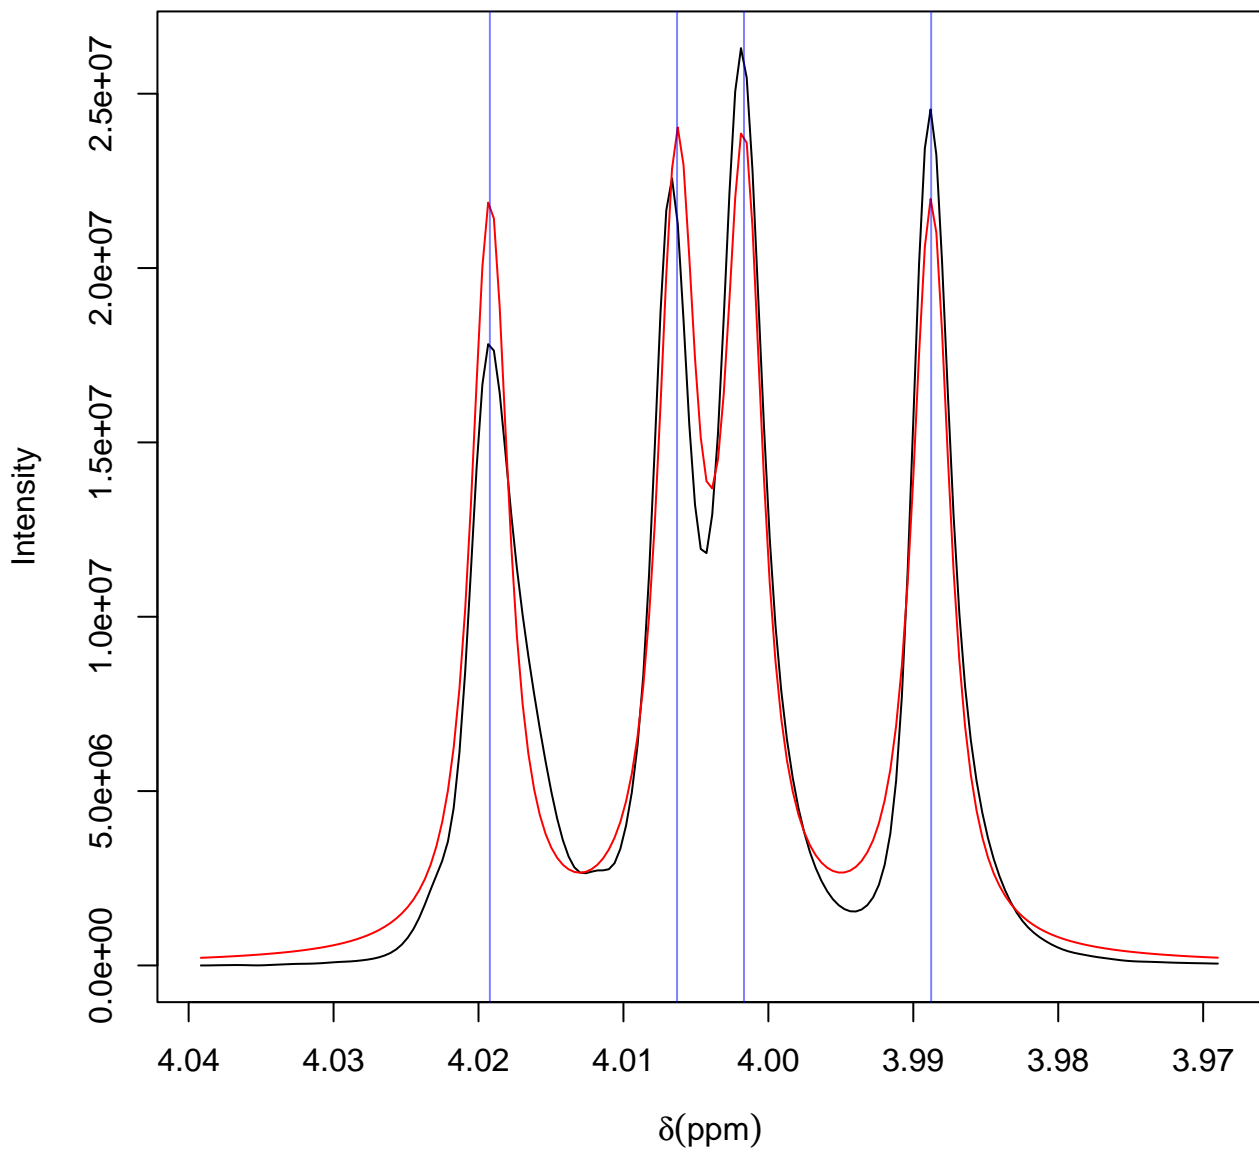

# HB3

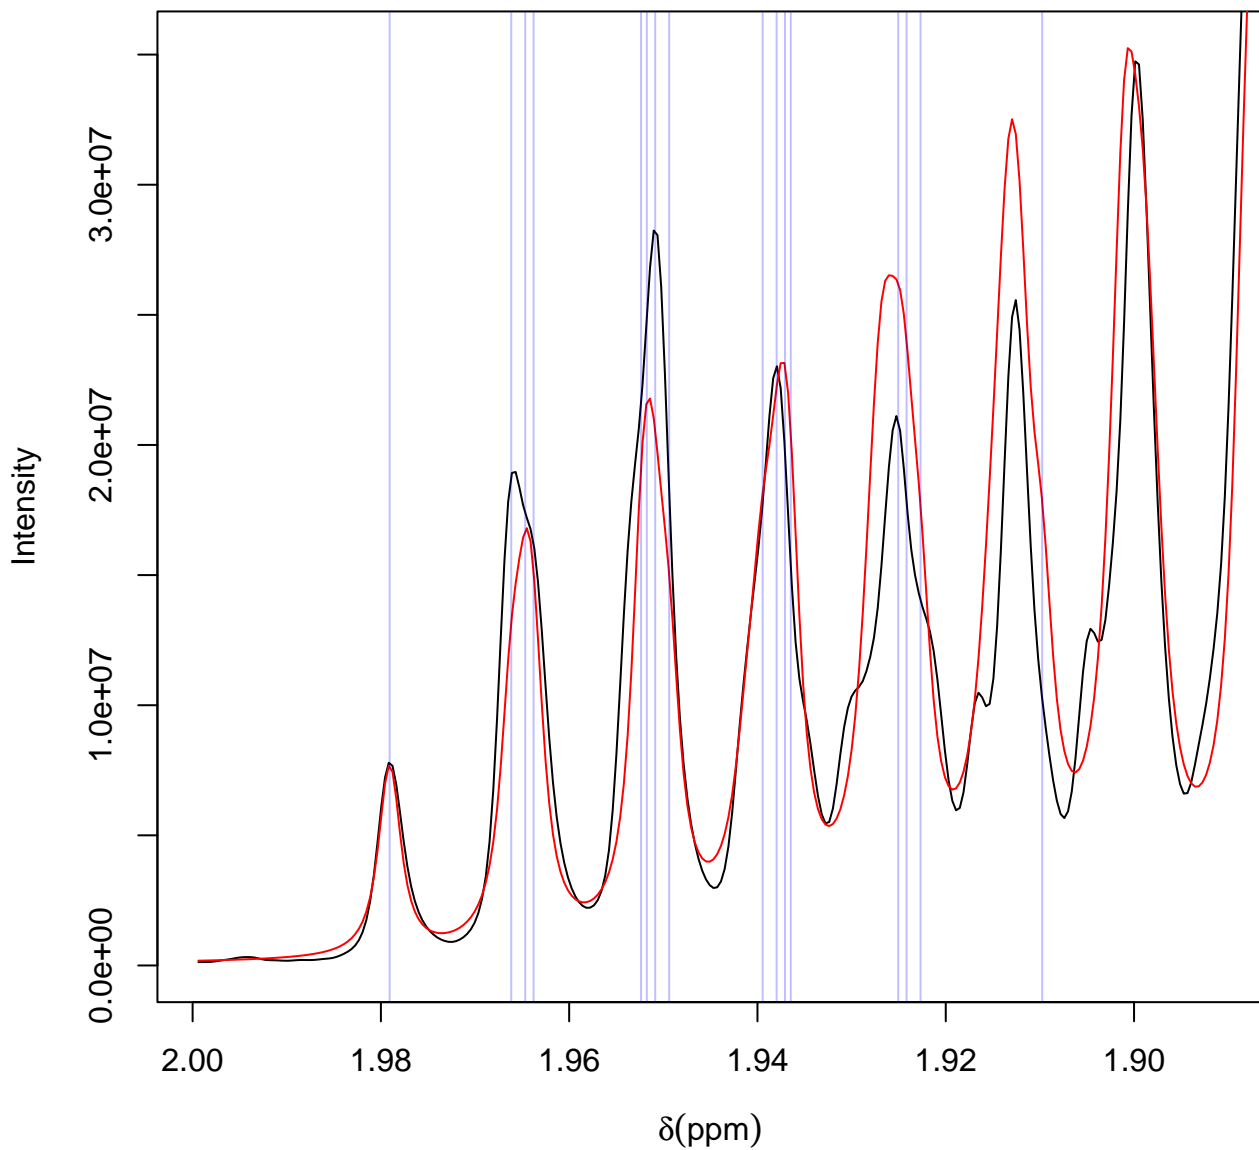

# HB2

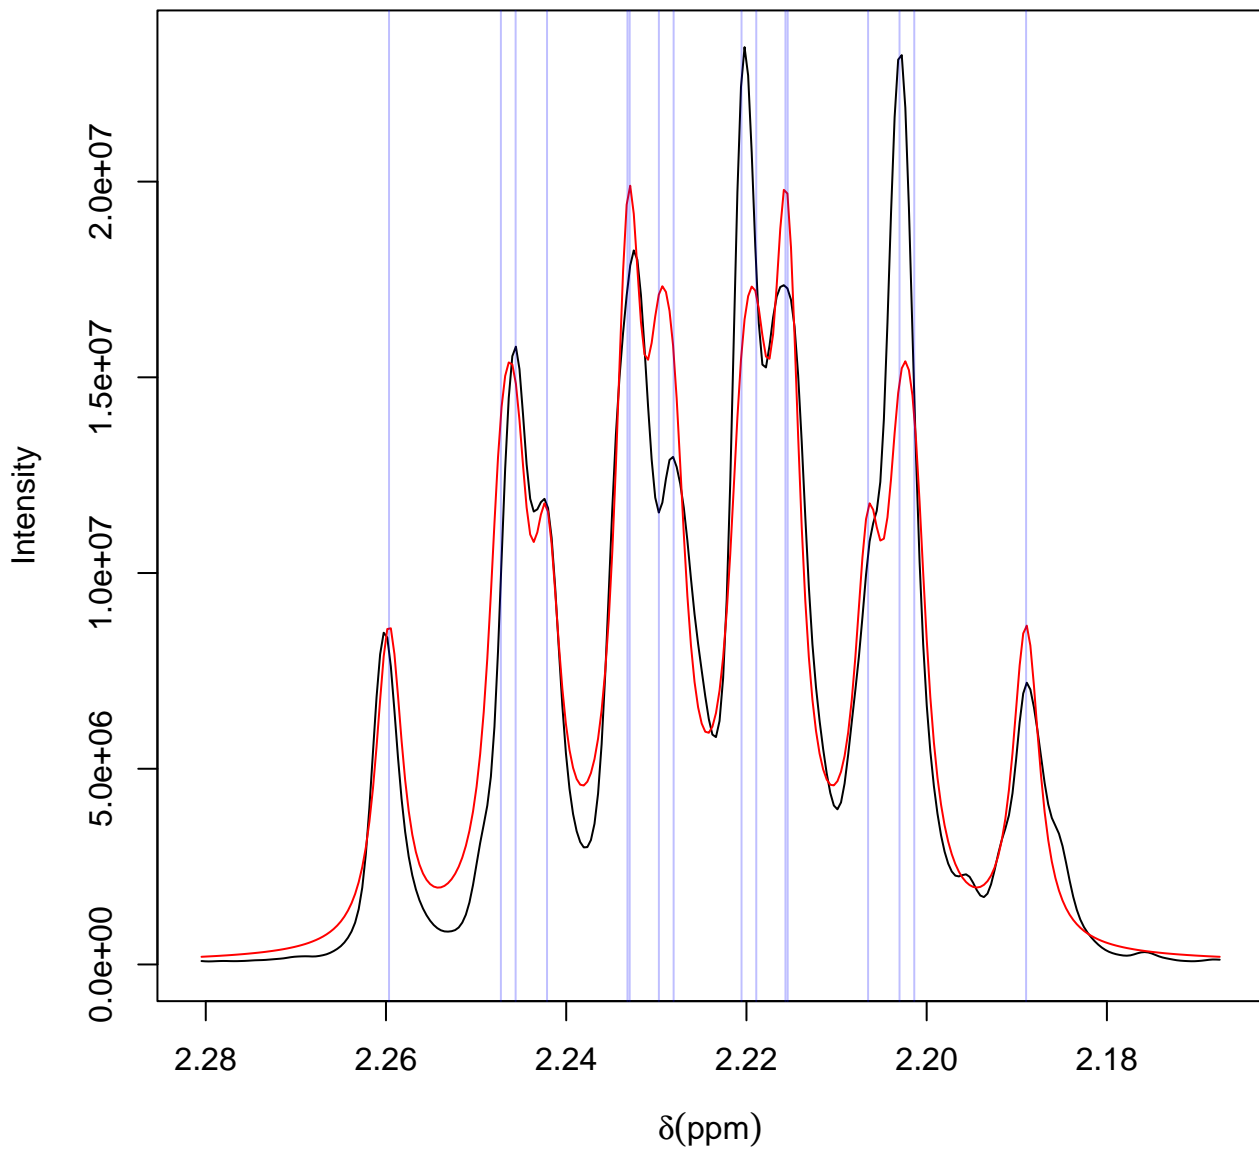

# HG2

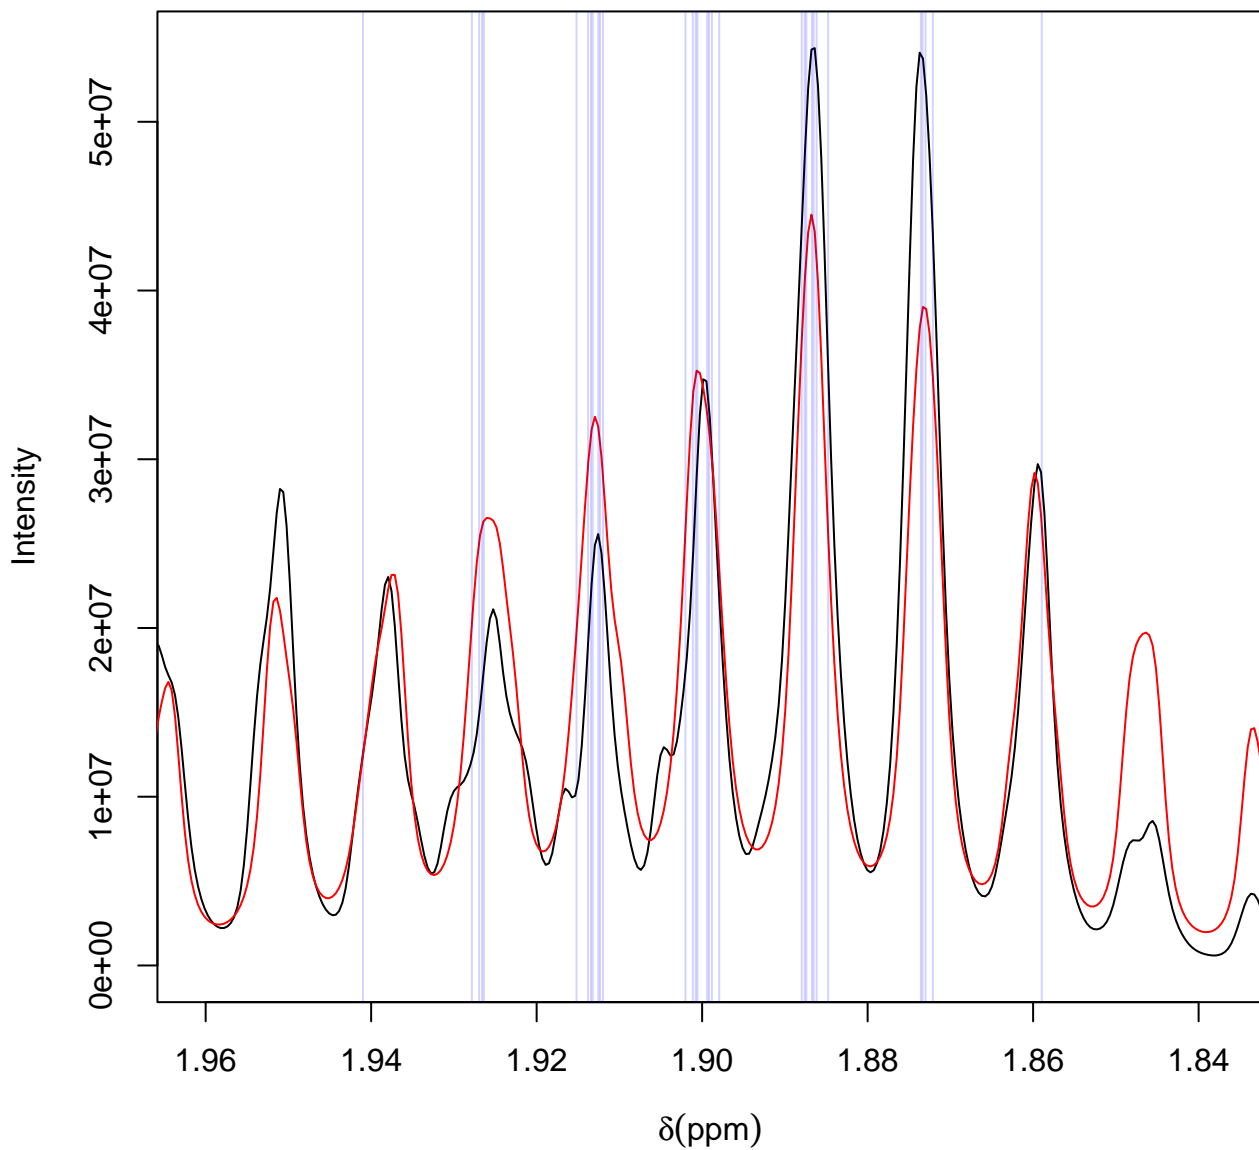

# HG3

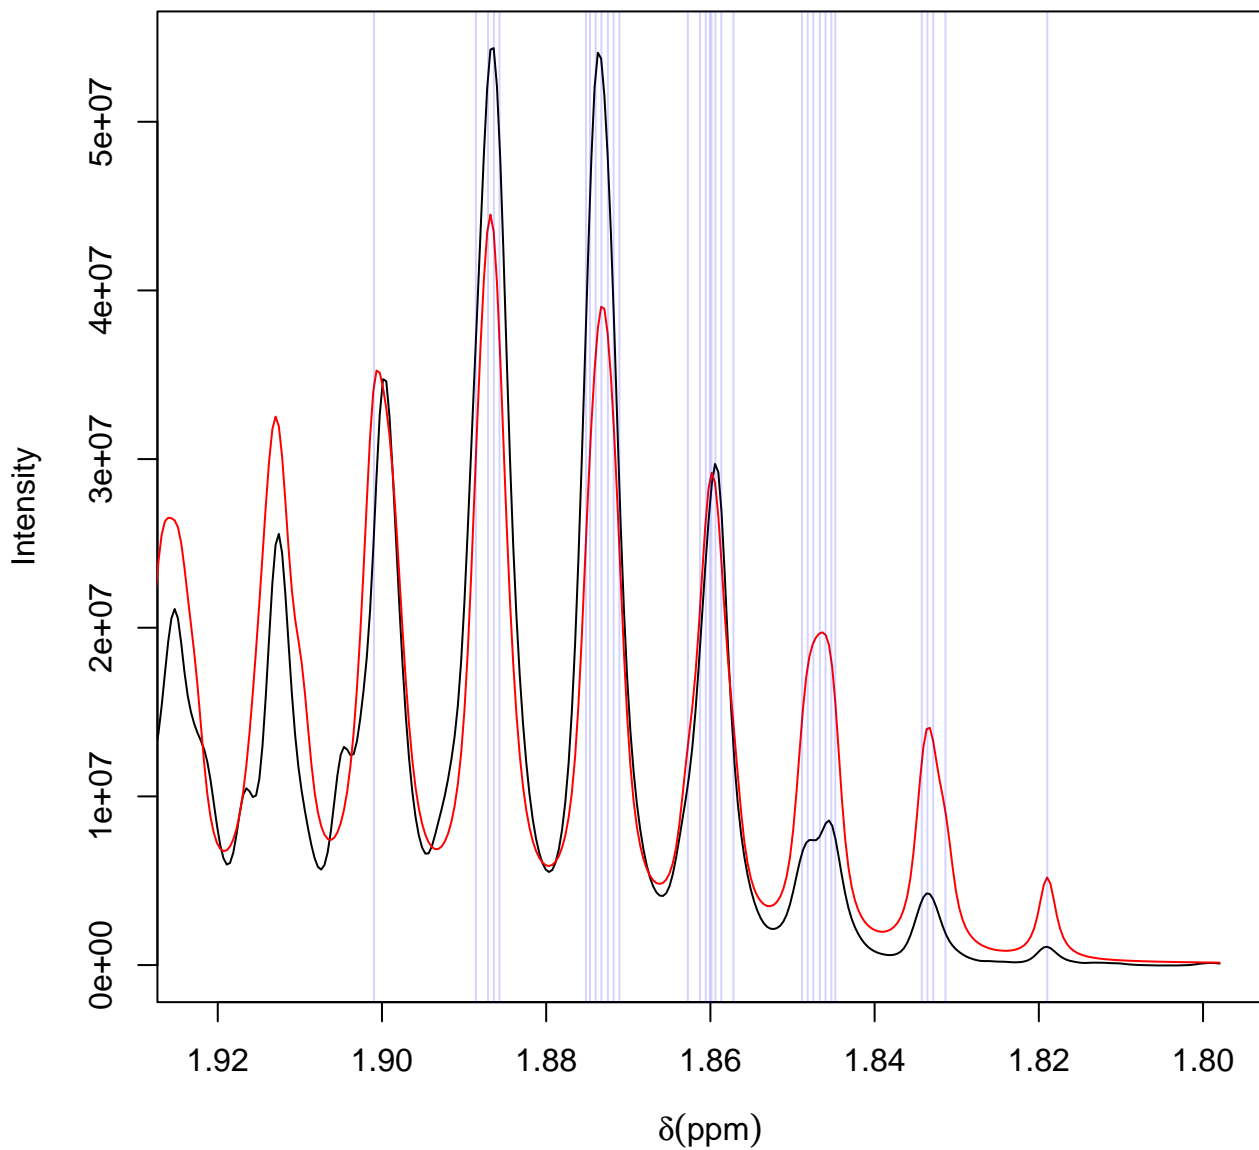

# HD3

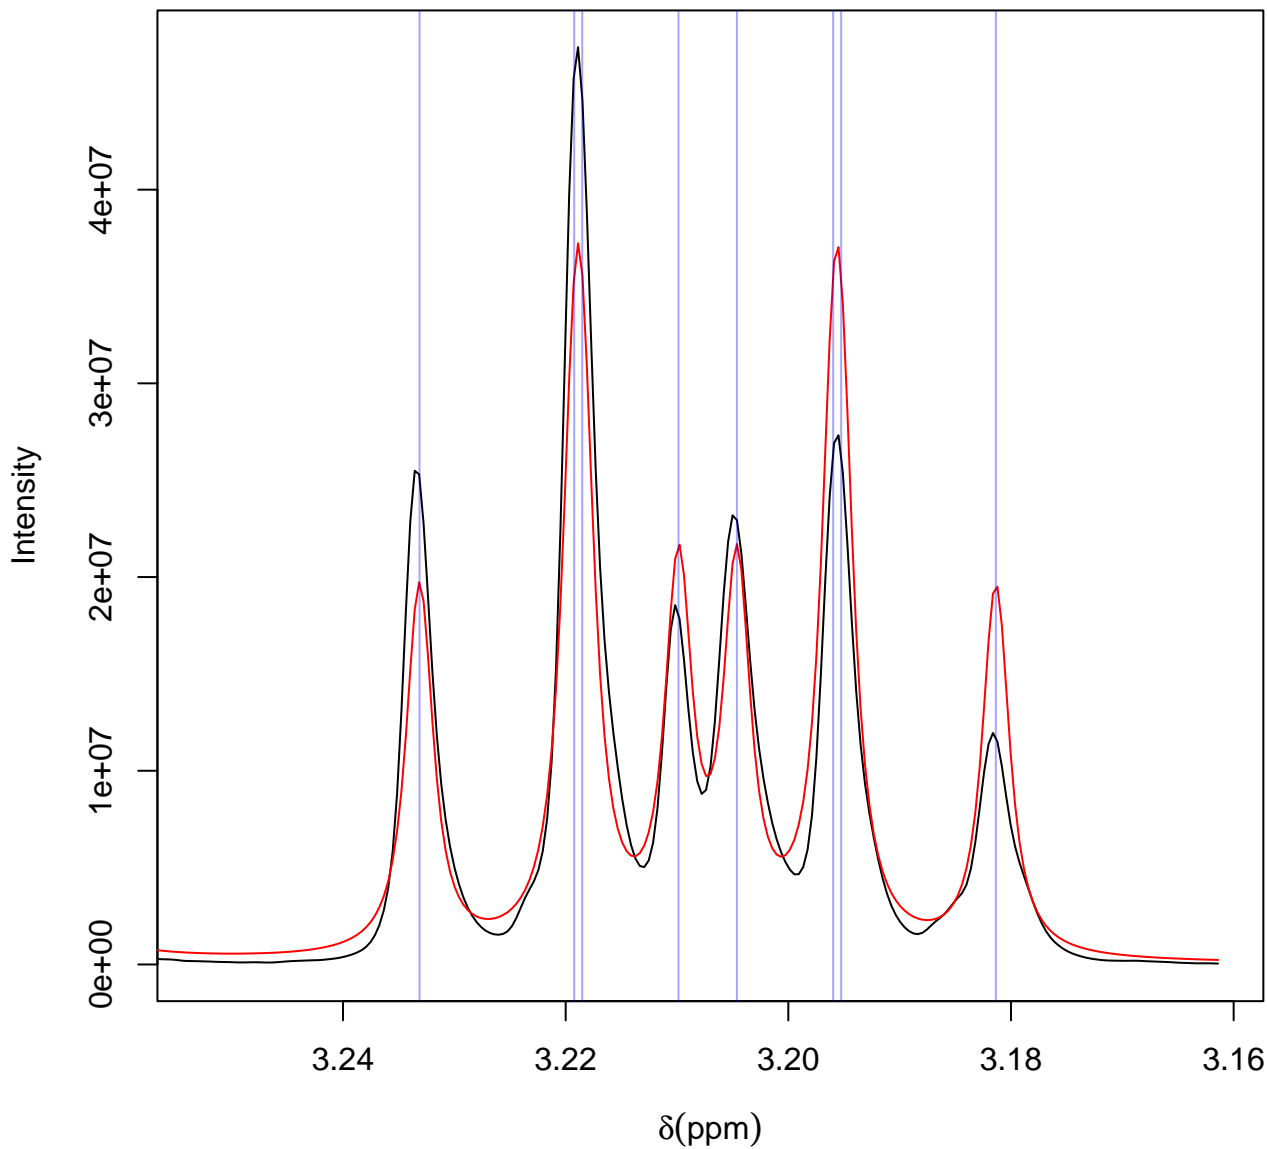

# HD2

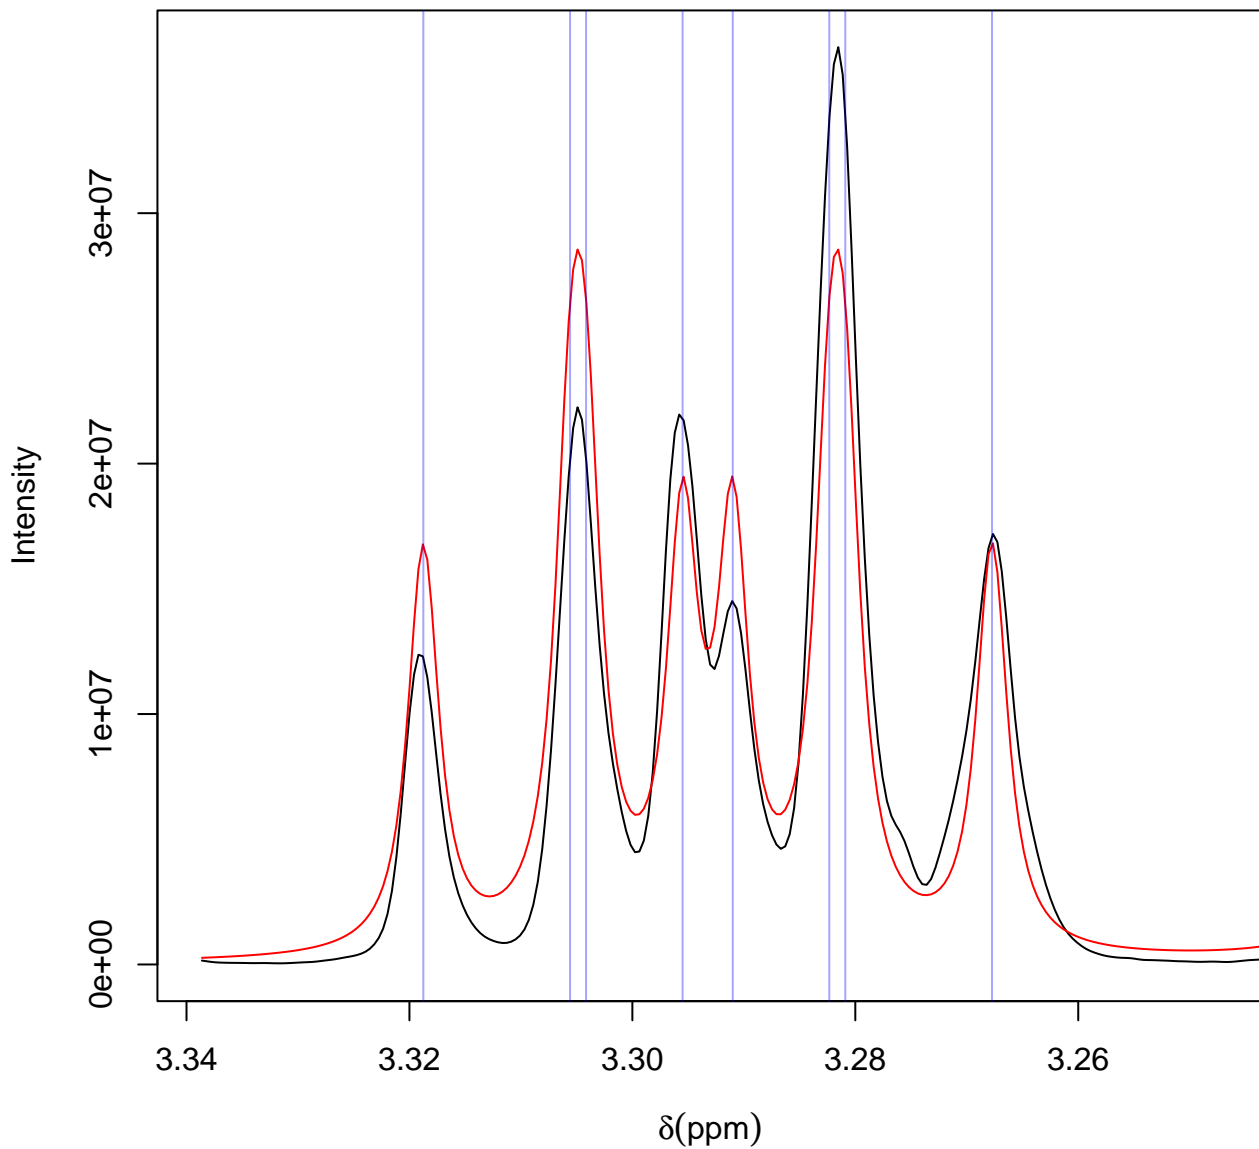

Supplement: Supplementary file 7 [file mr-2024-7-supplement.zip]

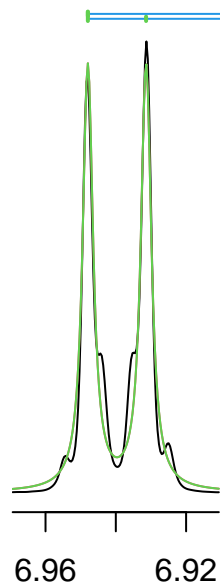

HD1/2

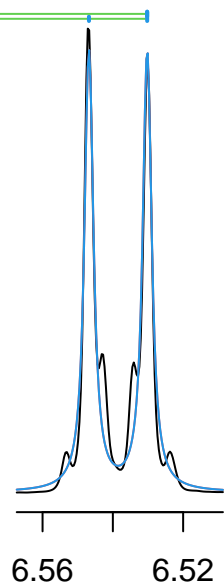

HE1/2

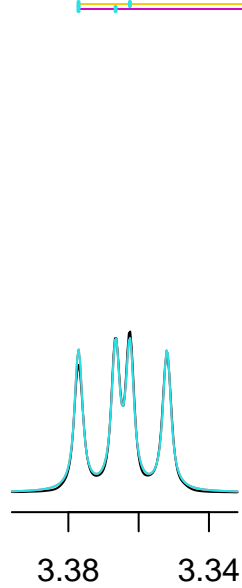

HA

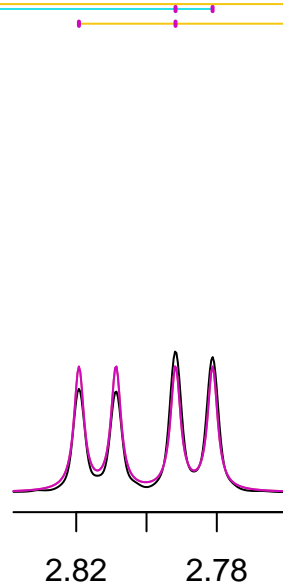

HB2

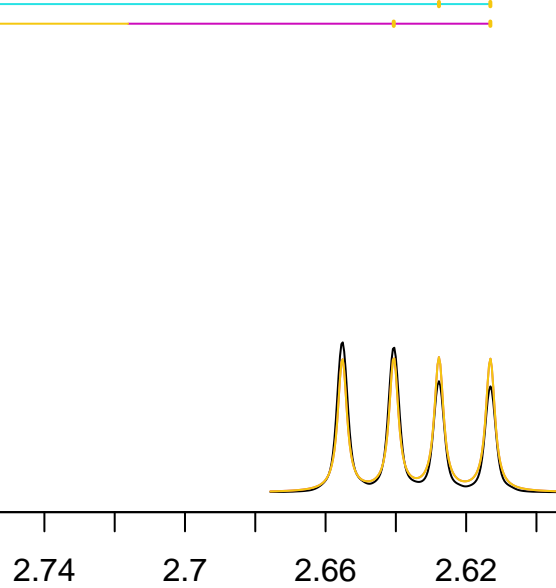

HB3

Supplement: Supplementary file 8 [file mr-2024-7-supplement.zip]

HA

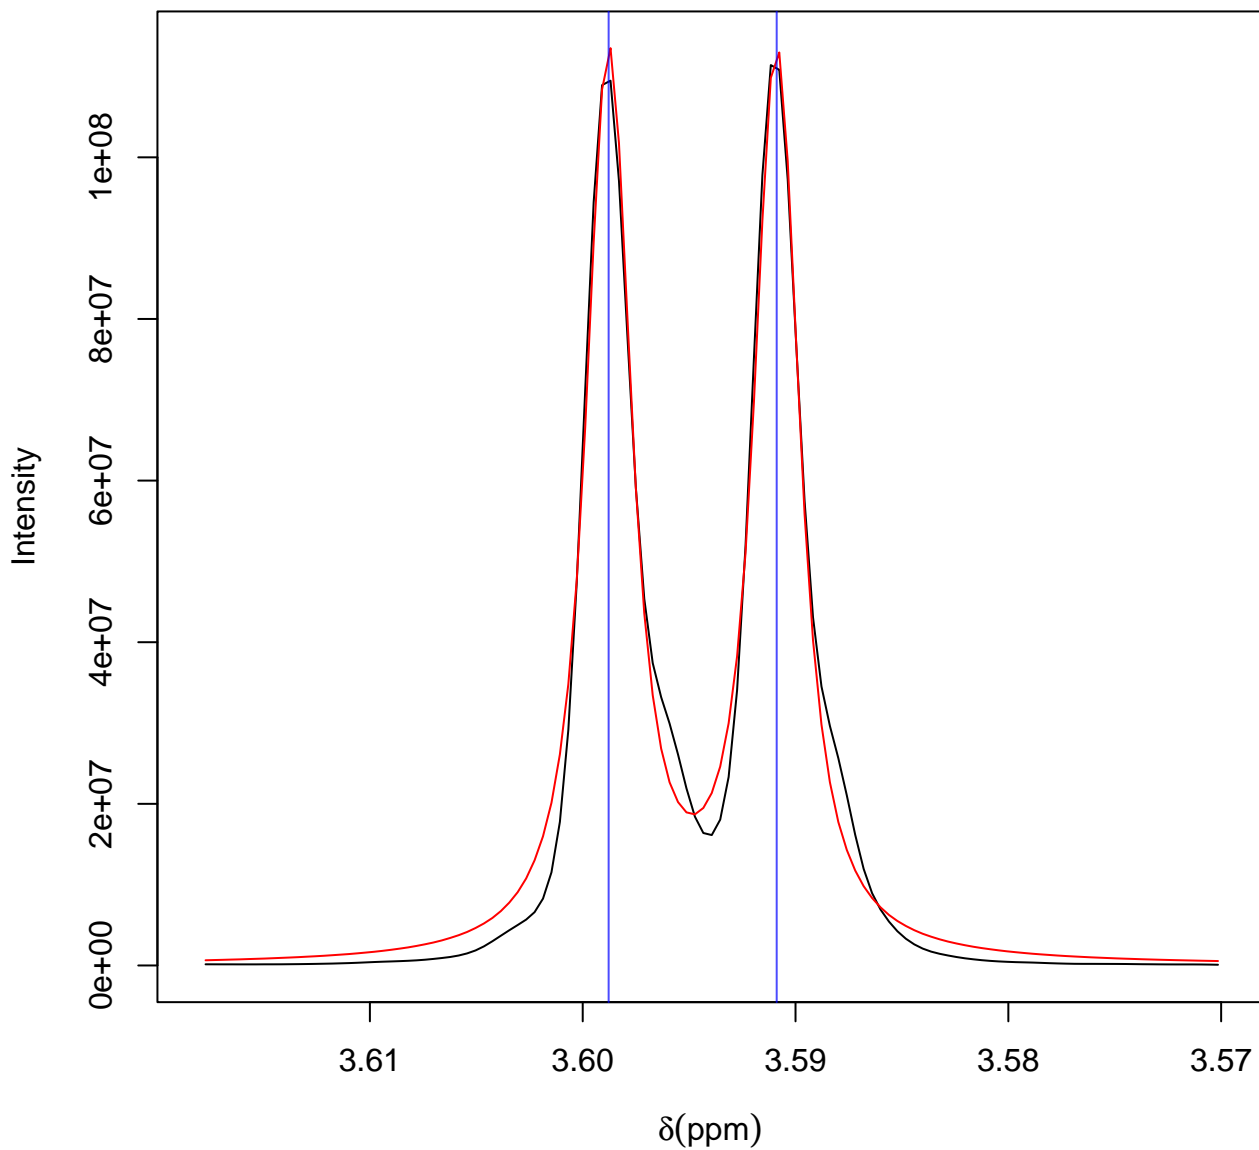

**HB**

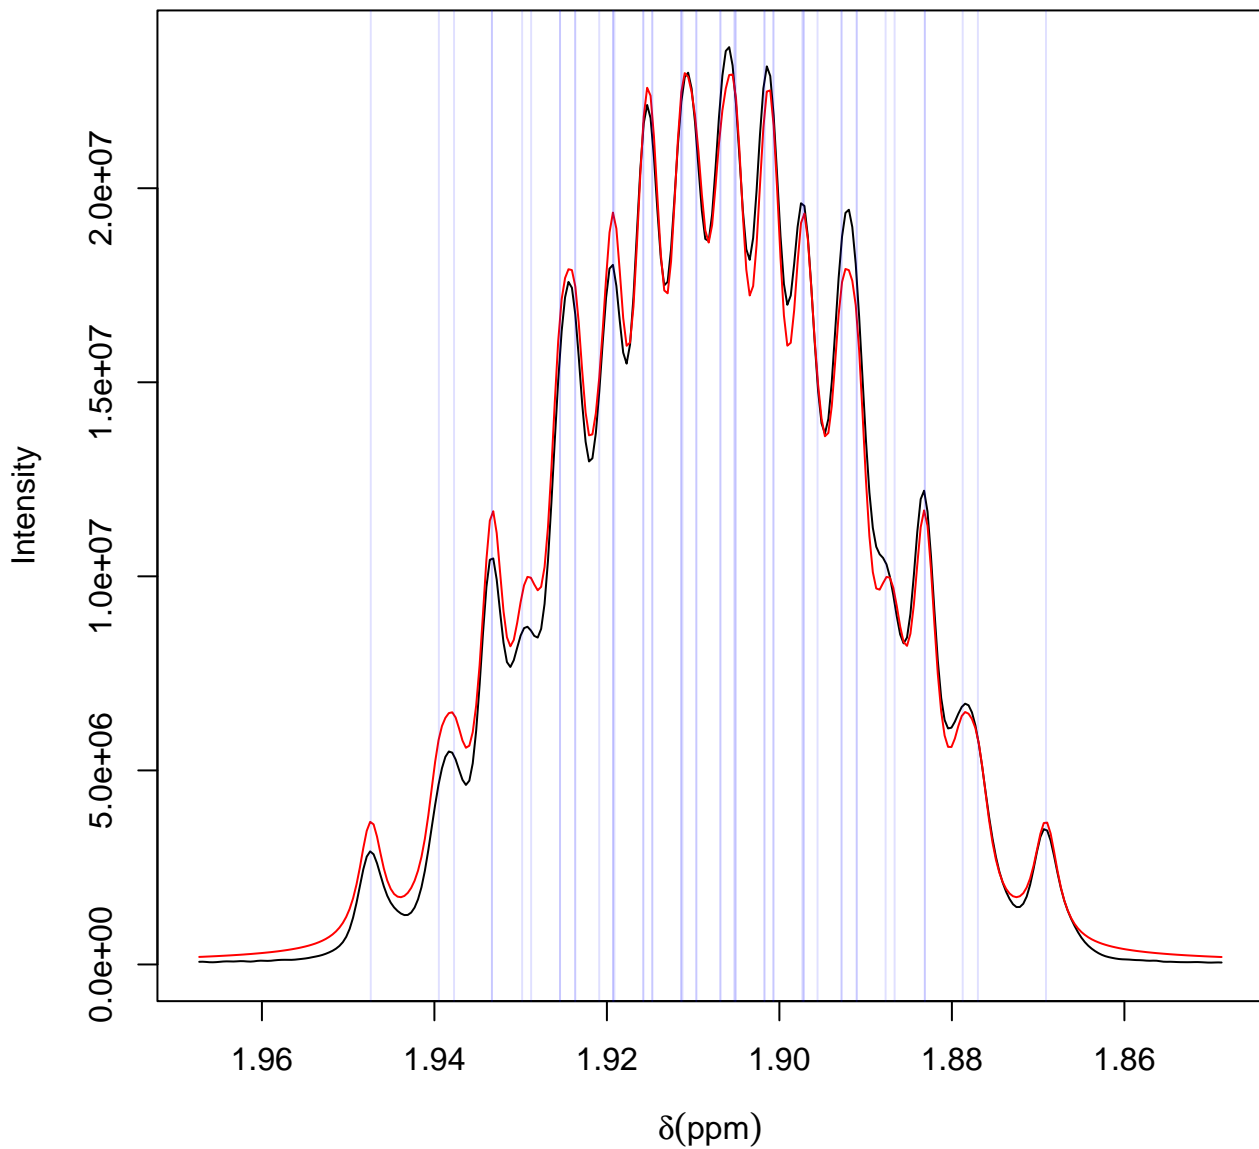

# HG12

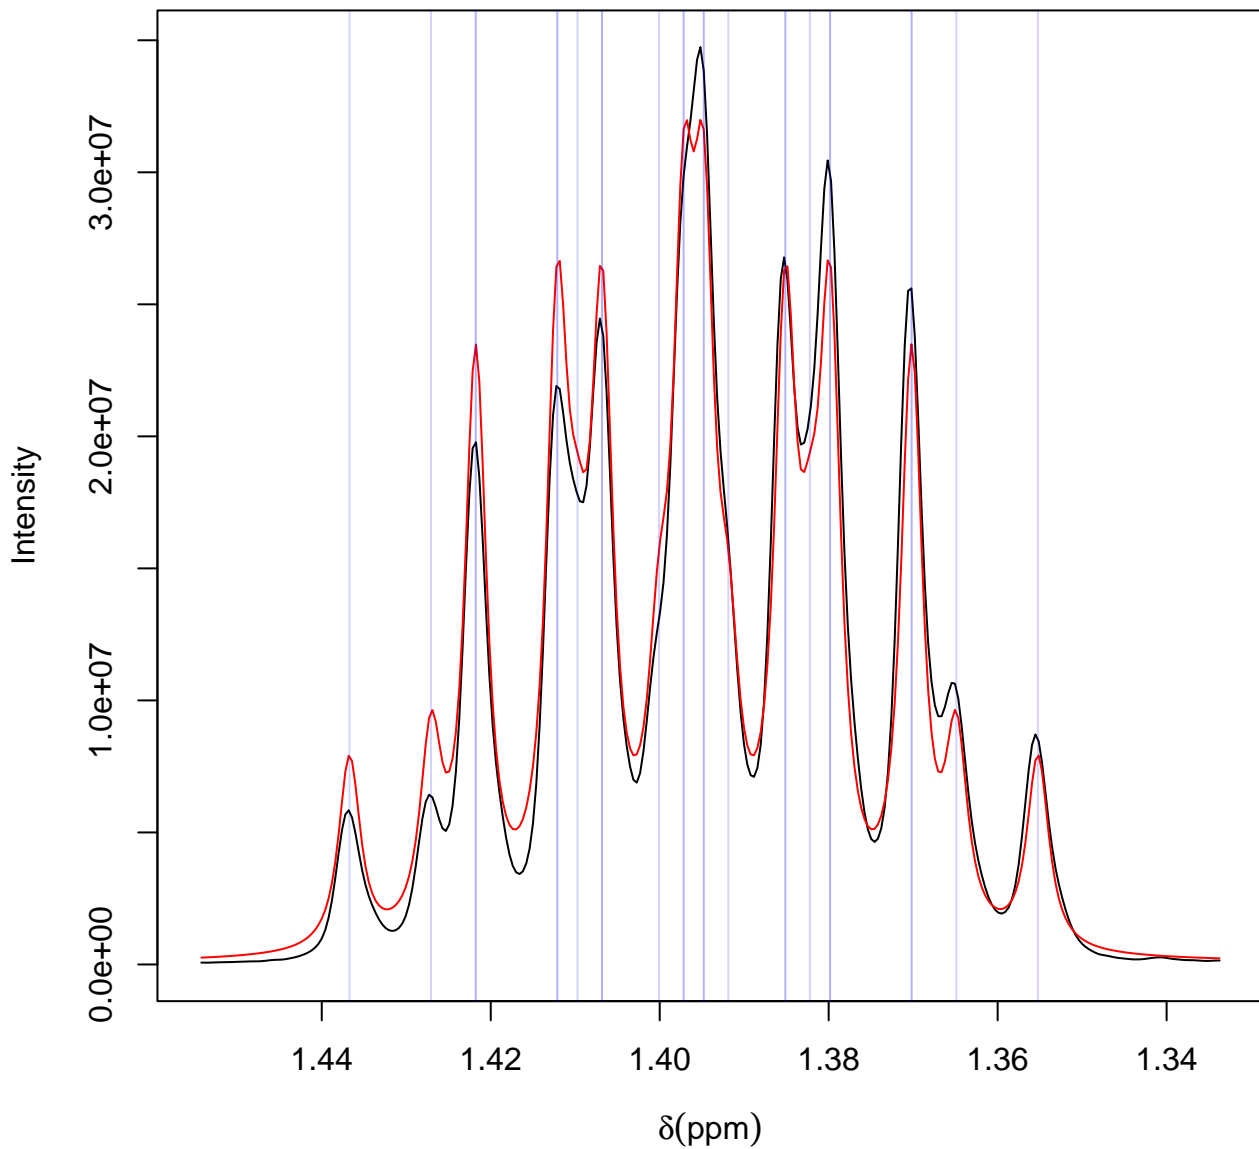

# HG13

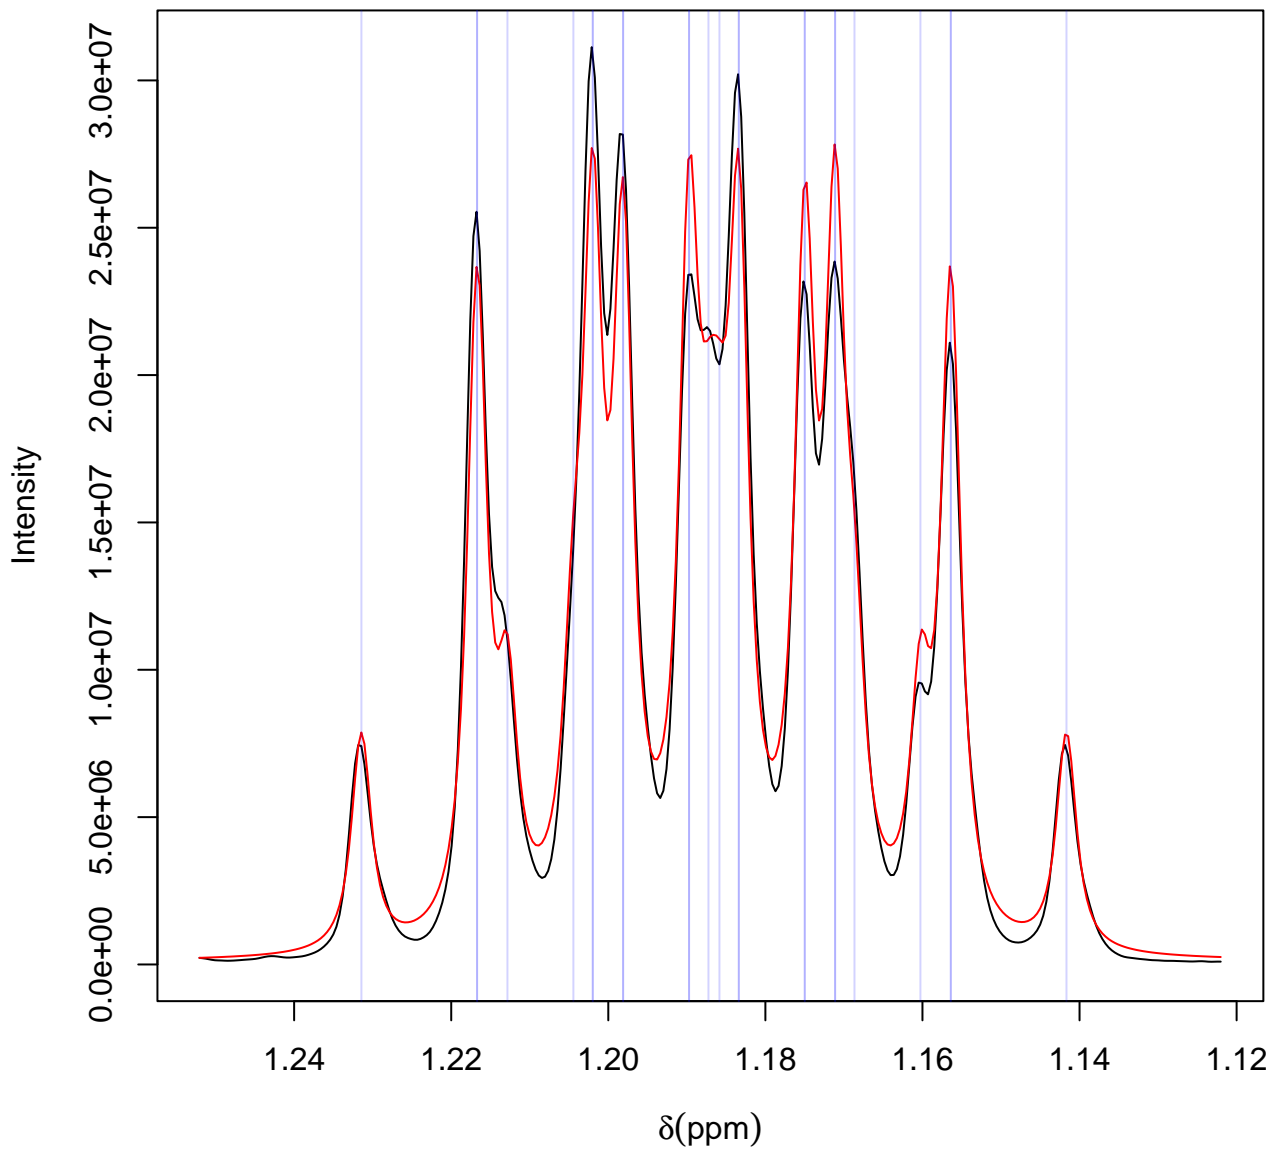

# HG2

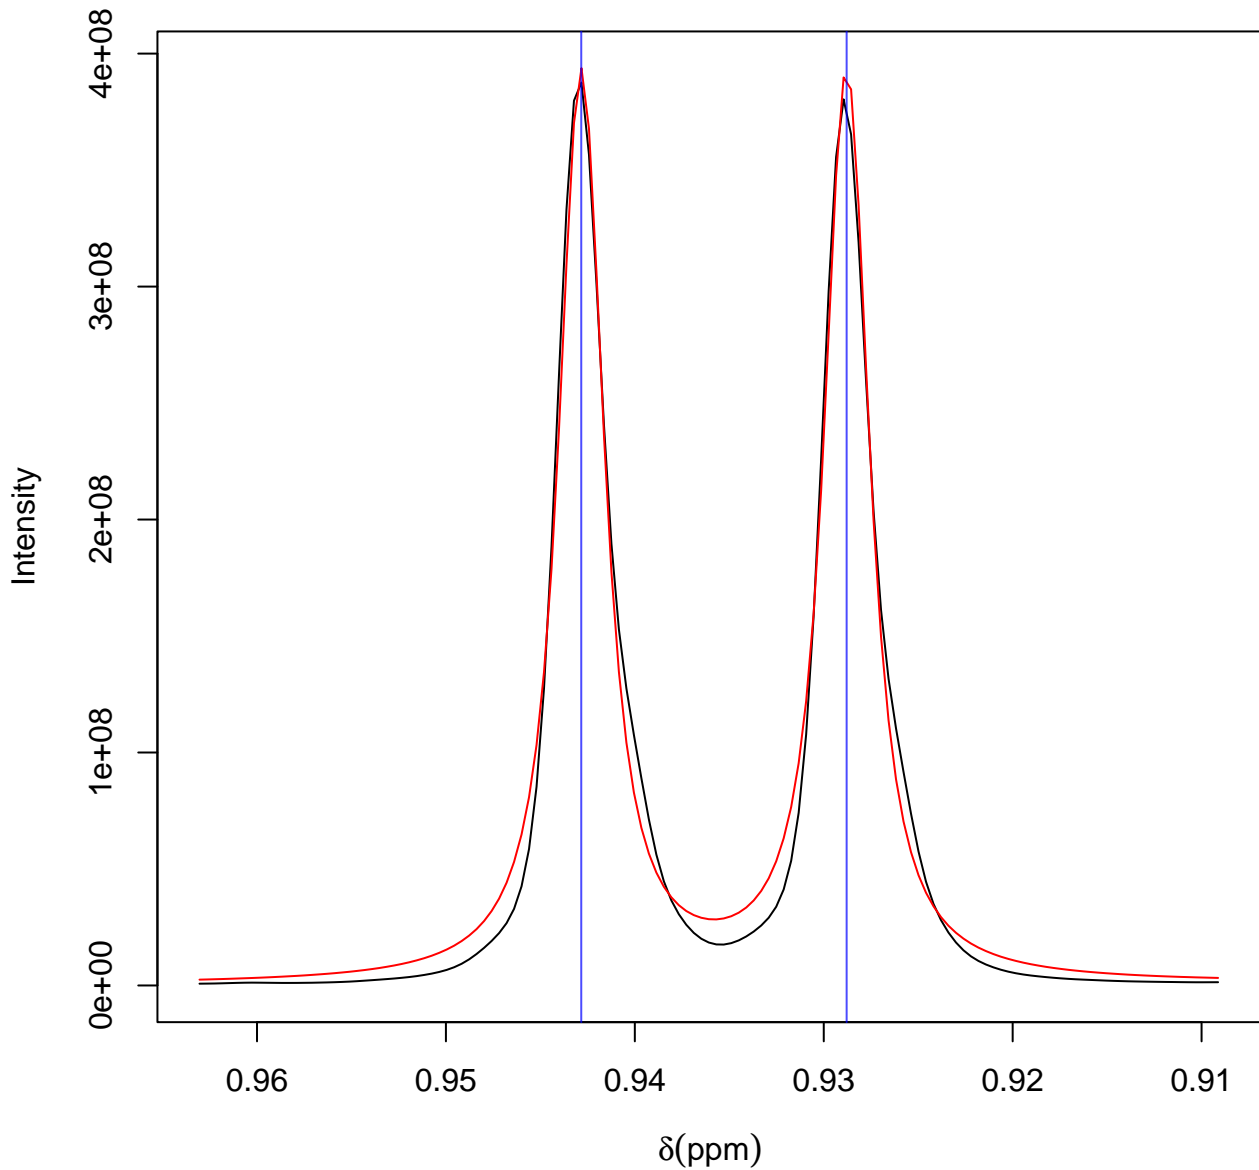

# HD1

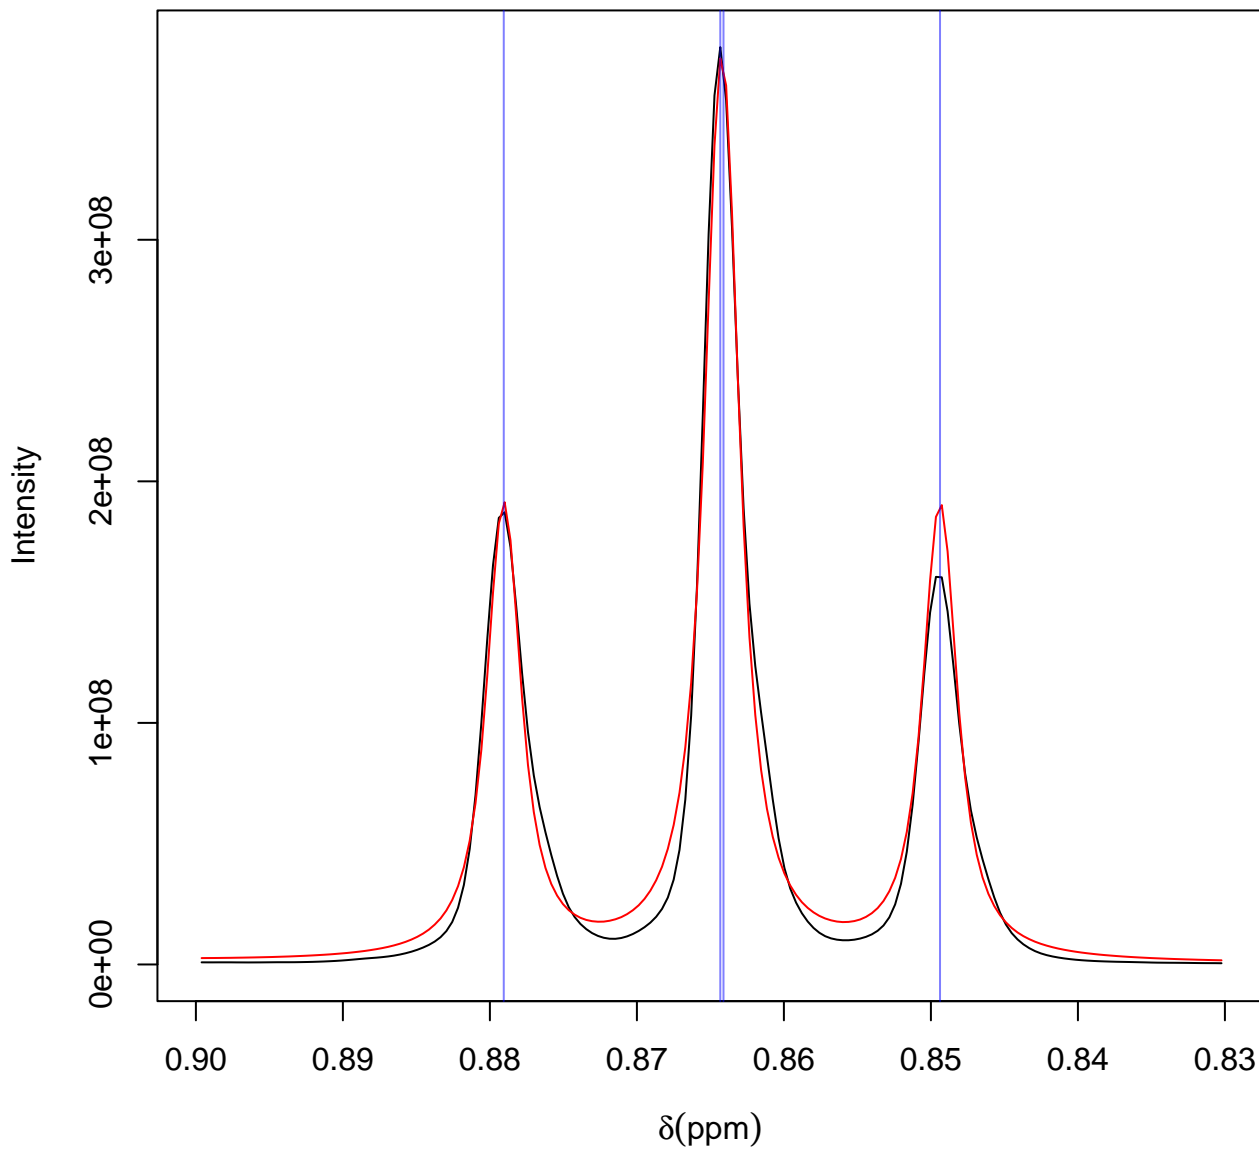

Supplement: Supplementary file 9 [file mr-2024-7-supplement.zip]

HA

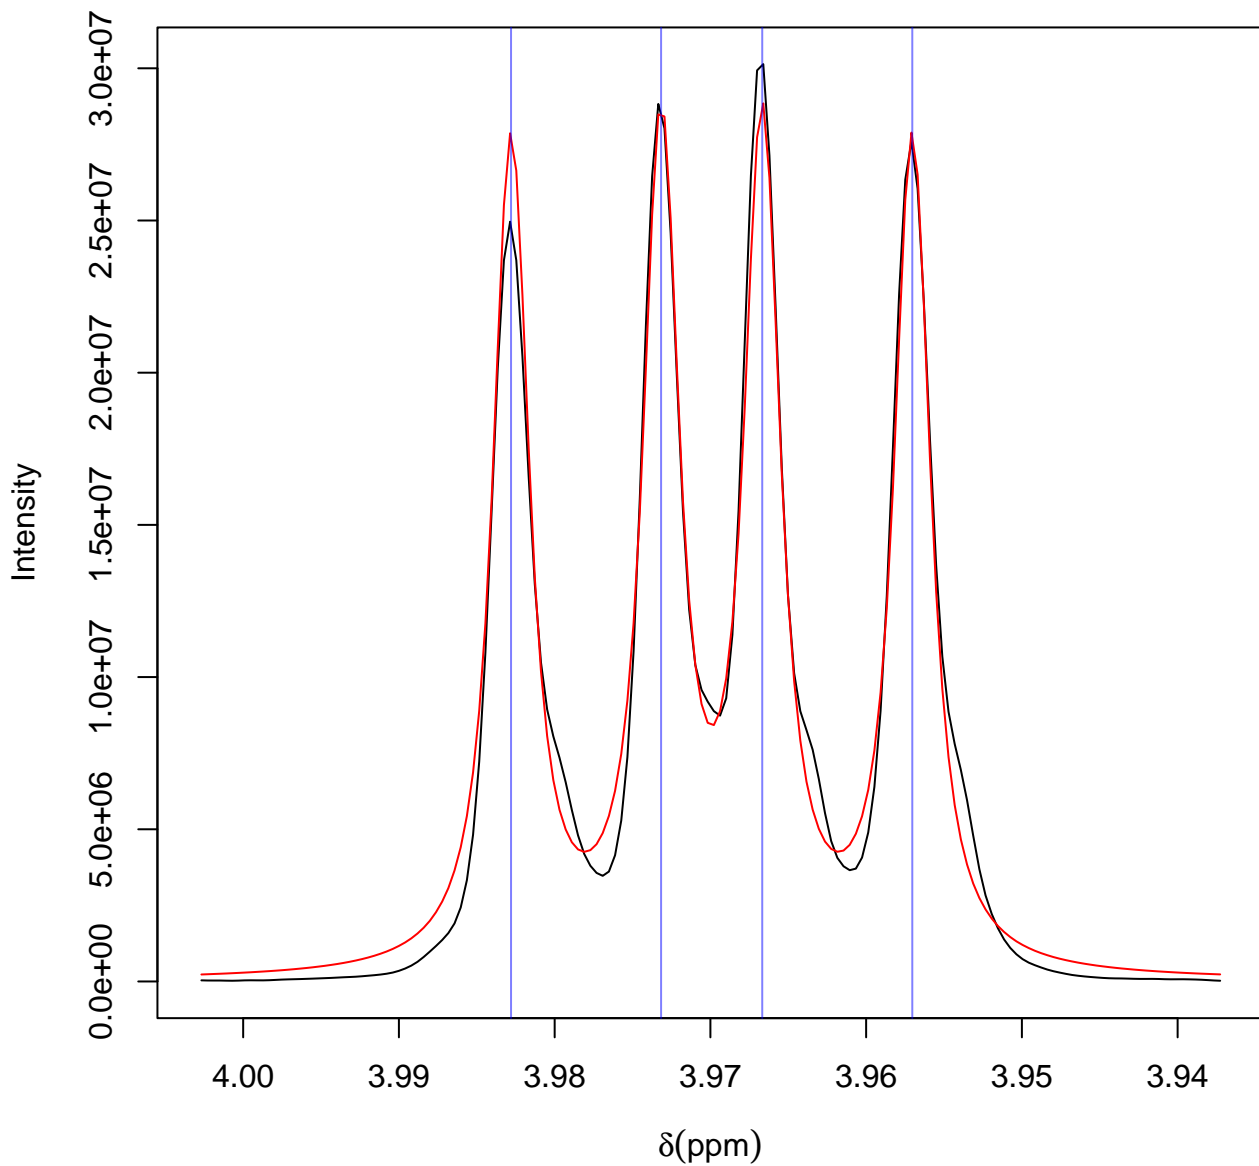

# HB3

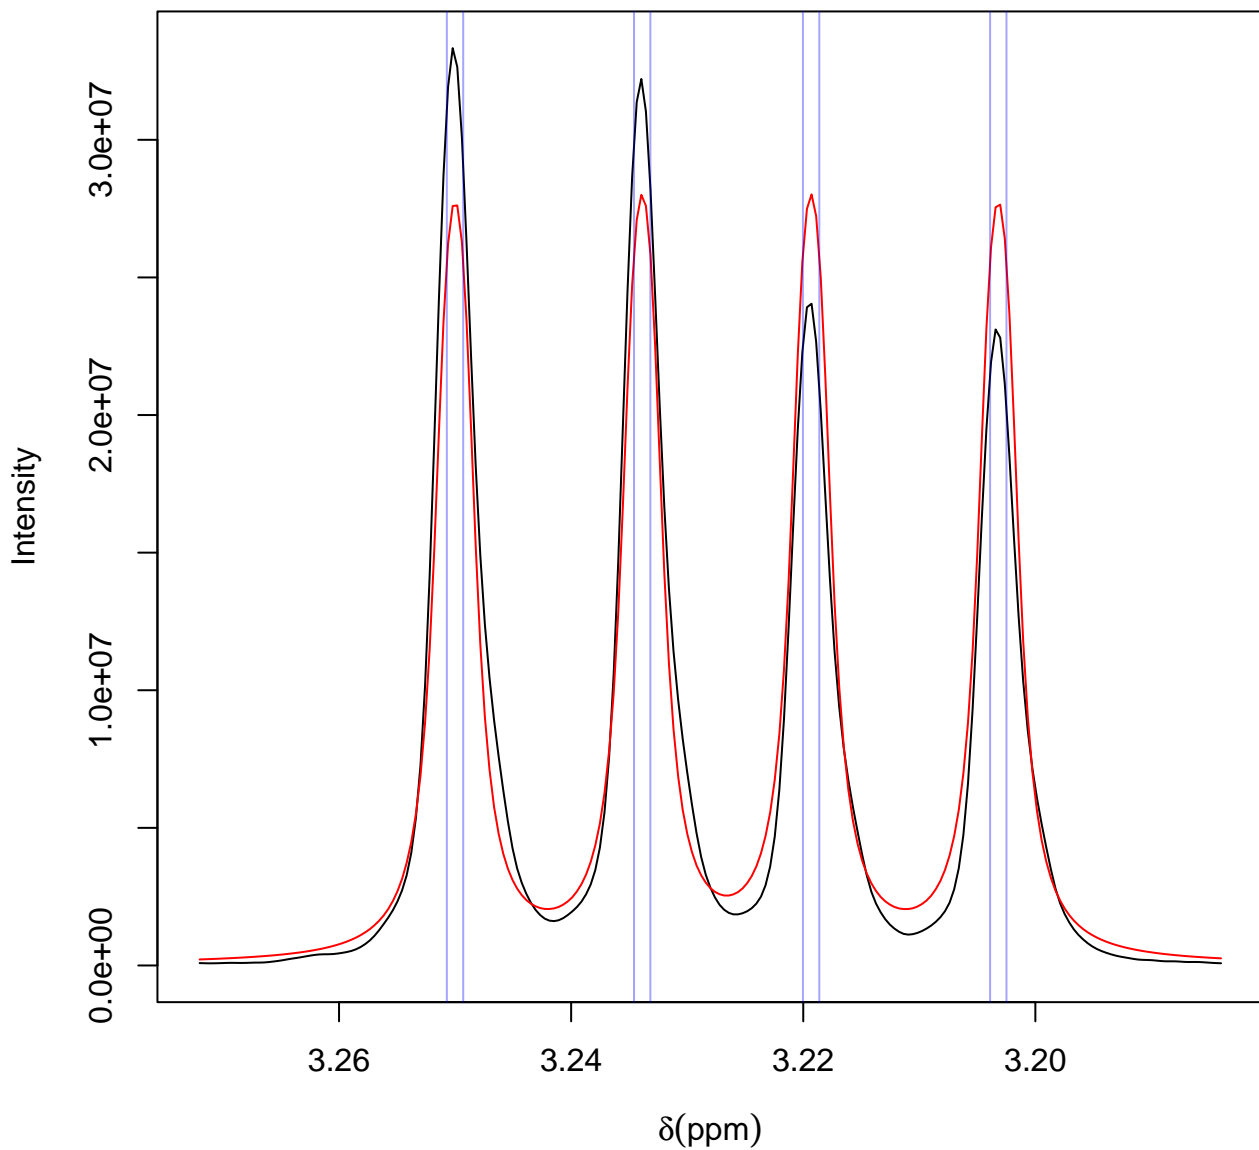

# HB2

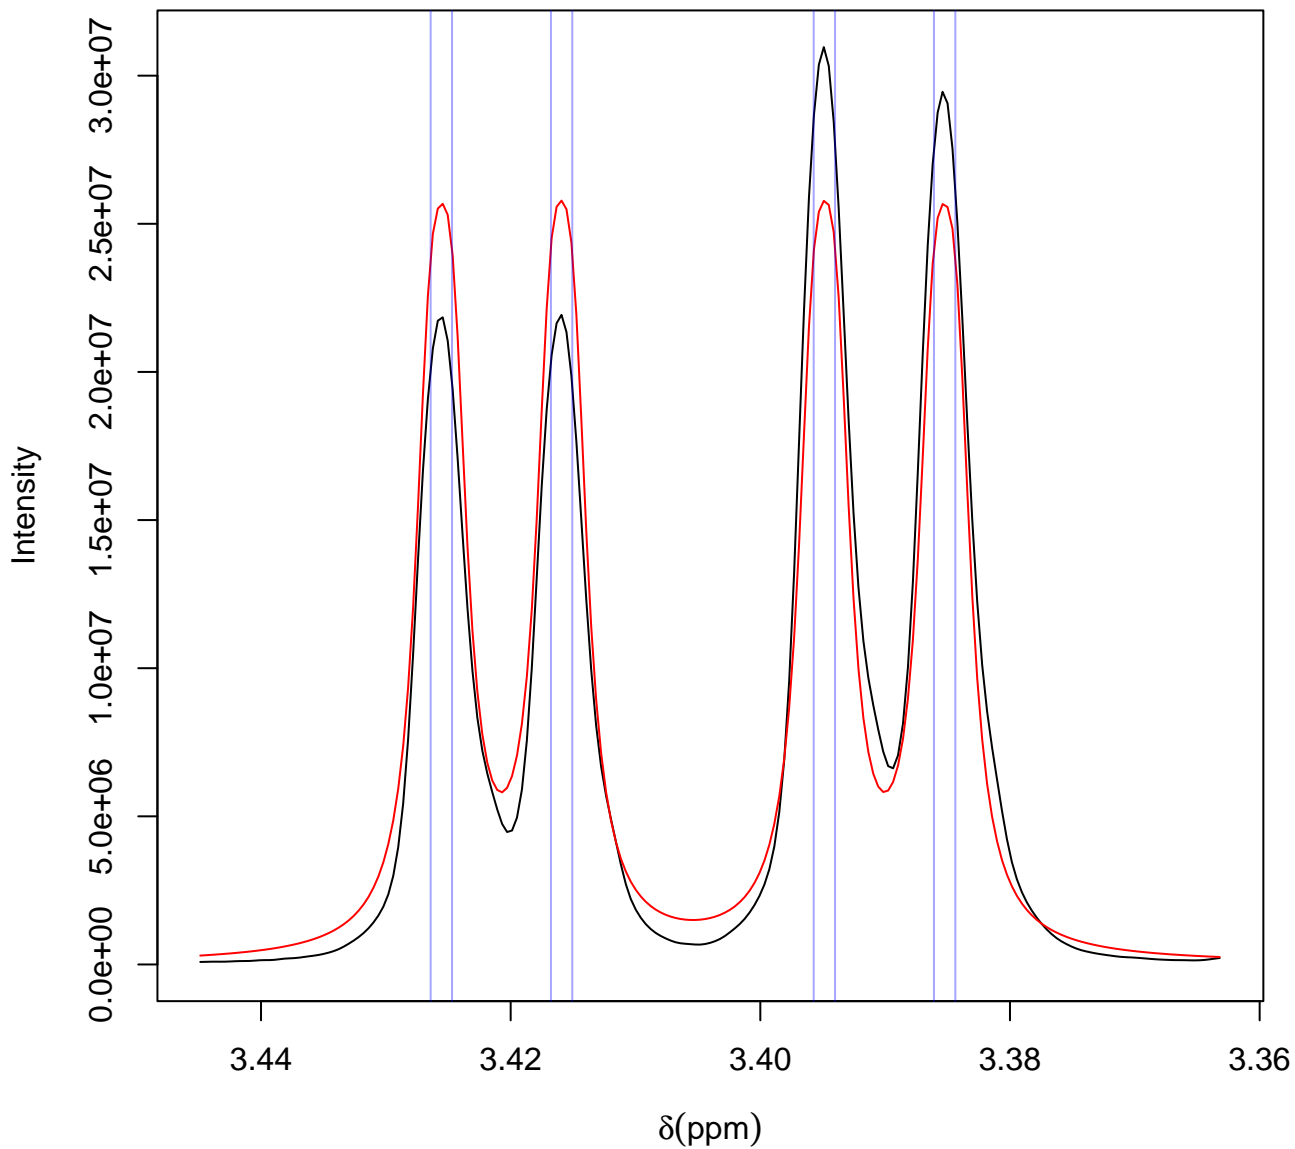

# HD1

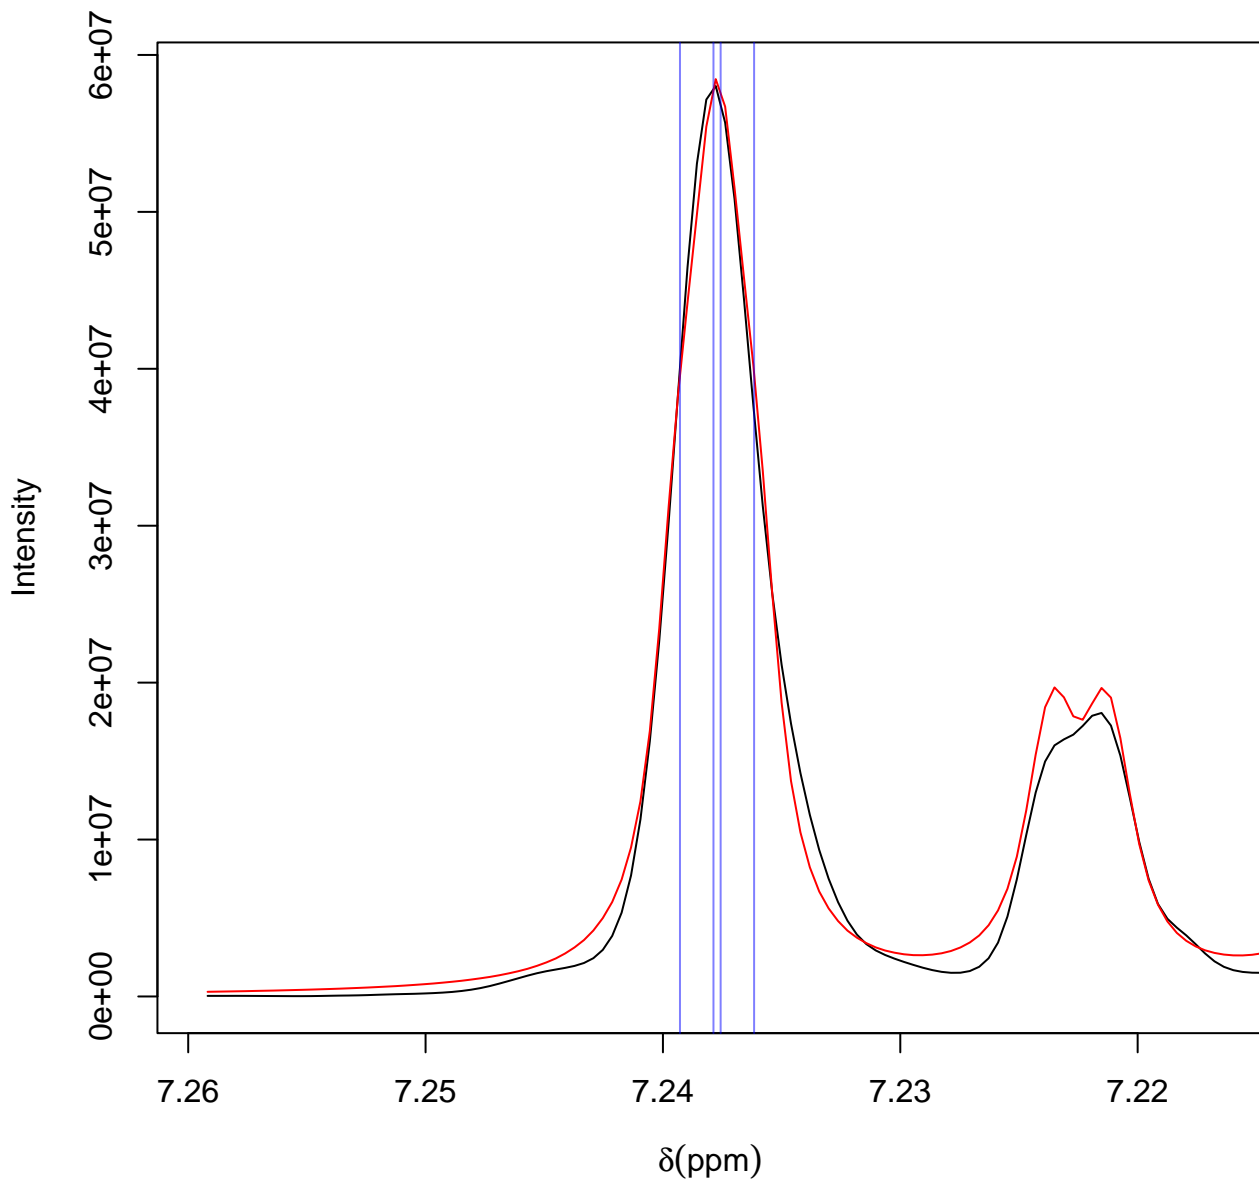

# HE3

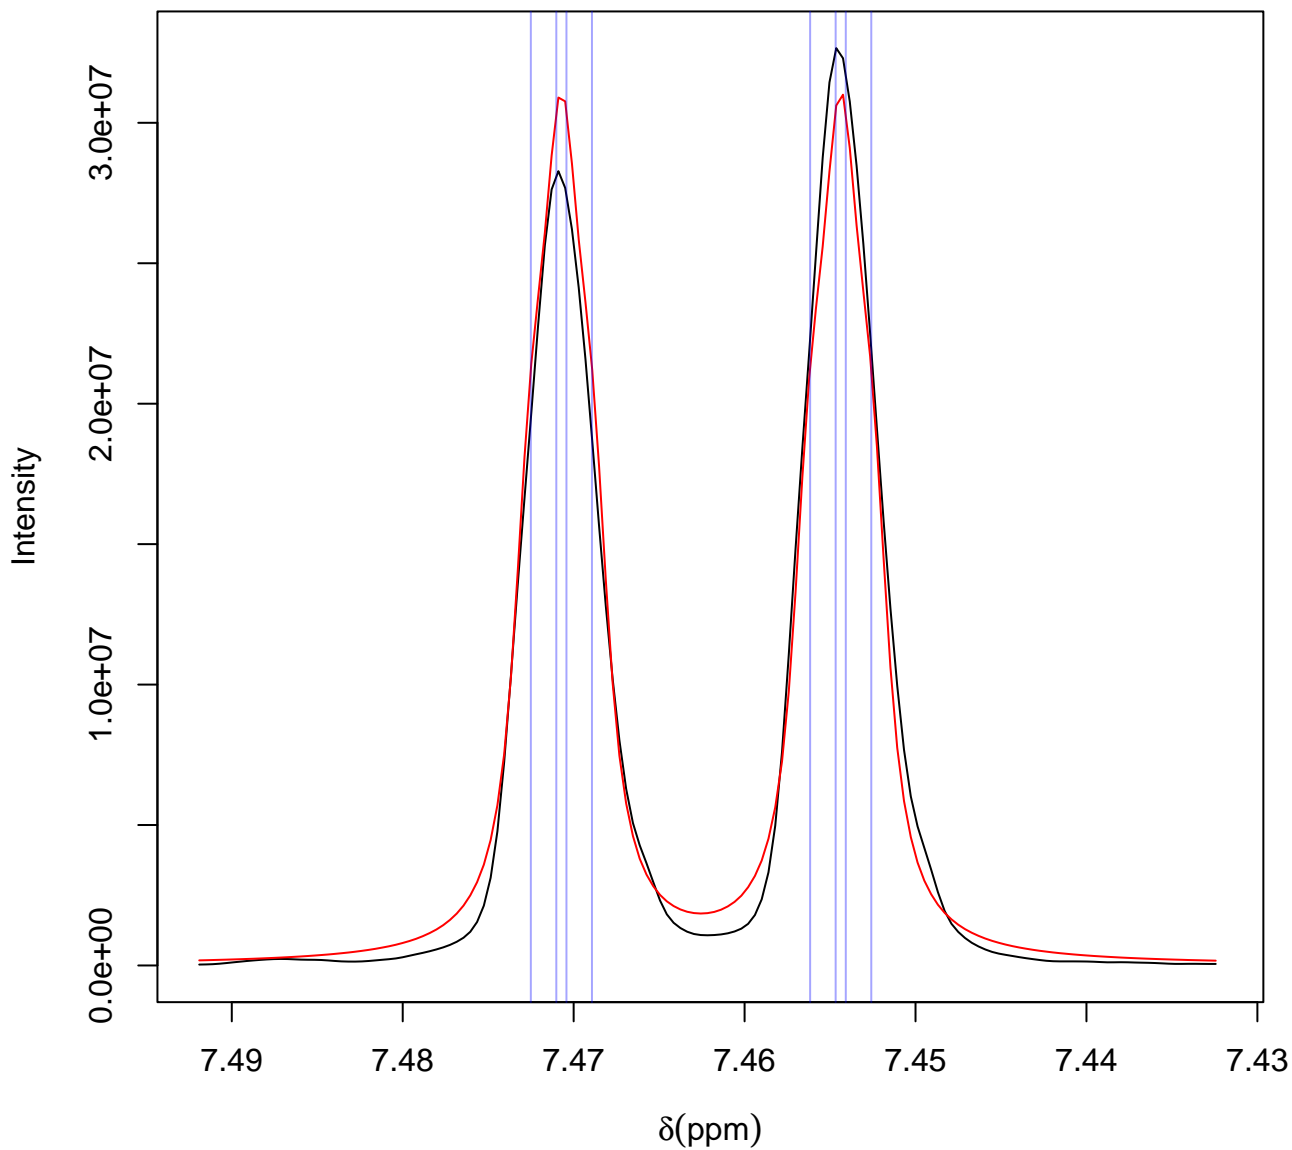

# HZ2

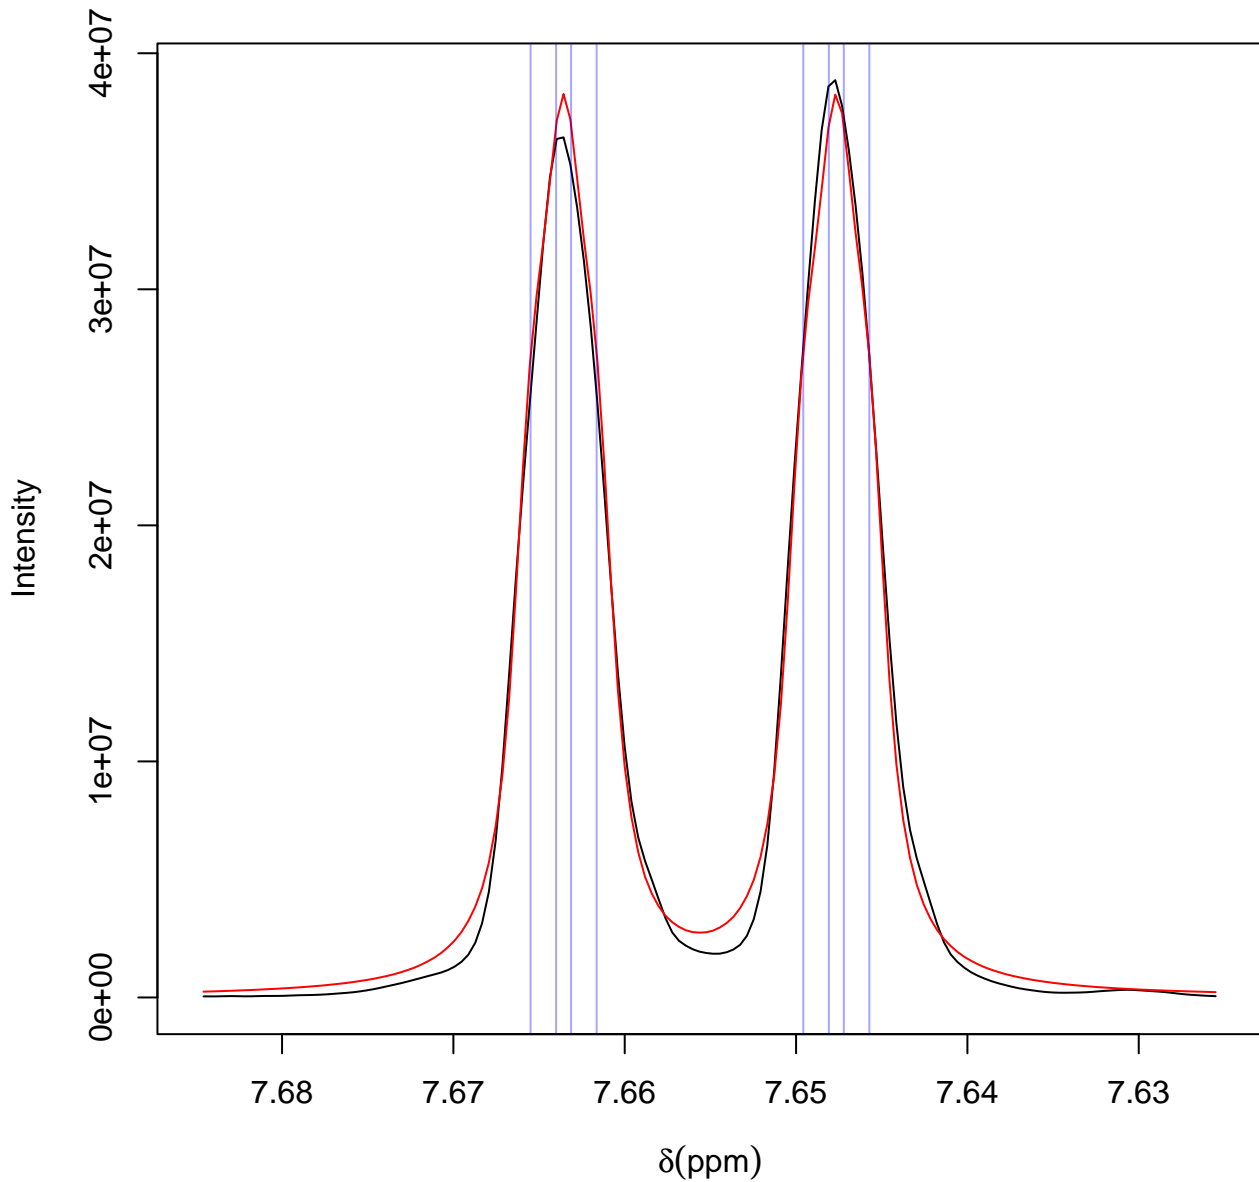

# HZ3

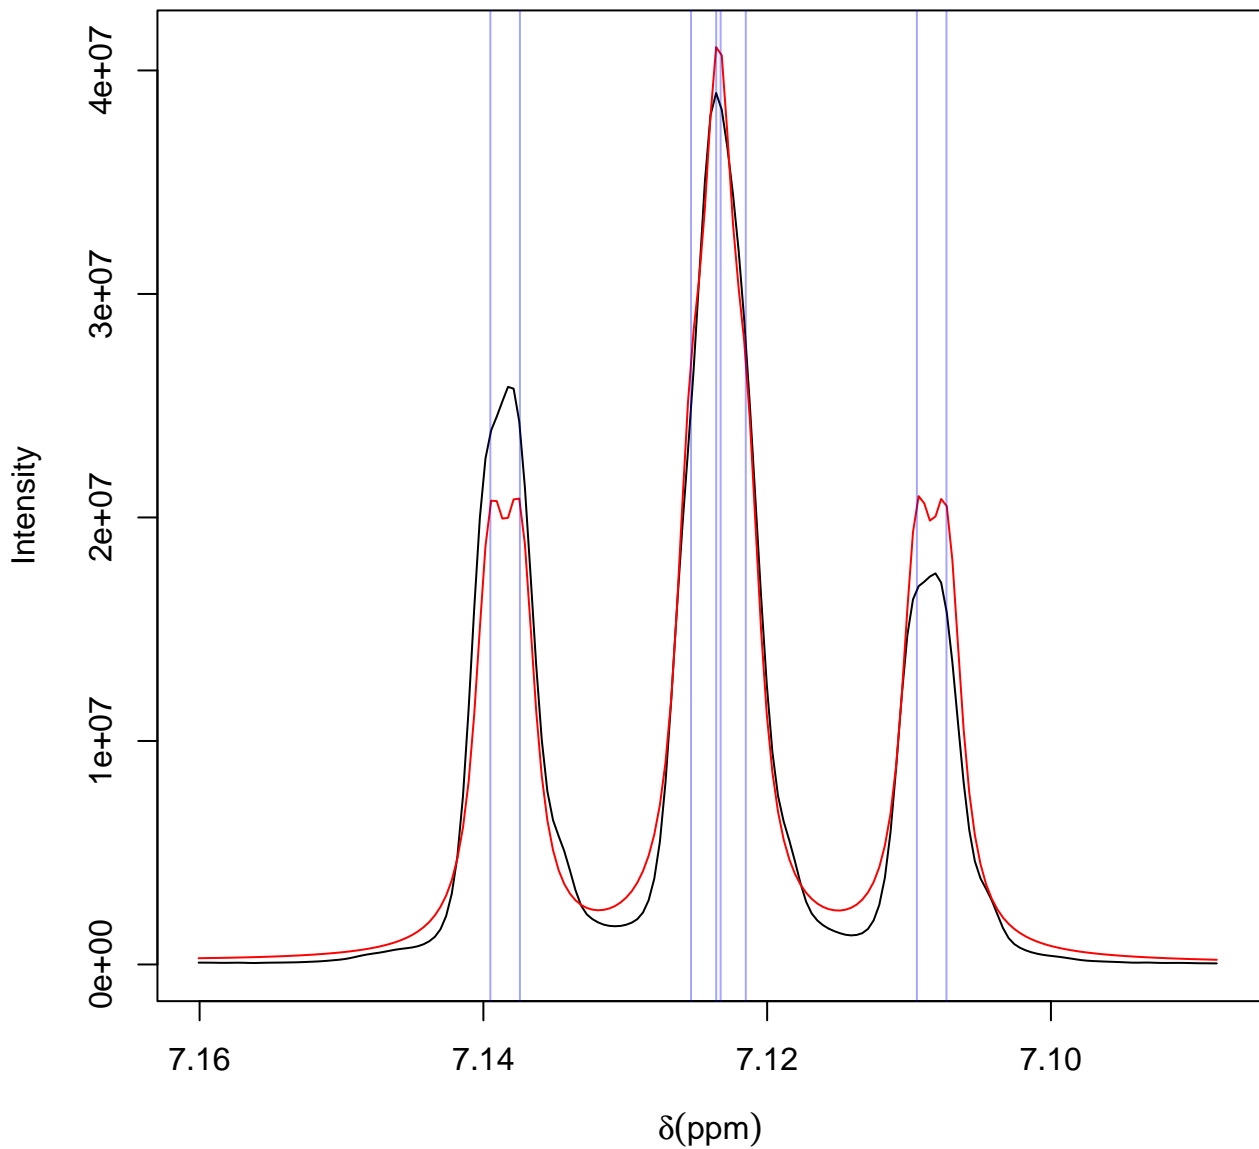

# HH2

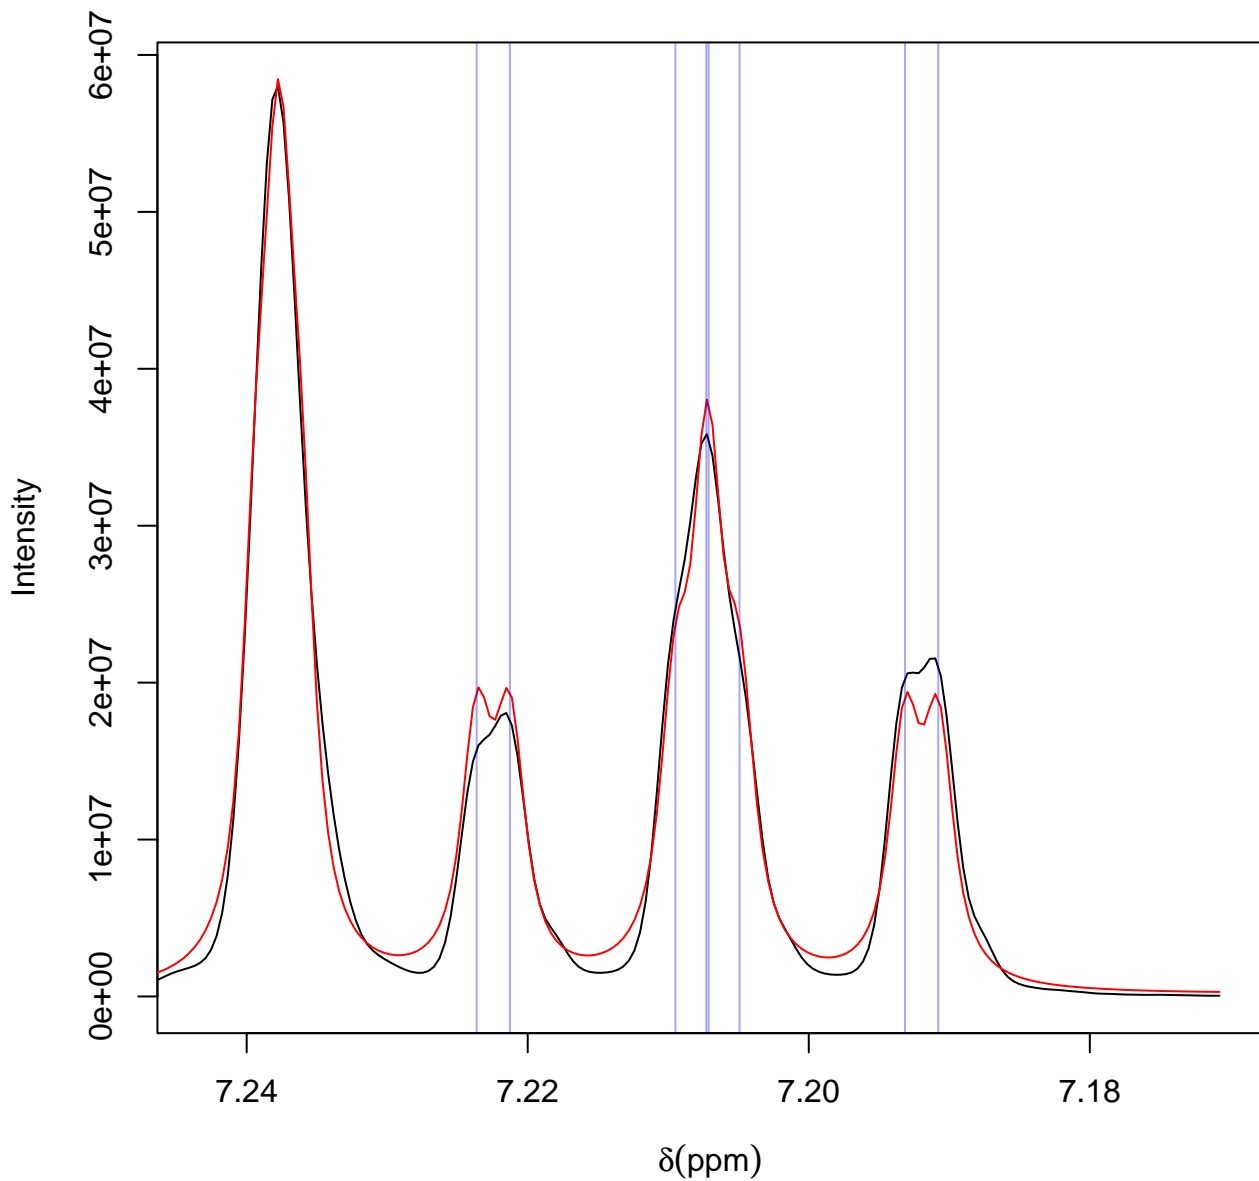

Supplement: Supplementary file 10 [file mr-2024-7-supplement.zip]

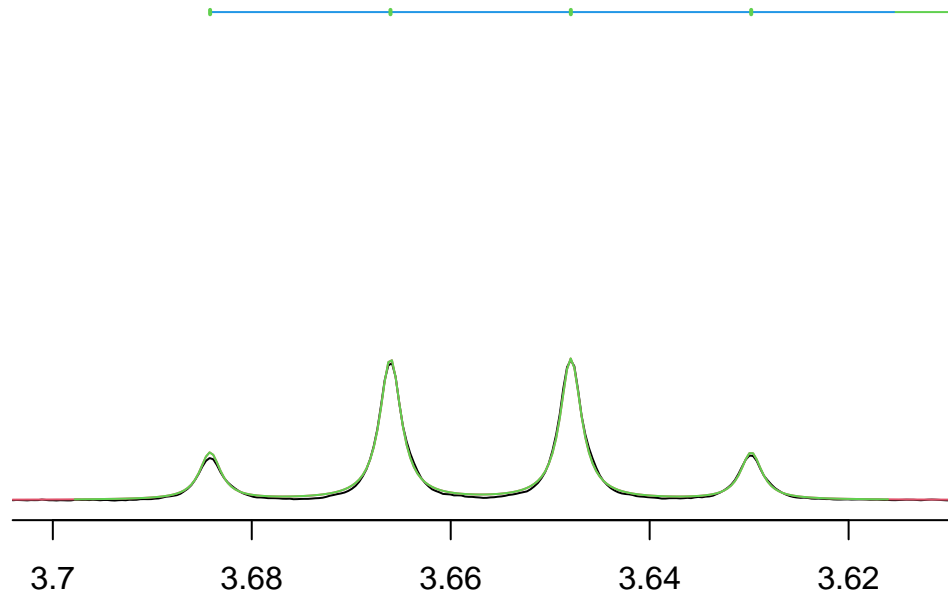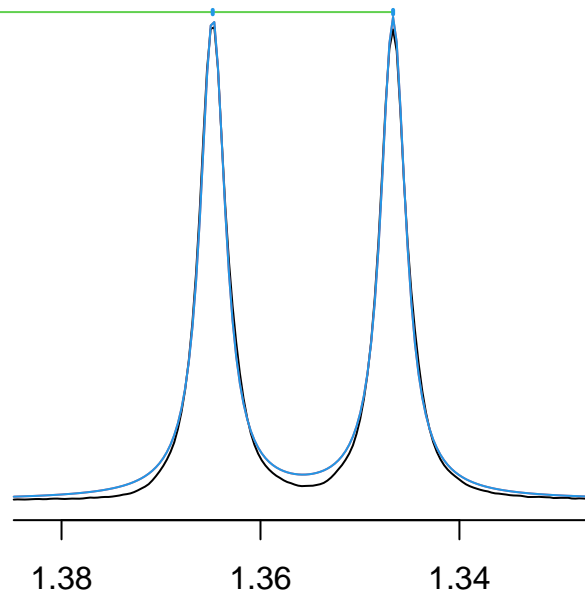

Supplement: Supplementary file 11 [file mr-2024-7-supplement.zip]

HA

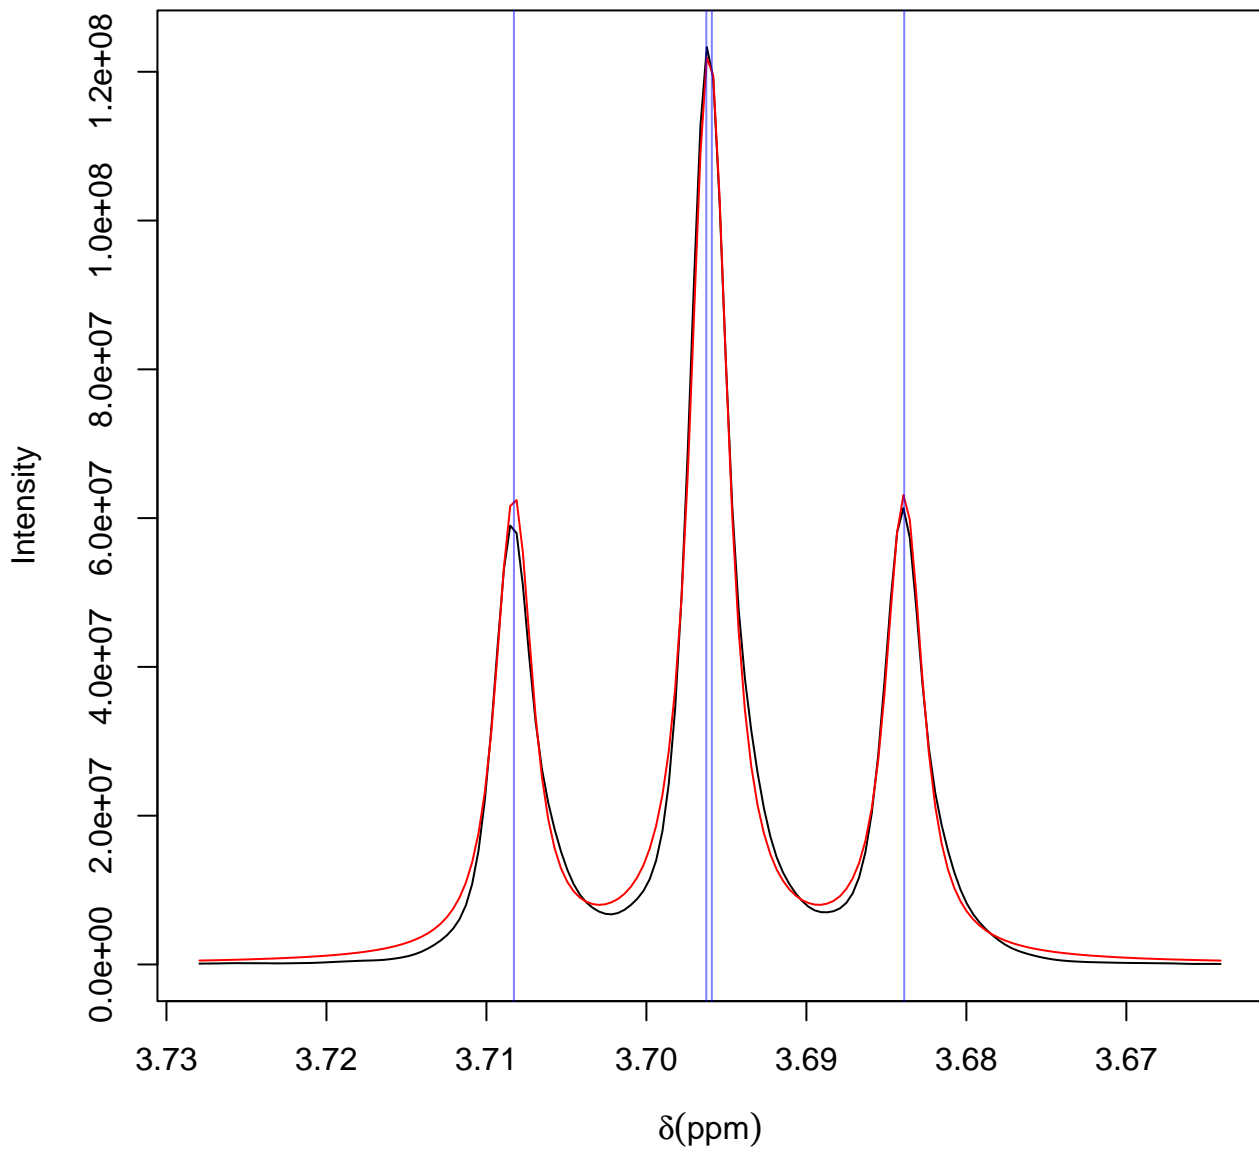

# HB3

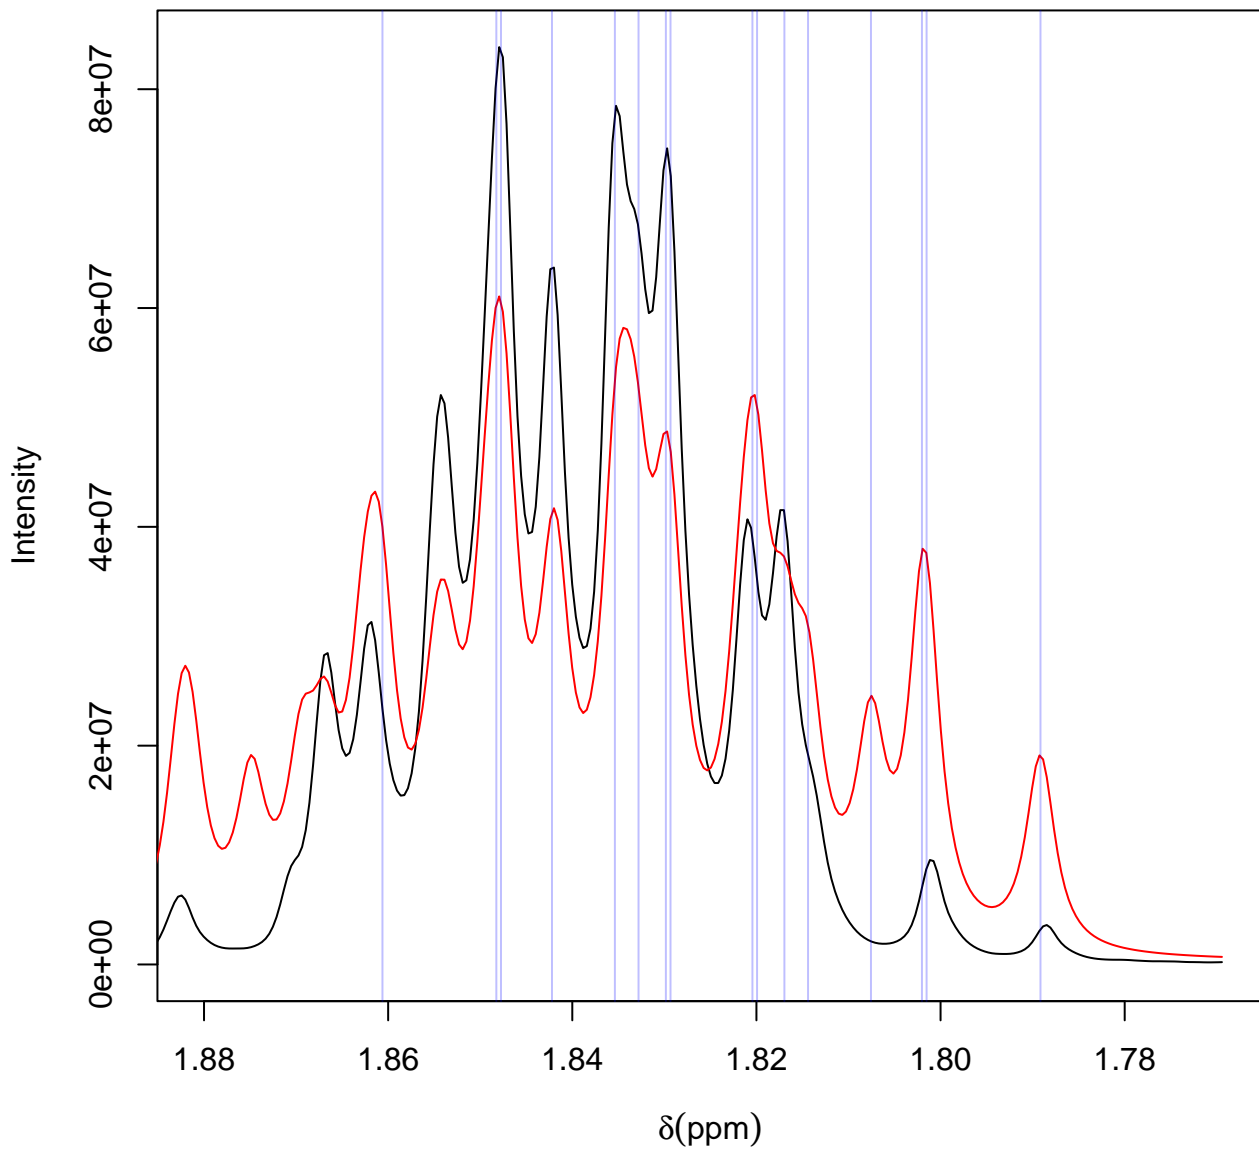

# HB2

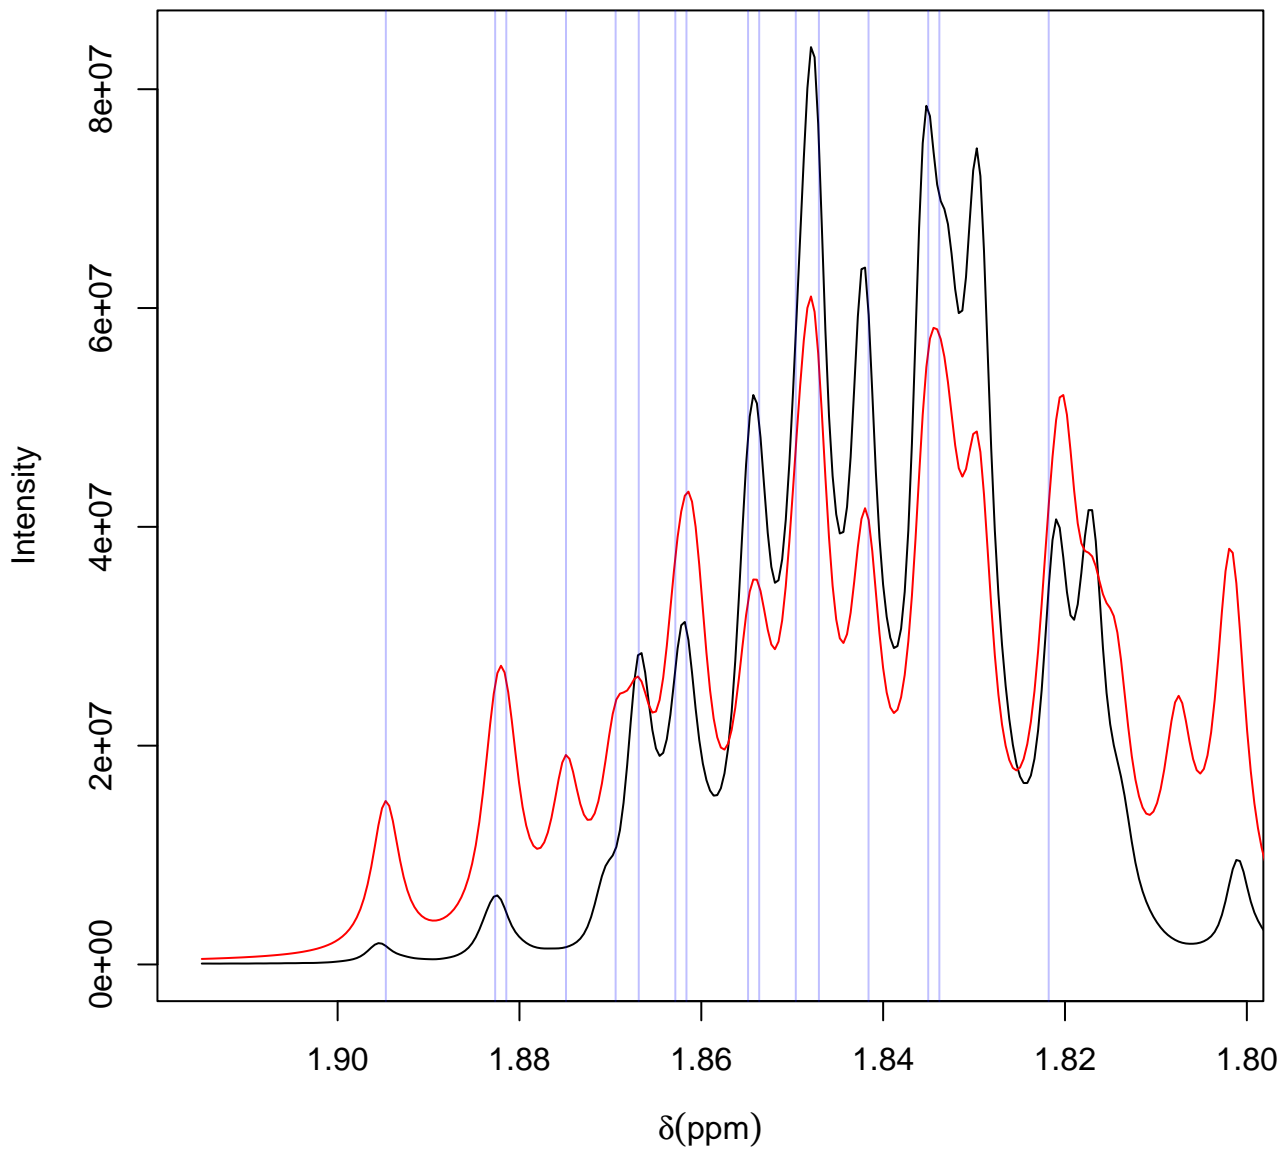

# HG3

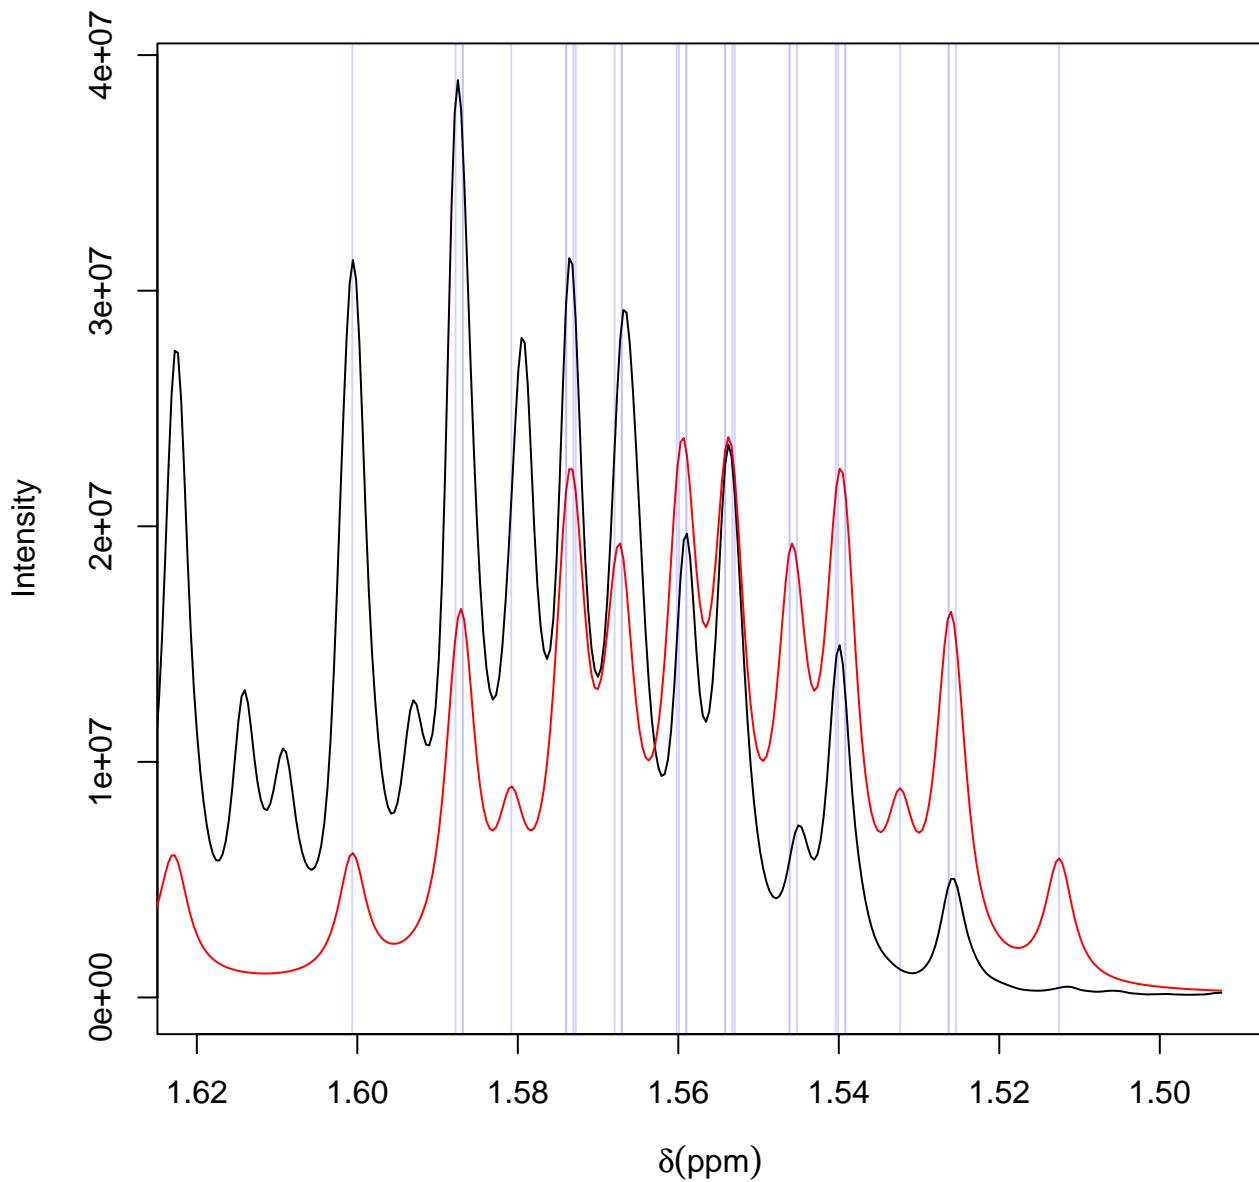

# HG2

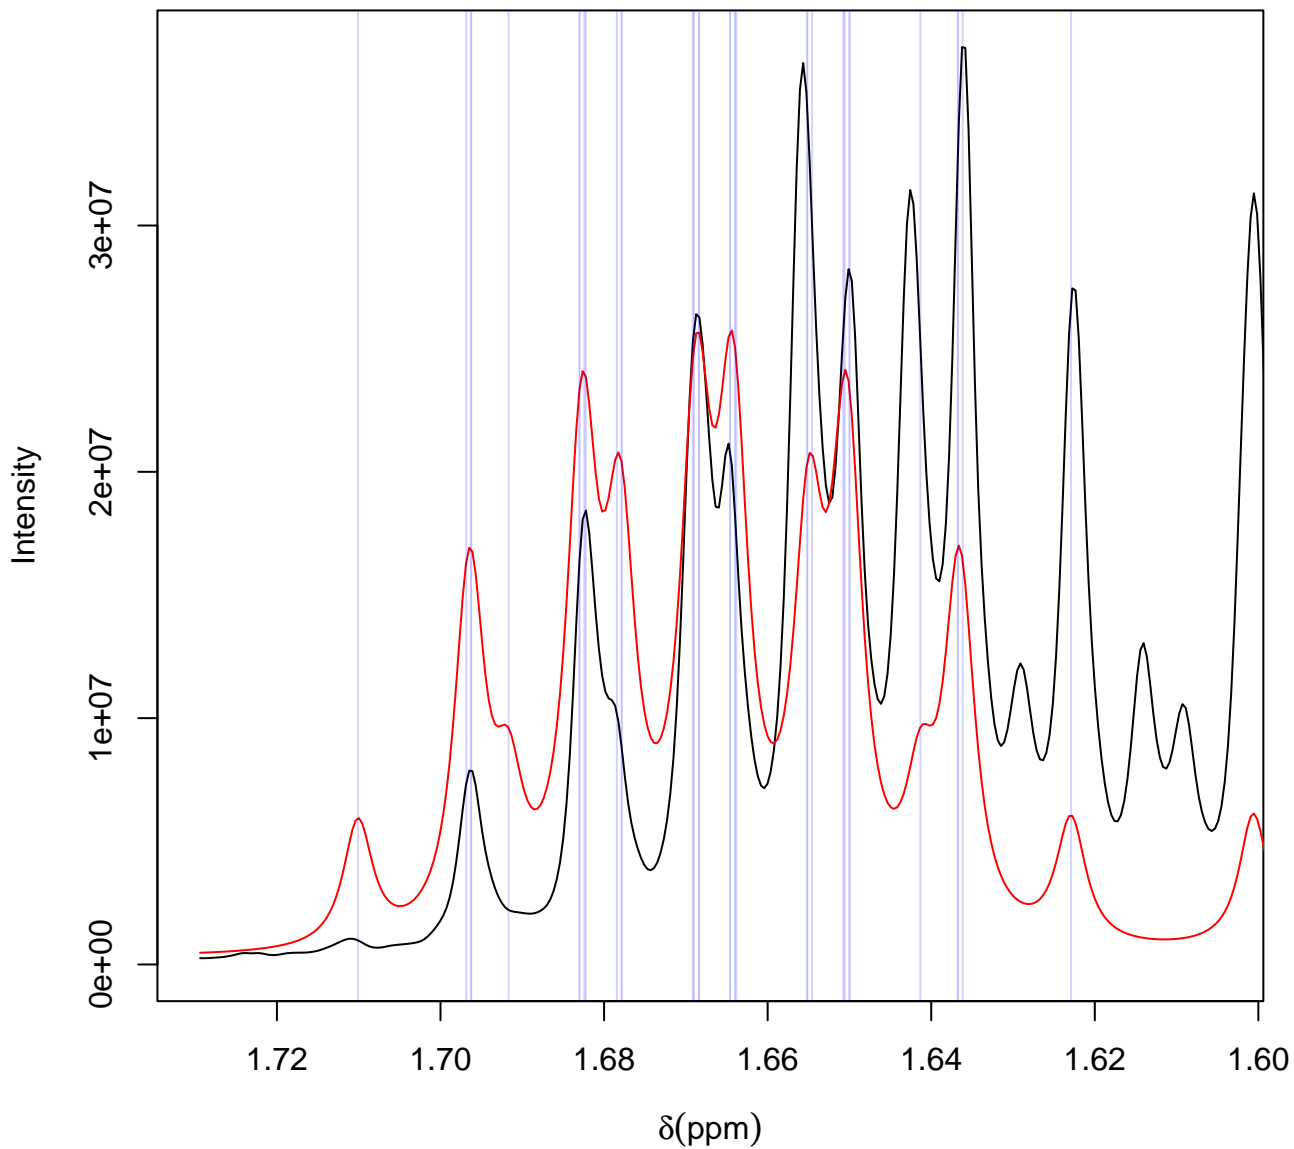

# HD2/3

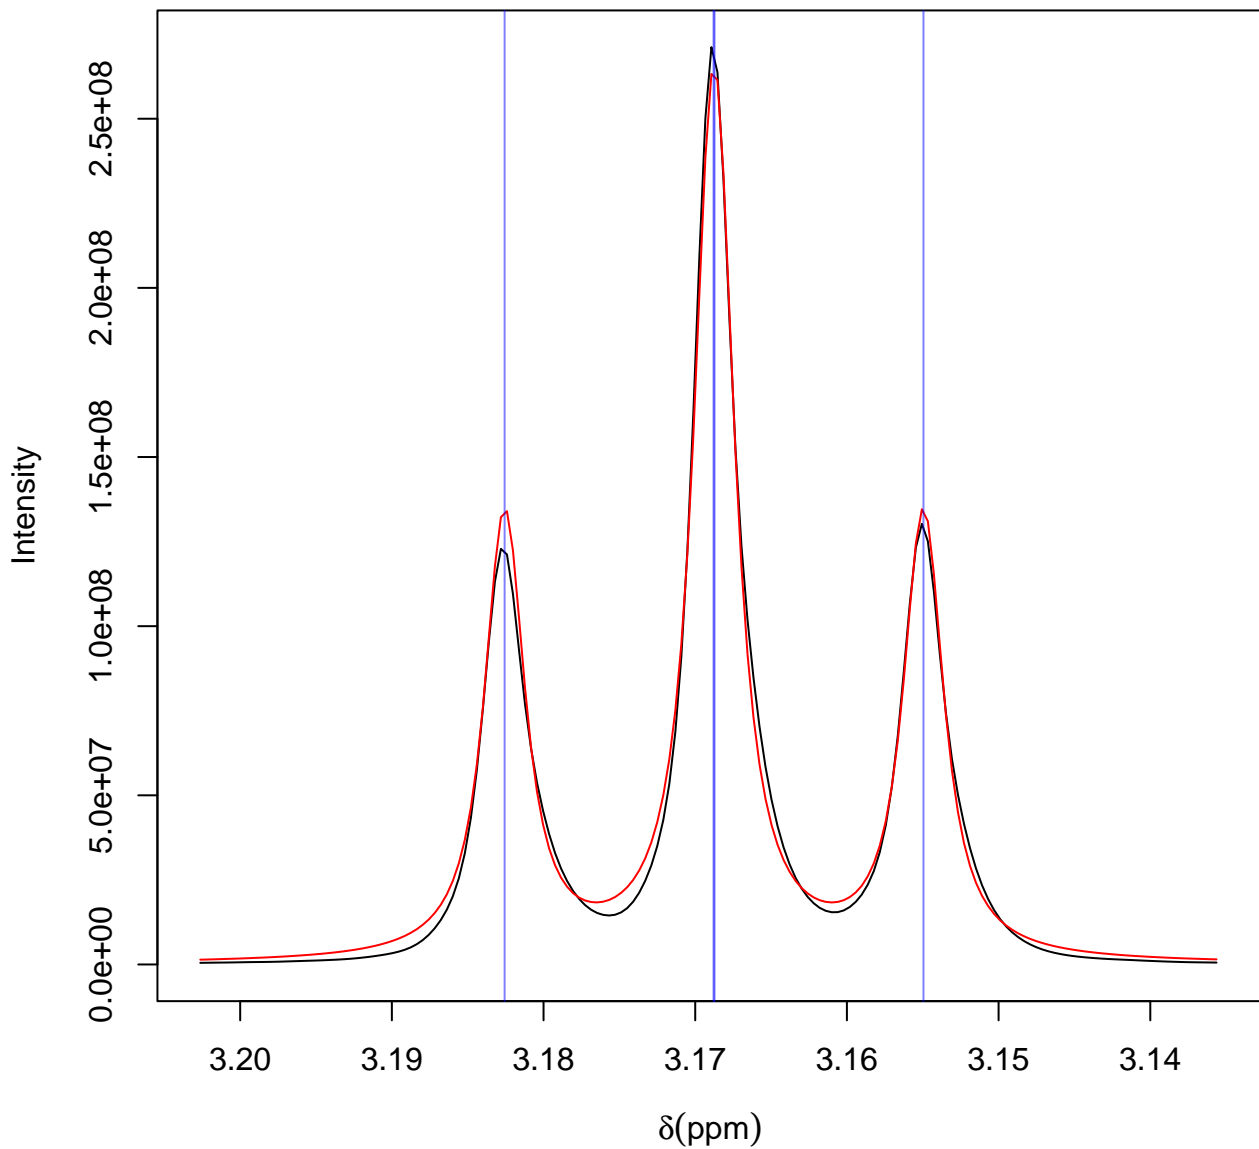

Supplement: Supplementary file 12 [file mr-2024-7-supplement.zip]

HA

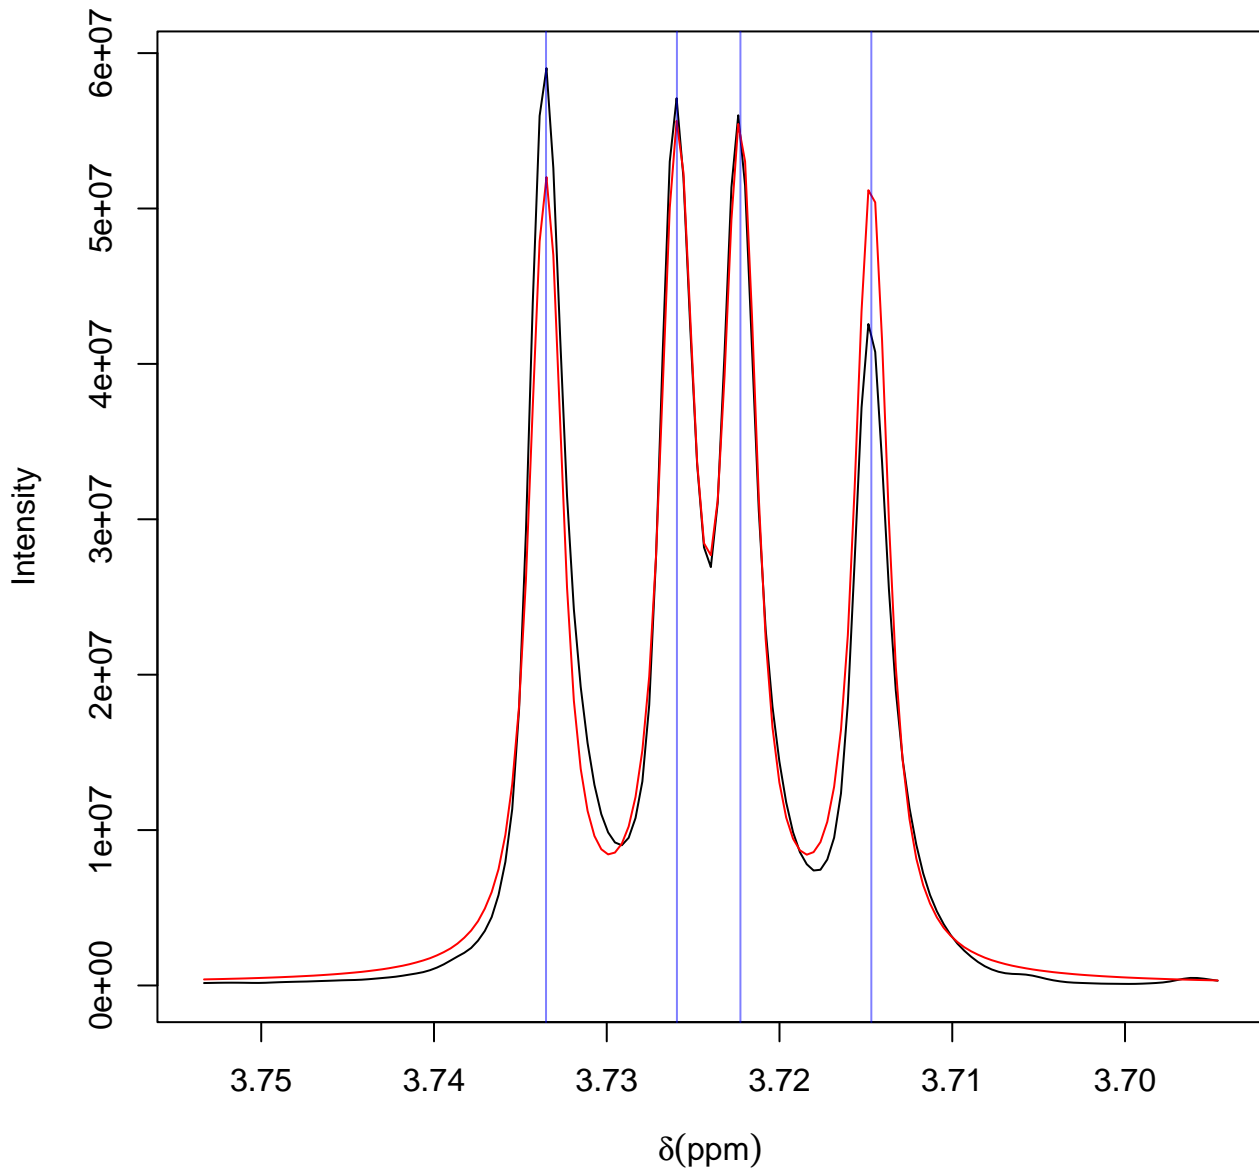

# HB2

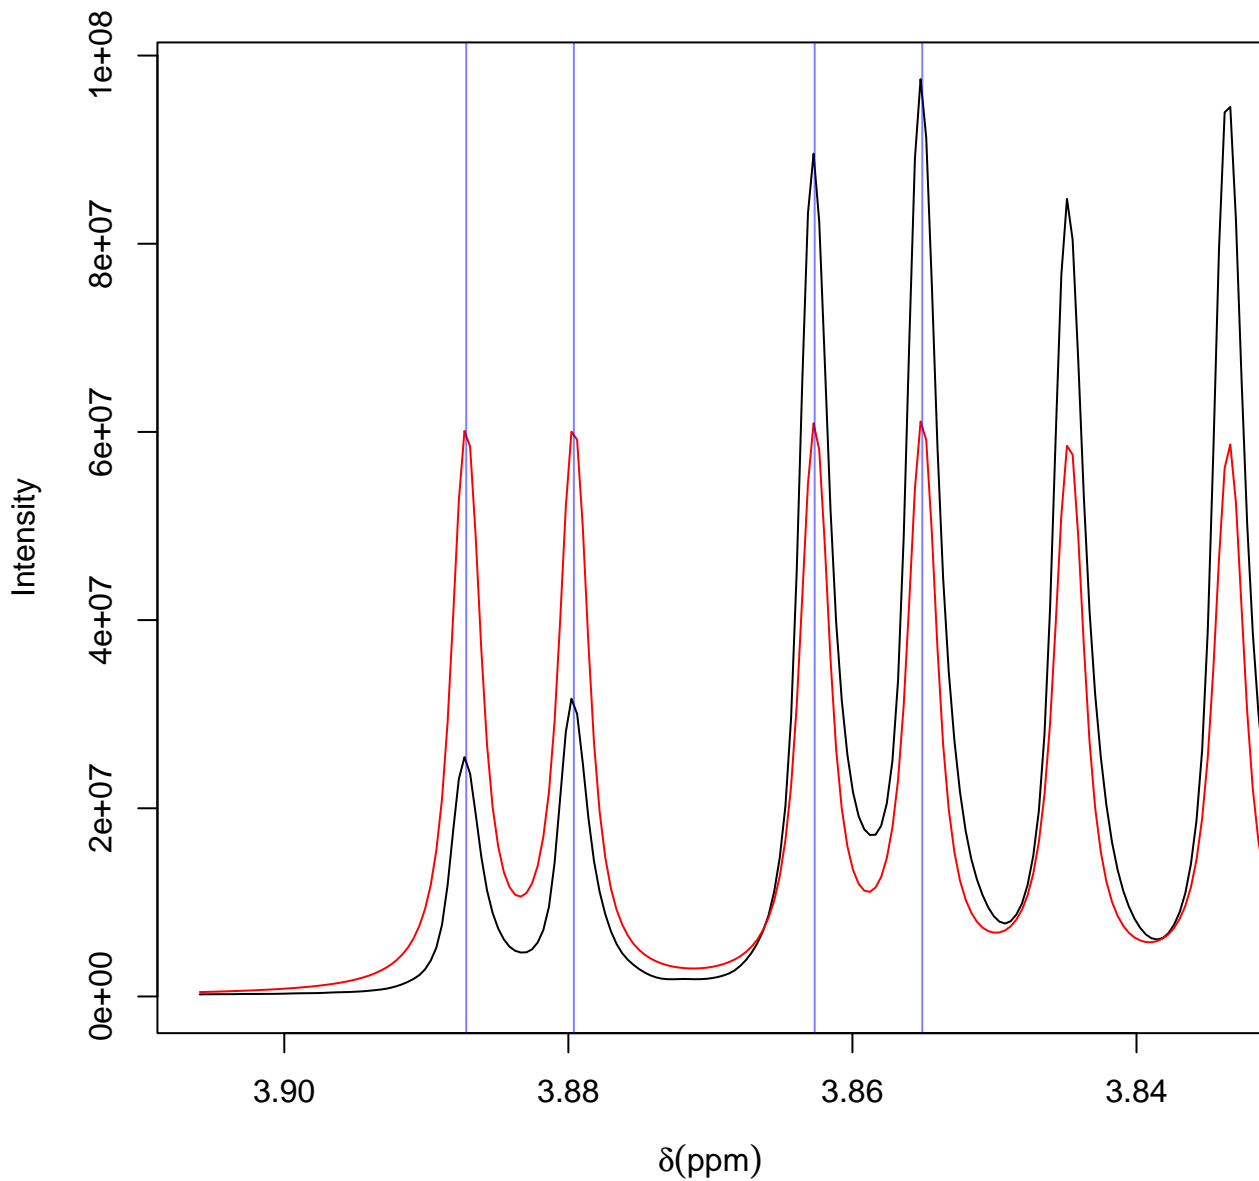

# HB3

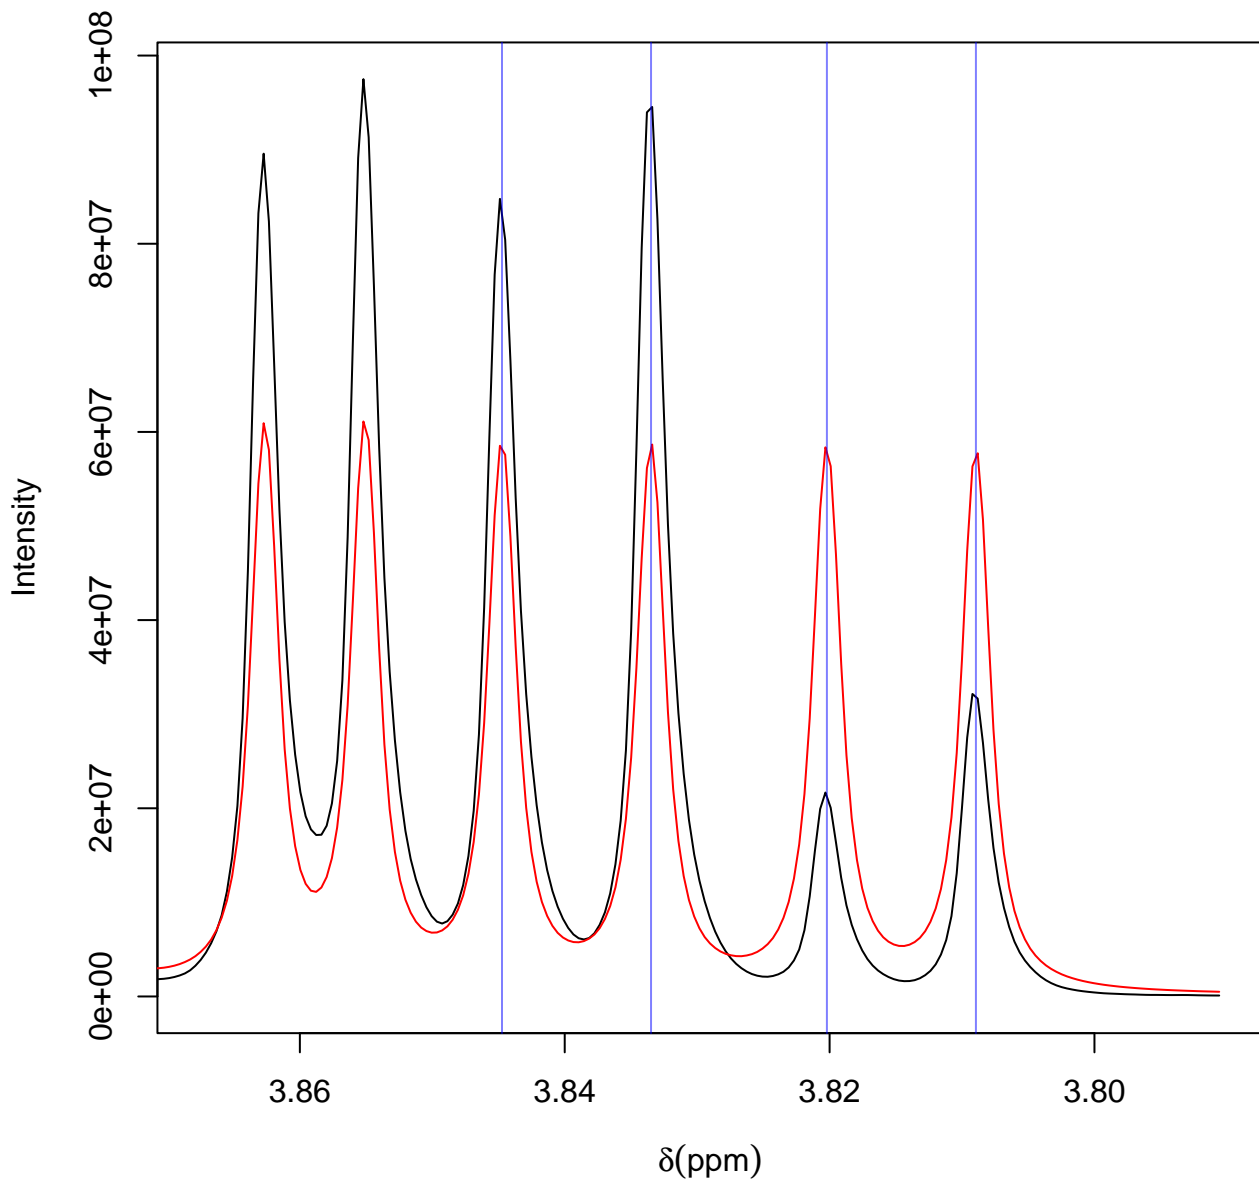

Supplement: Supplementary file 13 [file mr-2024-7-supplement.zip]

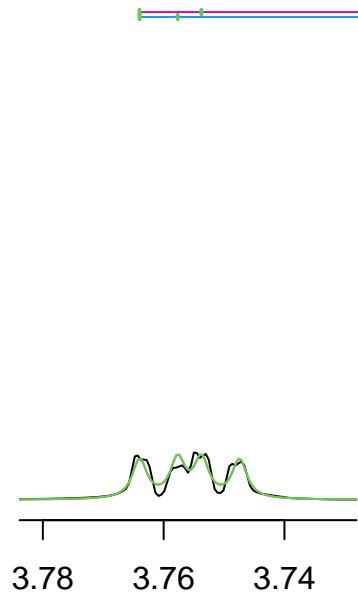

HA

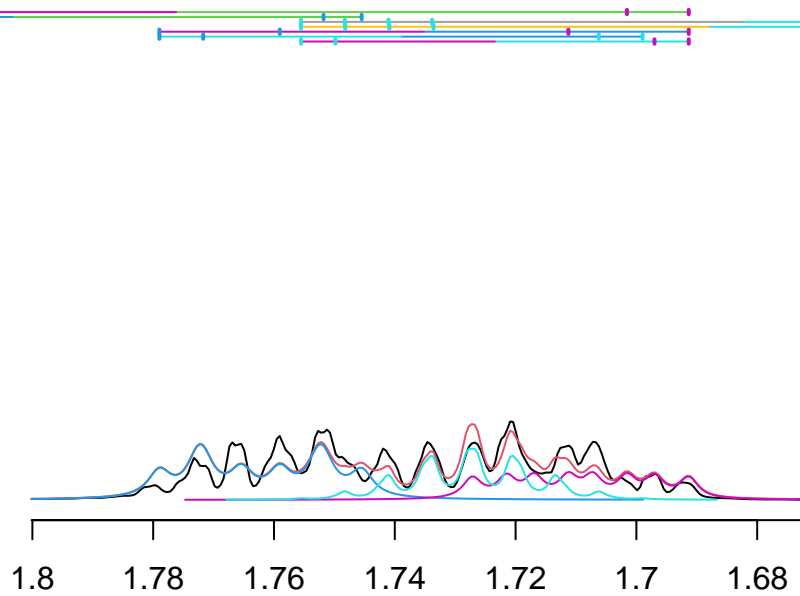

HB2

HG

HB3

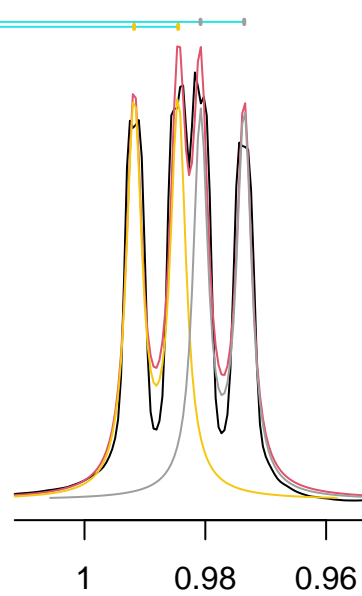

HD1 HD2

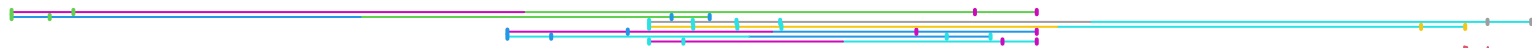

Supplement: Supplementary file 14 [file mr-2024-7-supplement.zip]

HA

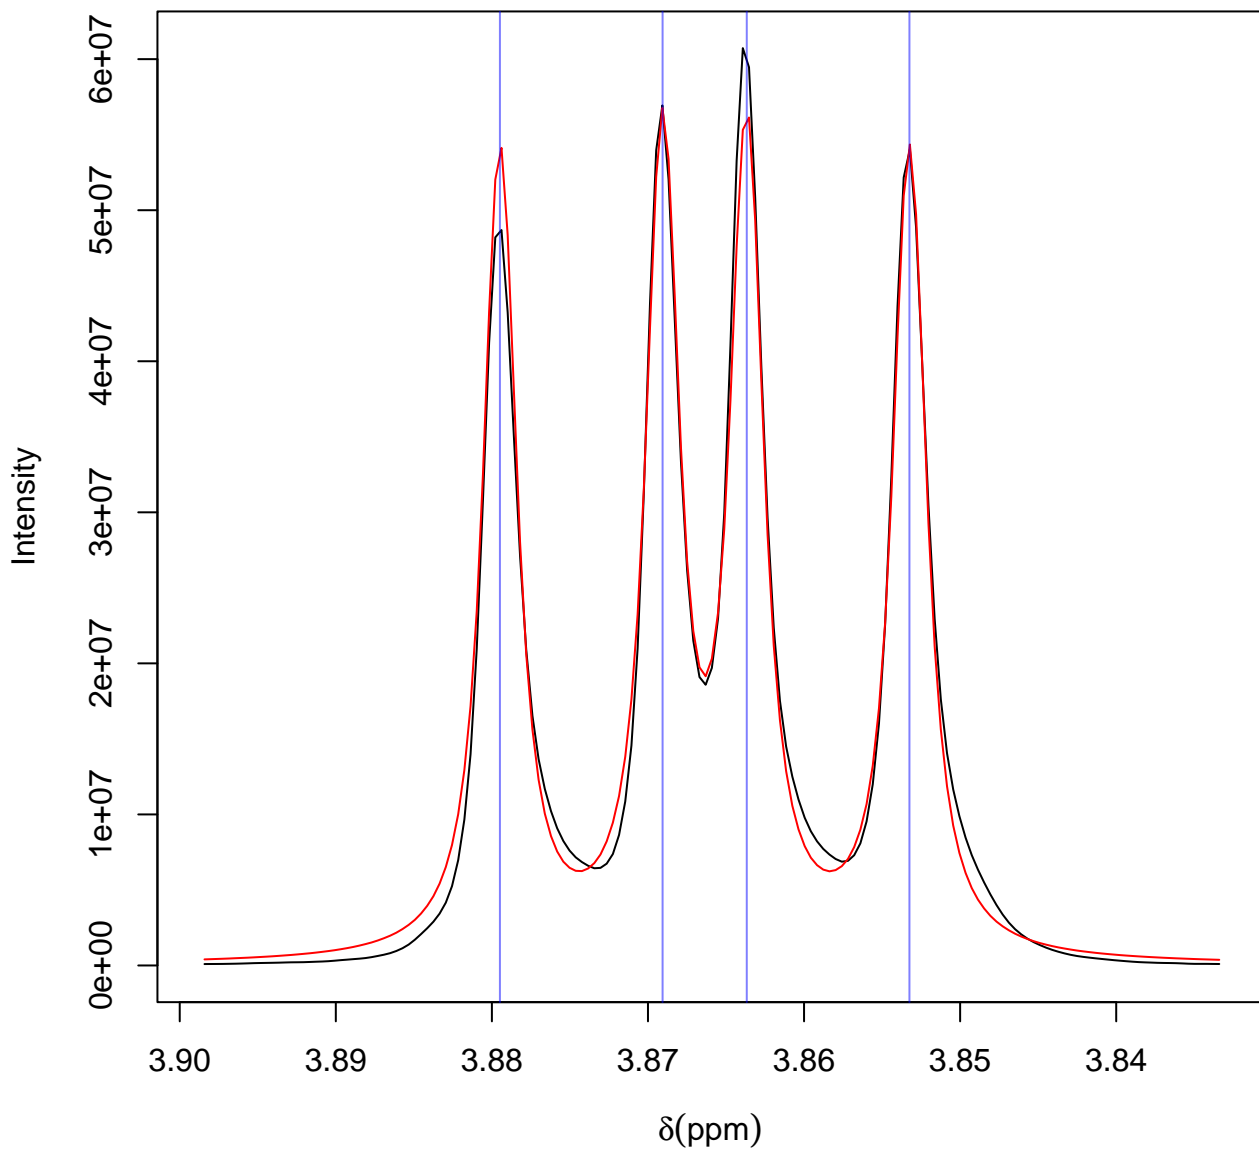

# HB2

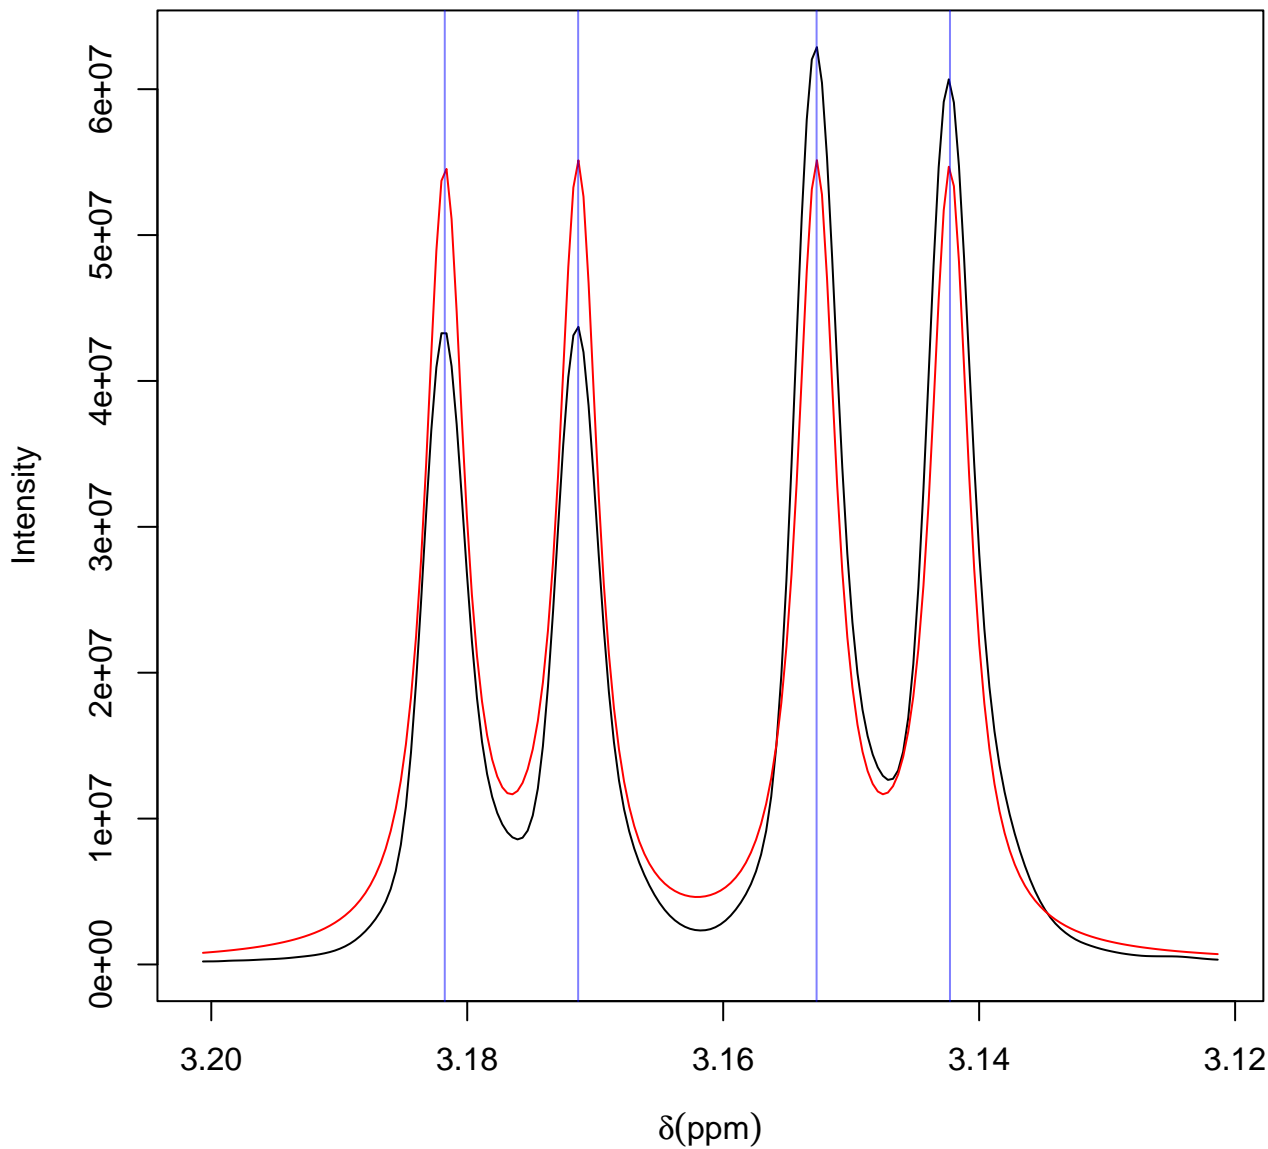

# HB3

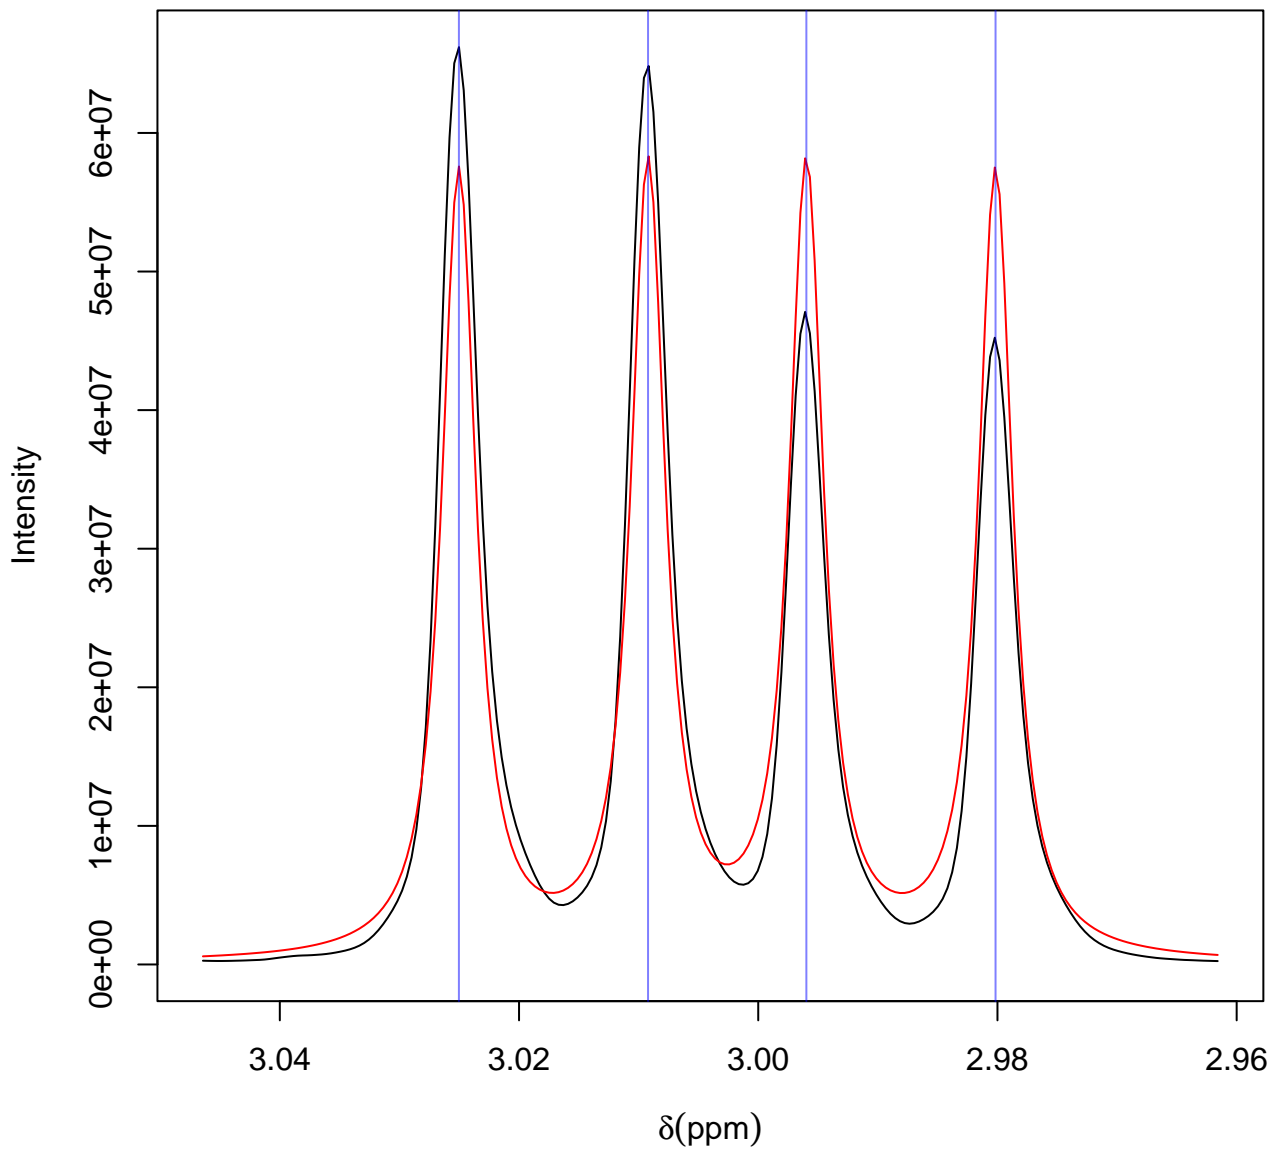

# HD1/2

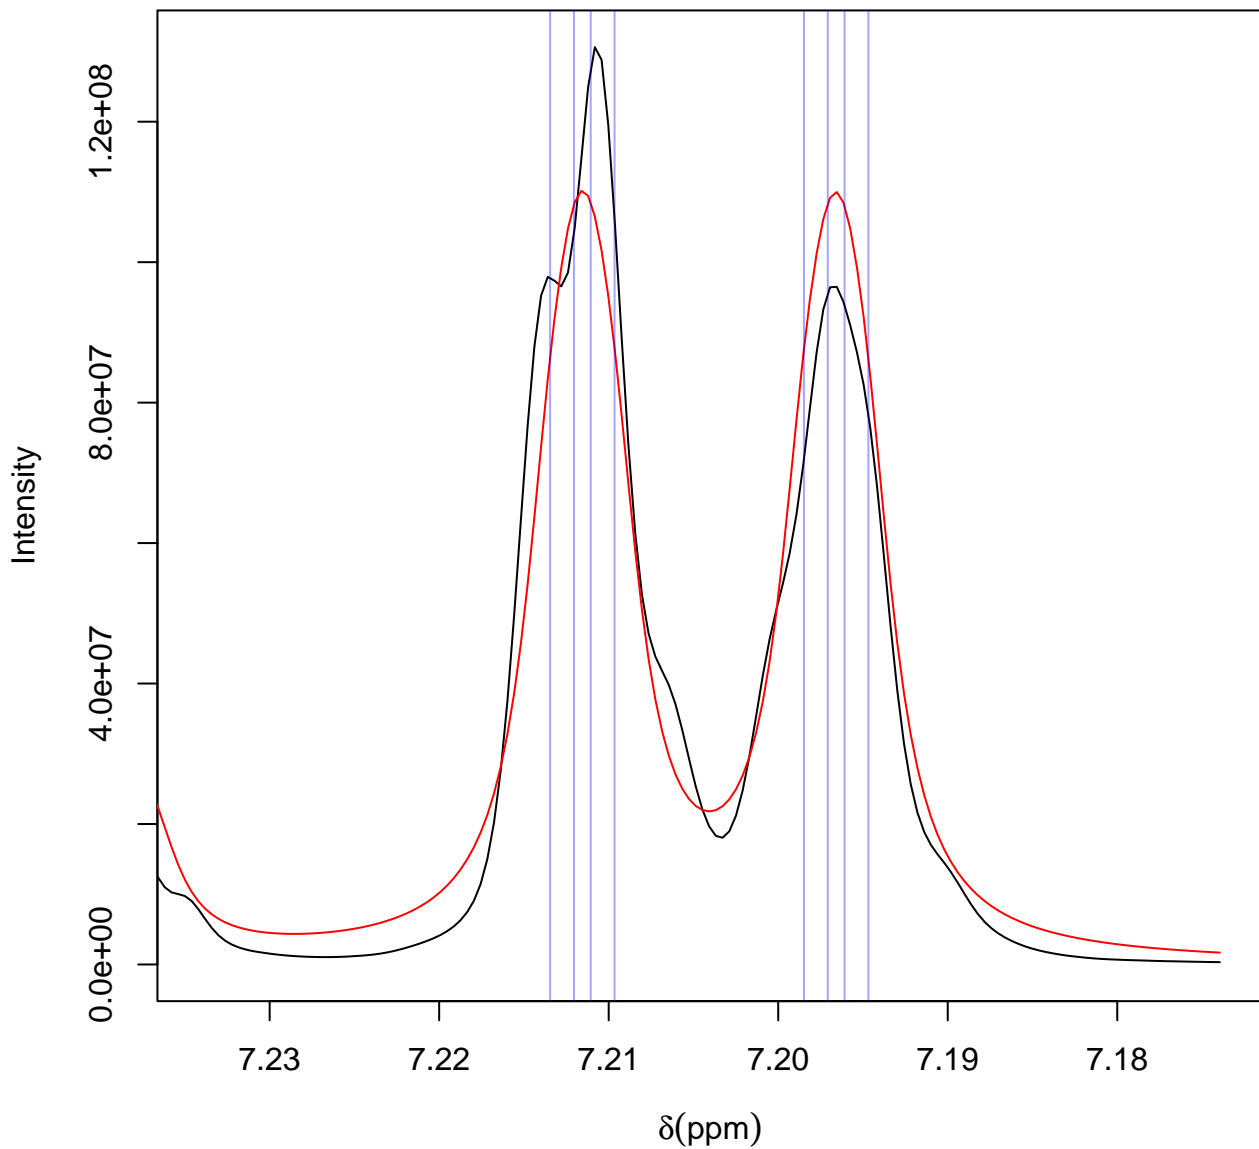

# HE1/2

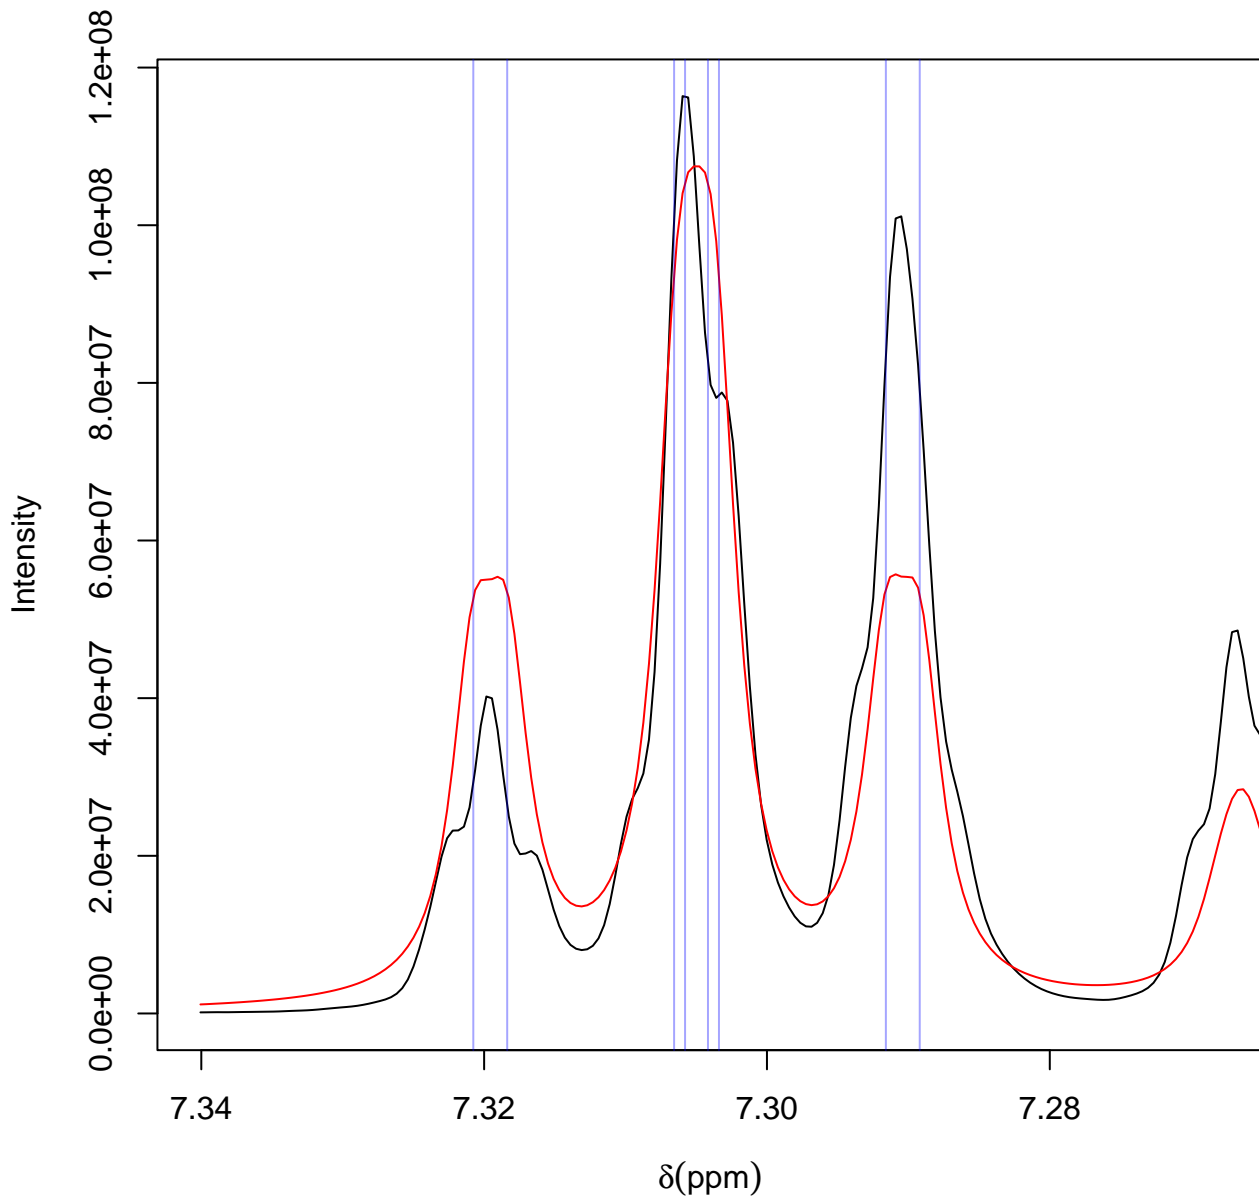

HZ

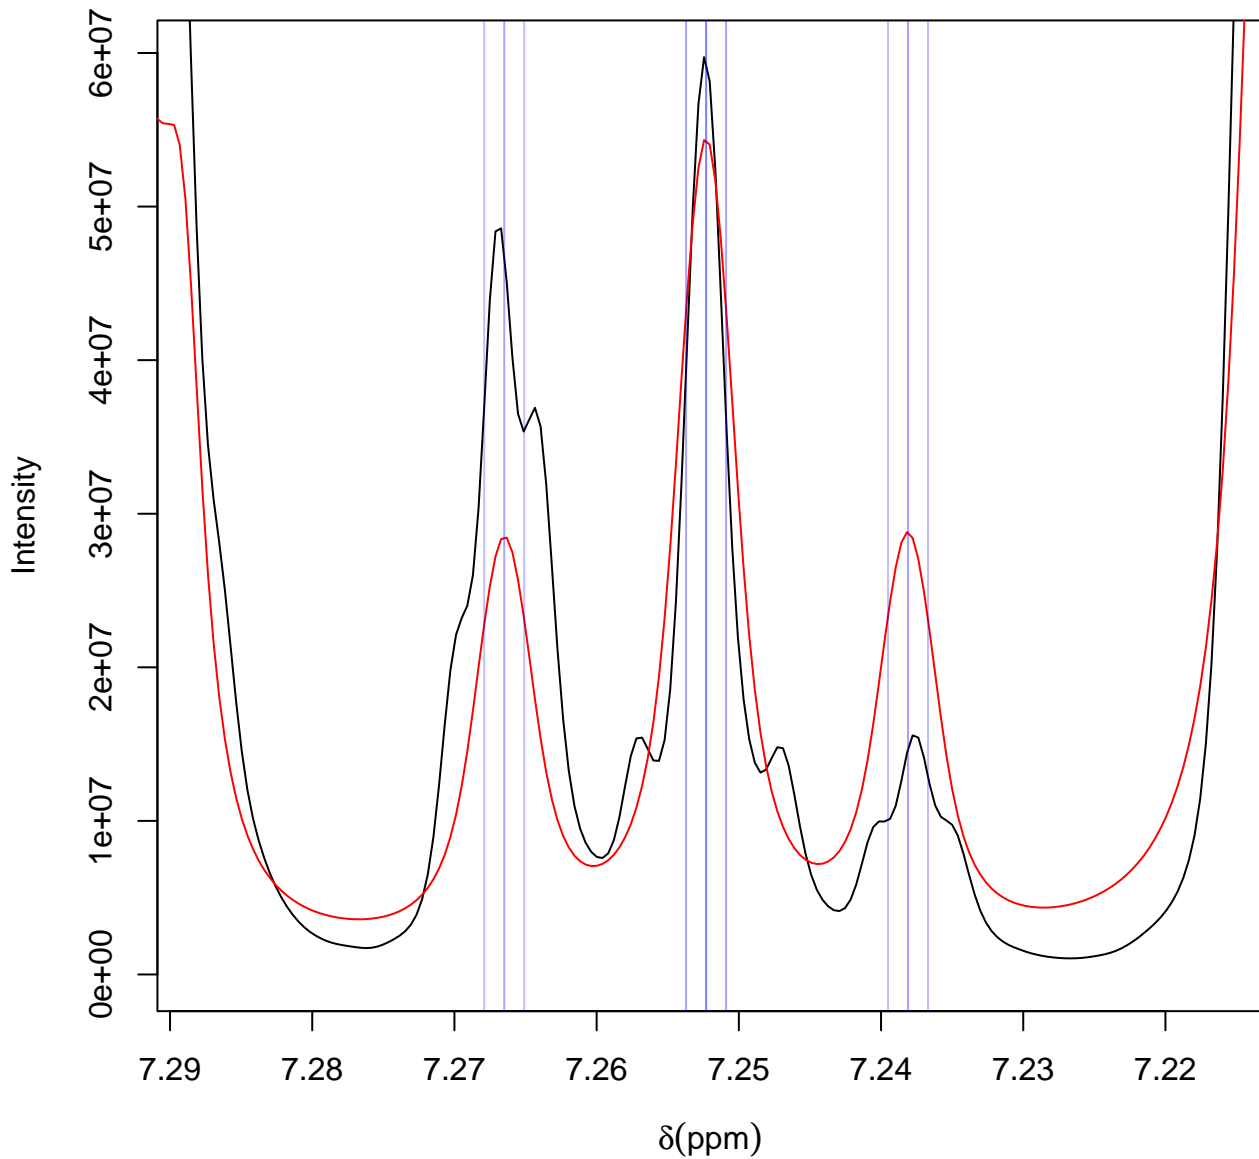

Supplement: Supplementary file 15 [file mr-2024-7-supplement.zip]

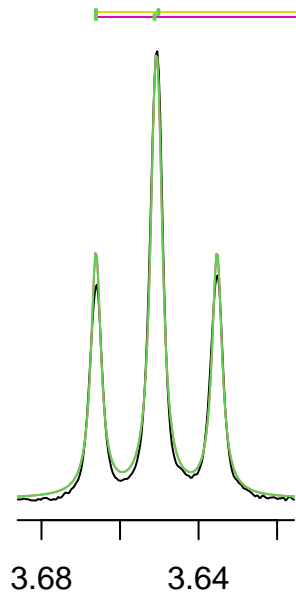

HA

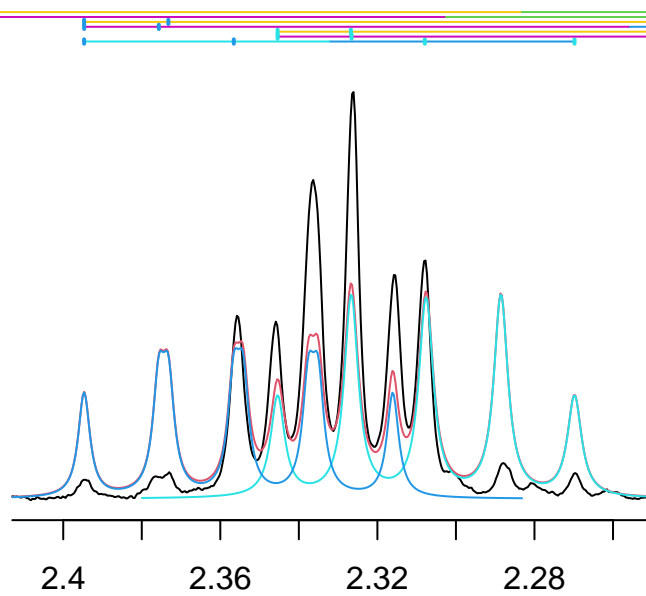

HG2

HG3

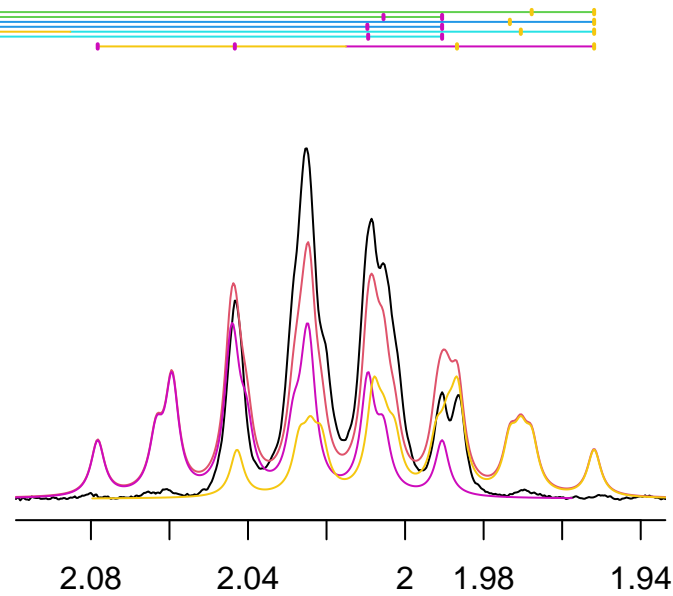

HB2

HB3

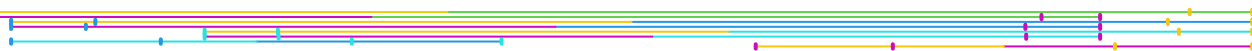

Supplement: Supplementary file 16 [file mr-2024-7-supplement.zip]

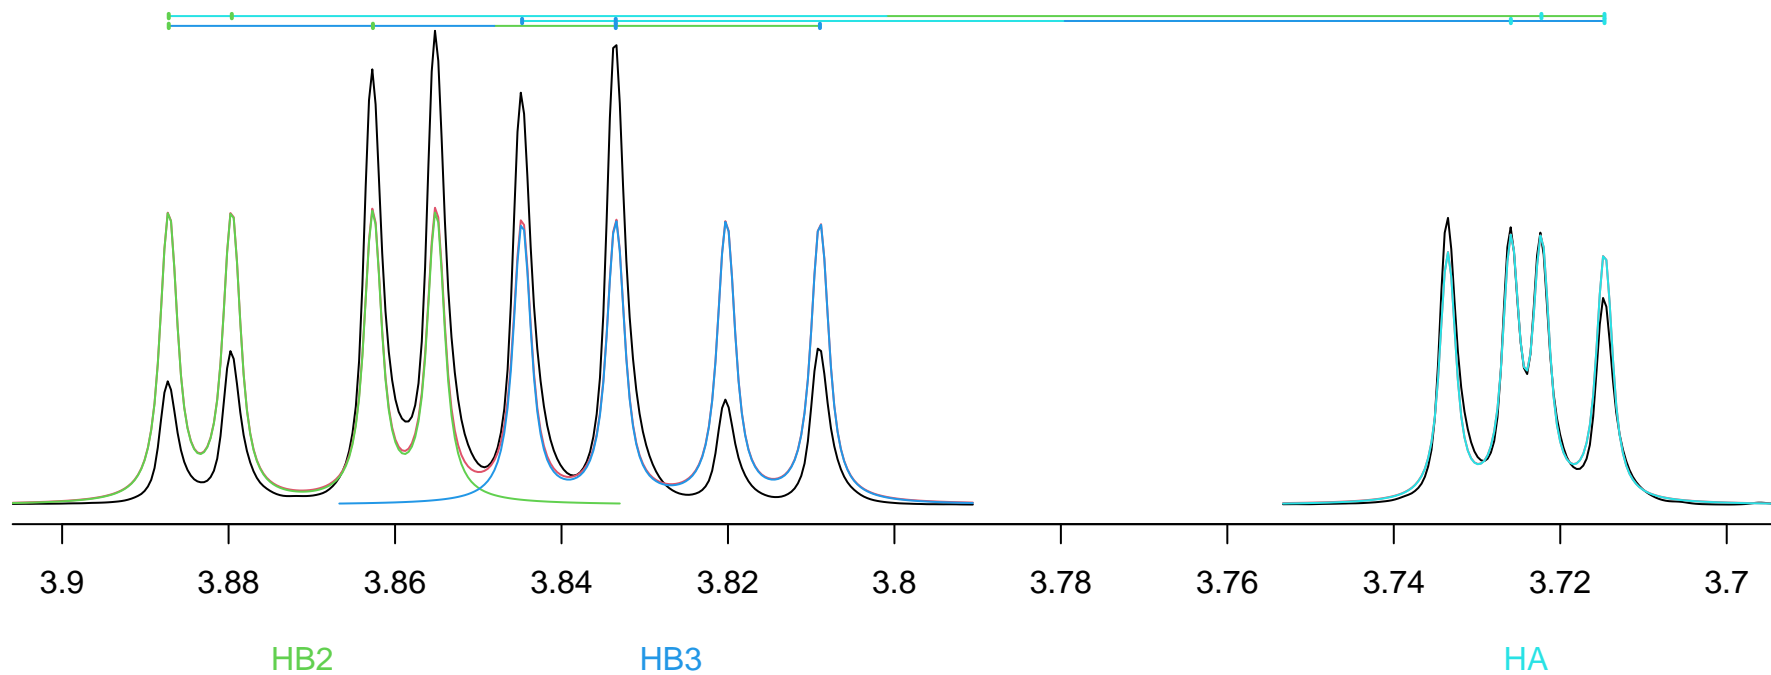

Supplement: Supplementary file 17 [file mr-2024-7-supplement.zip]

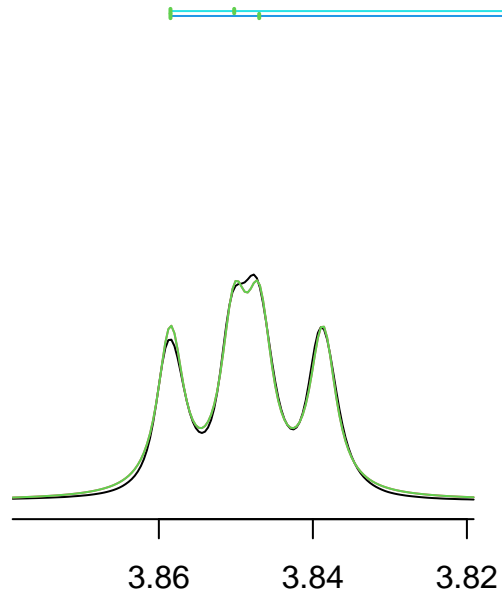

HA

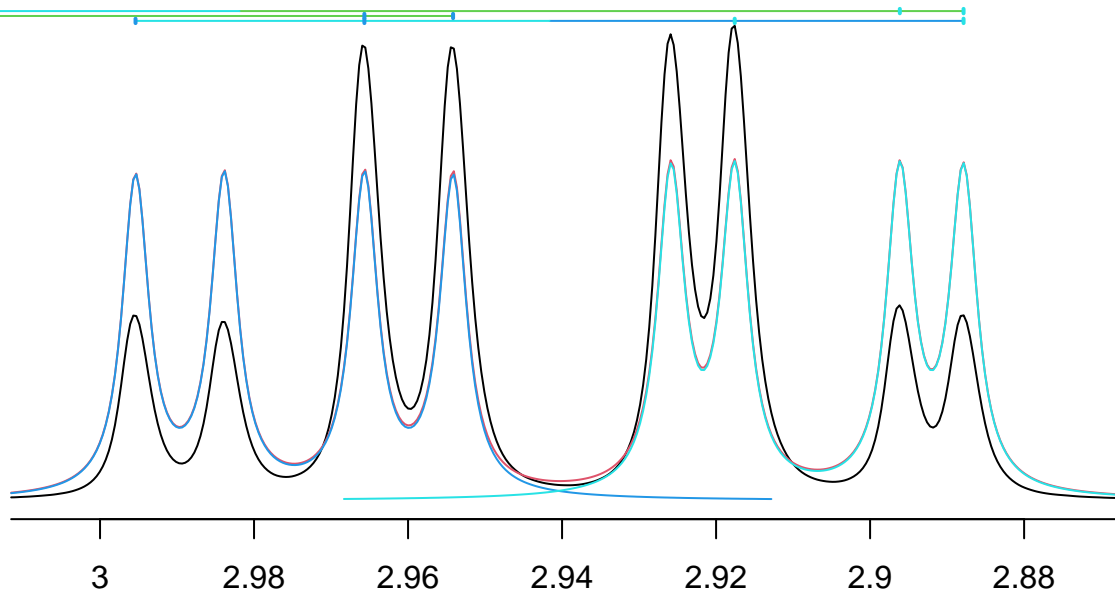

HB2

HB3

Supplement: Supplementary file 18 [file mr-2024-7-supplement.zip]

HA

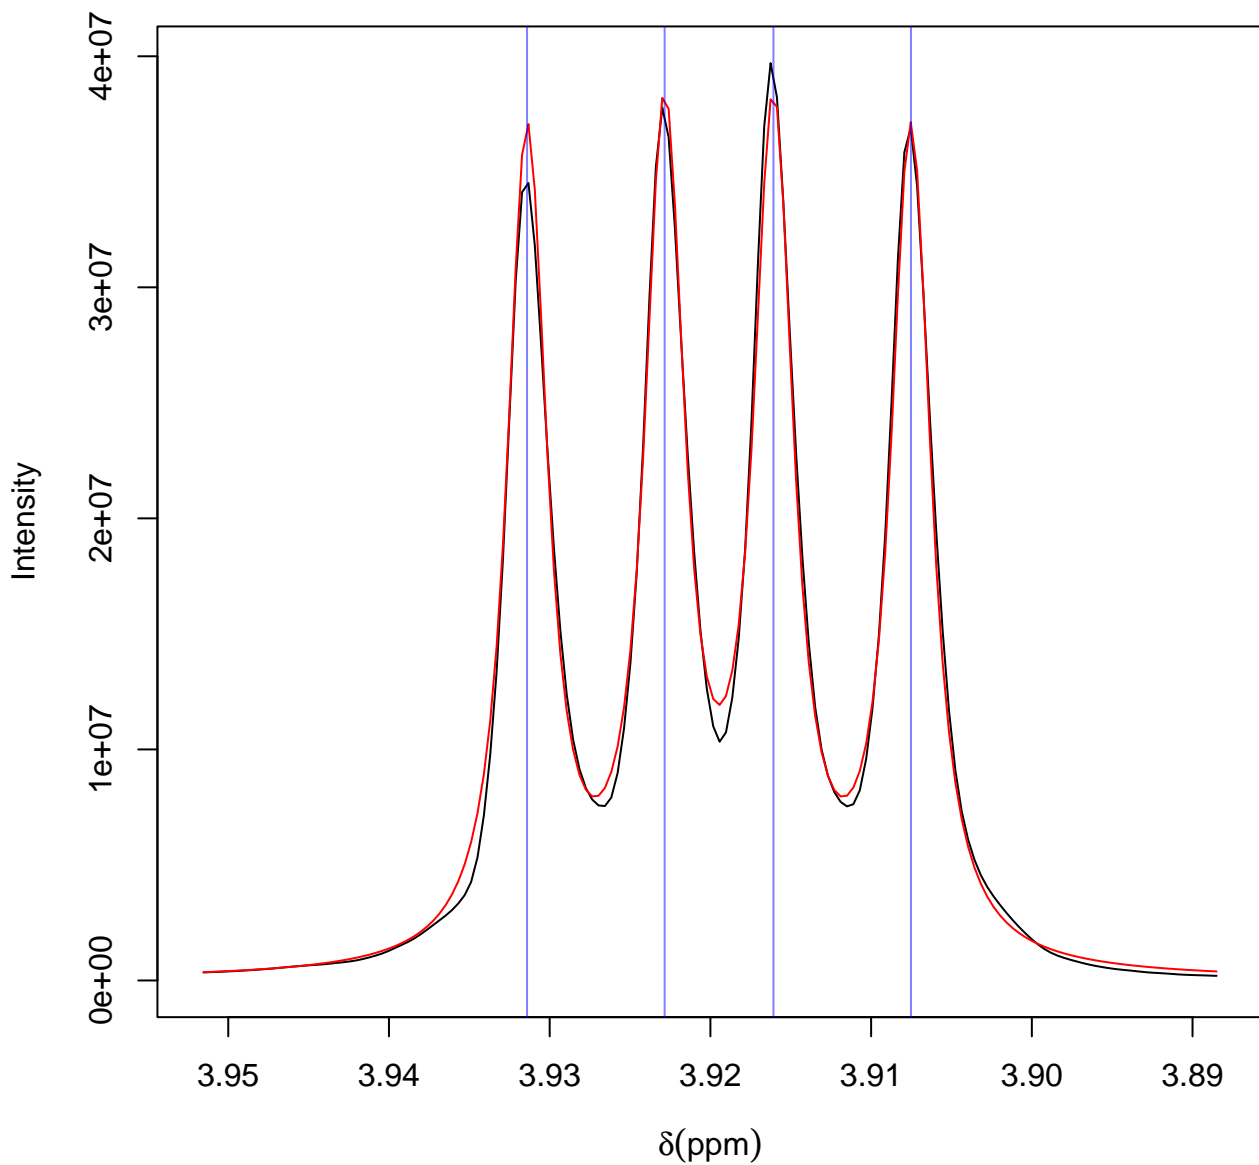

# HB3

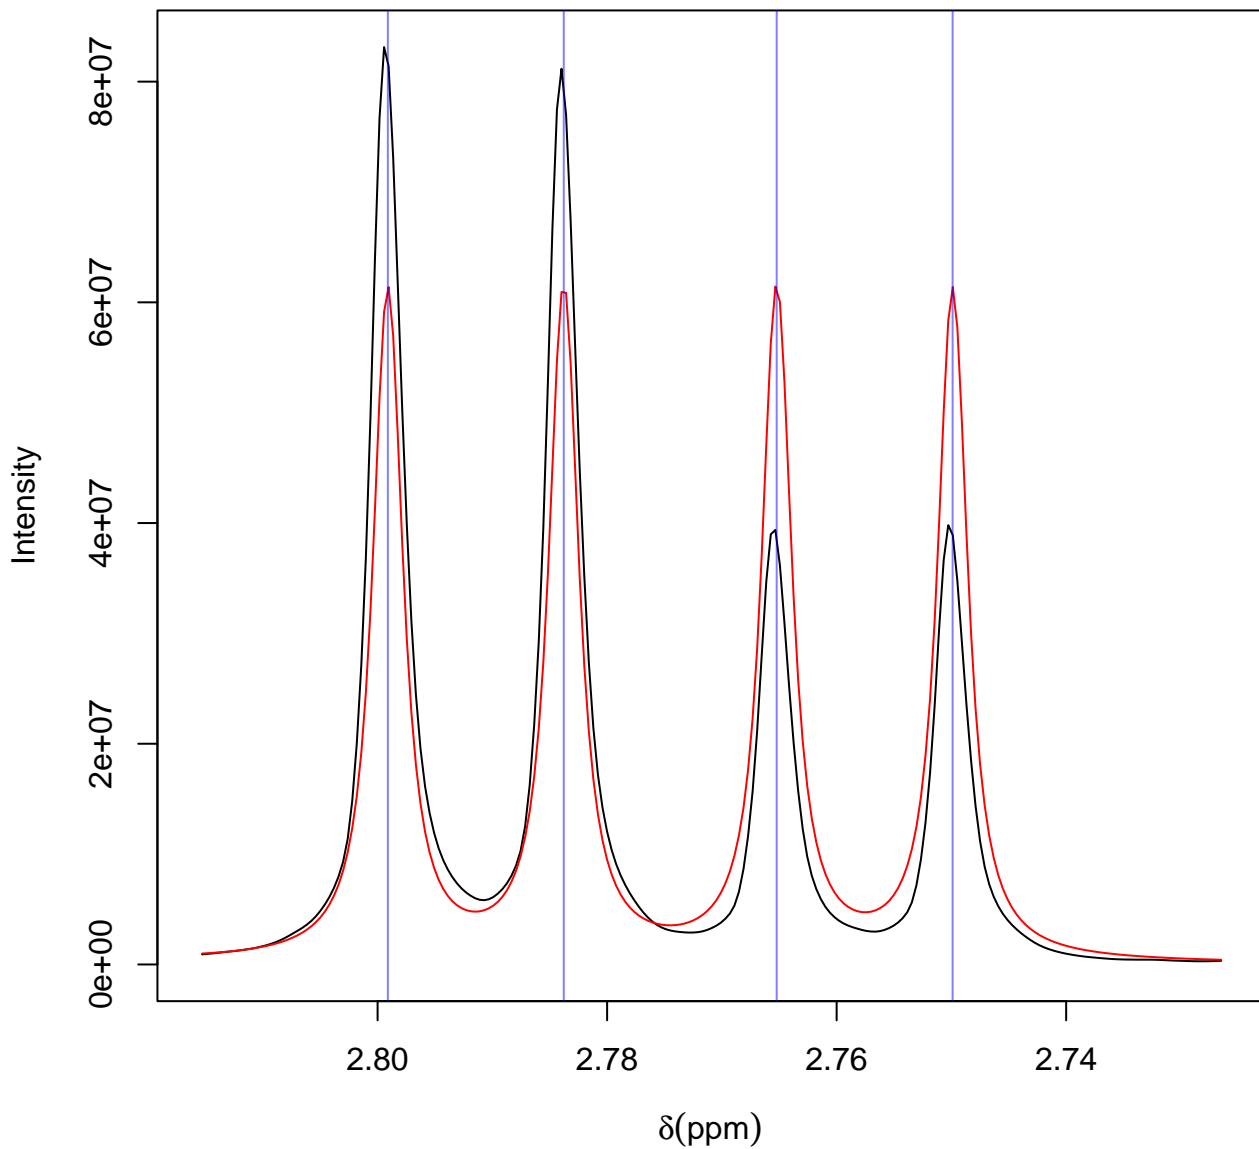

# HB2

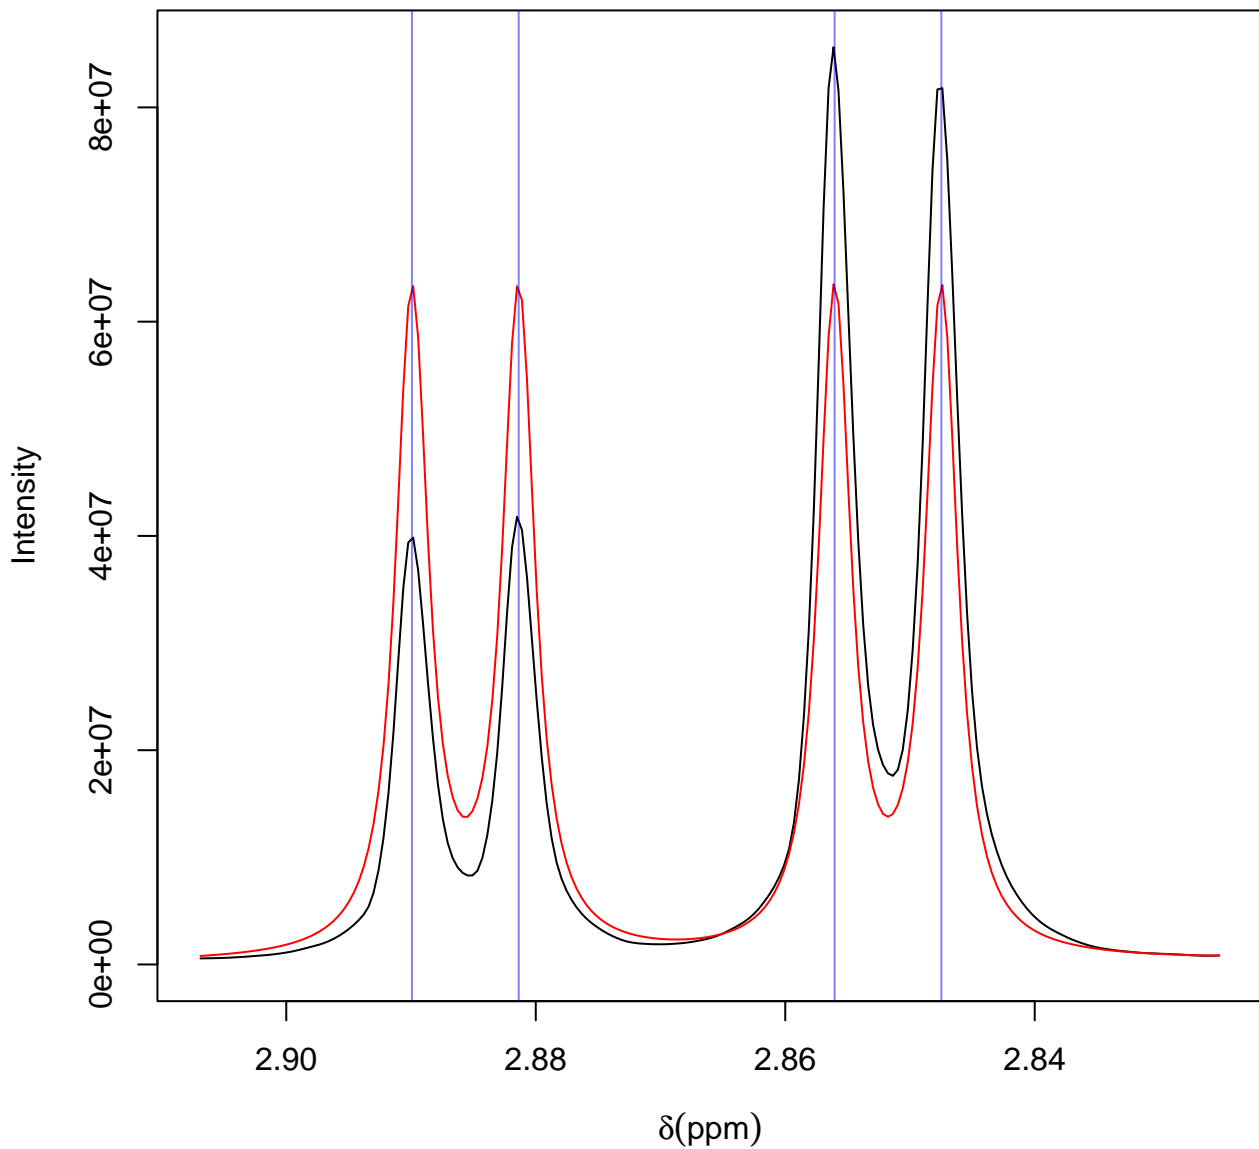

Supplement: Supplementary file 19 [file mr-2024-7-supplement.zip]

HA

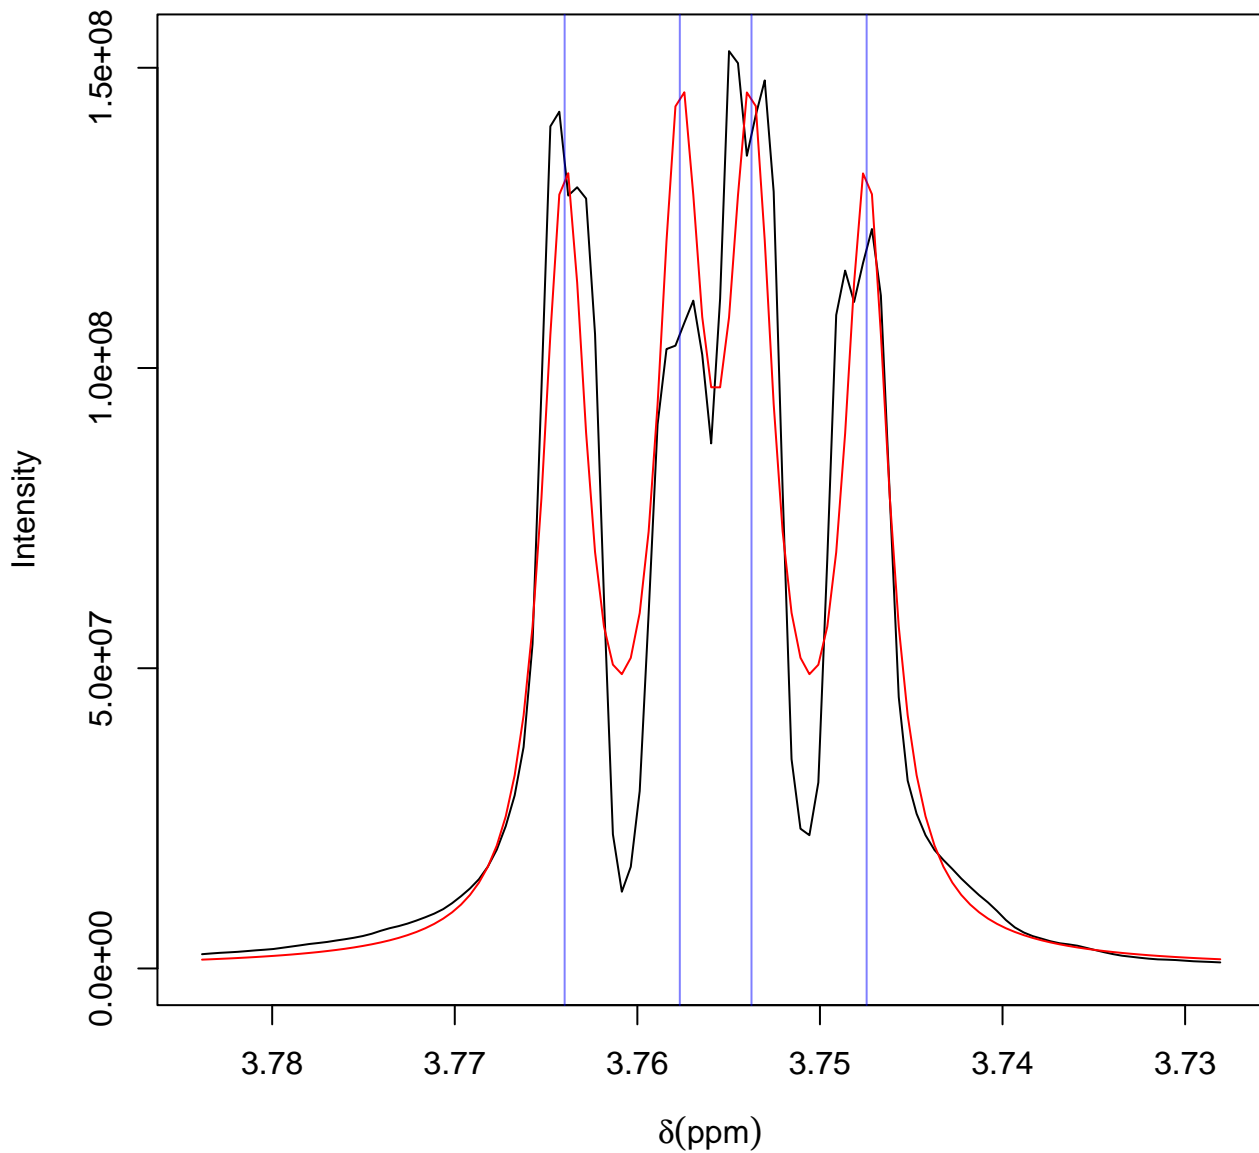

# HB2

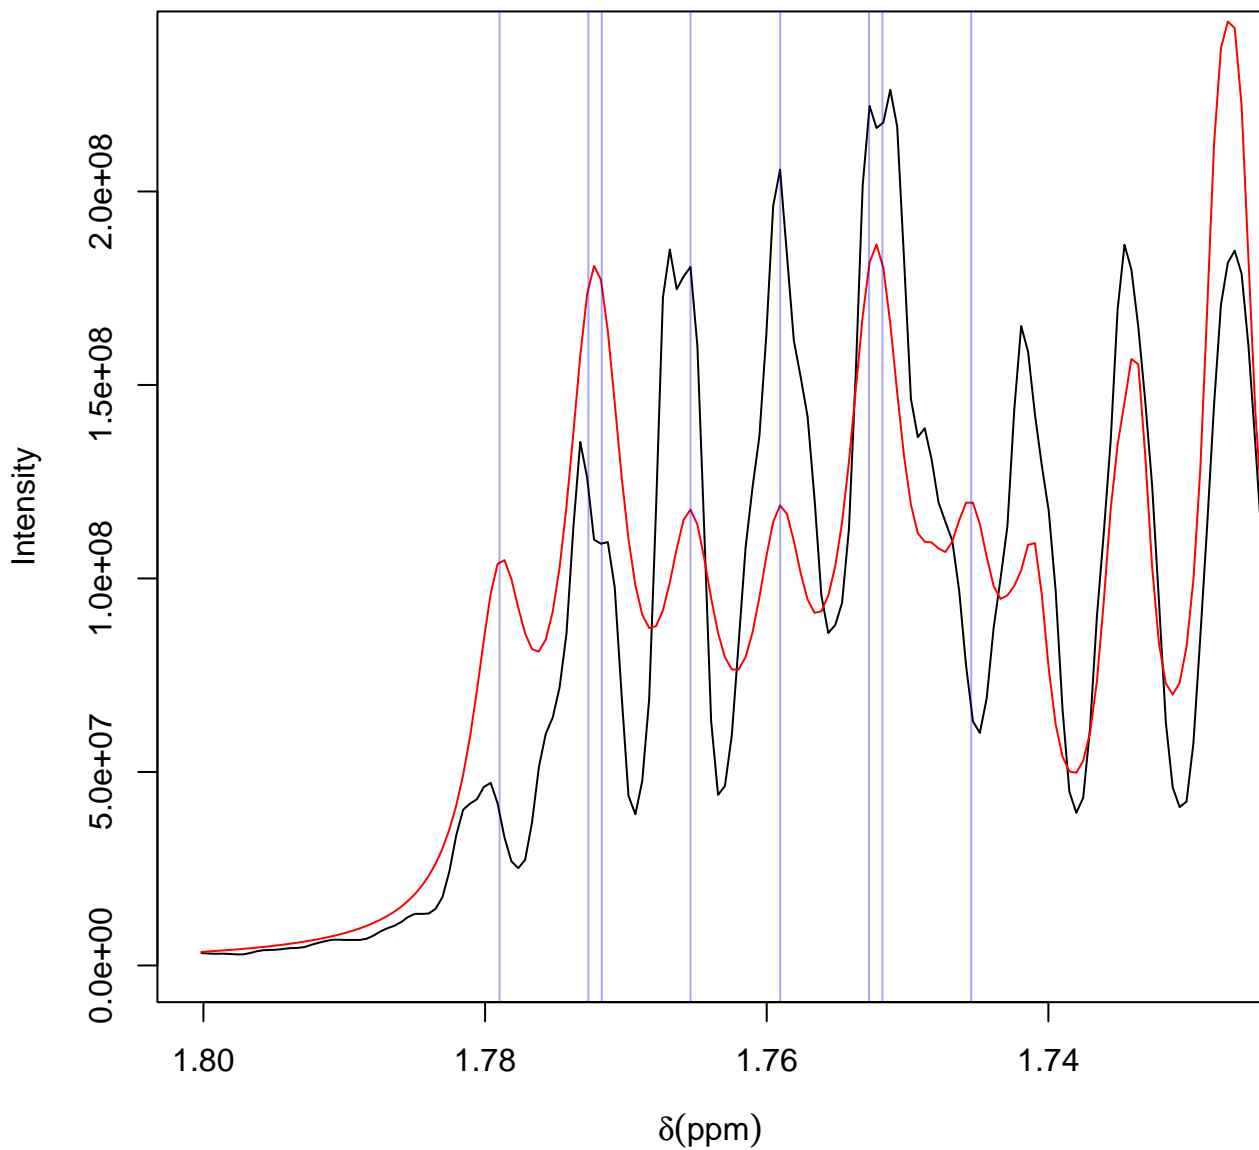

# HB3

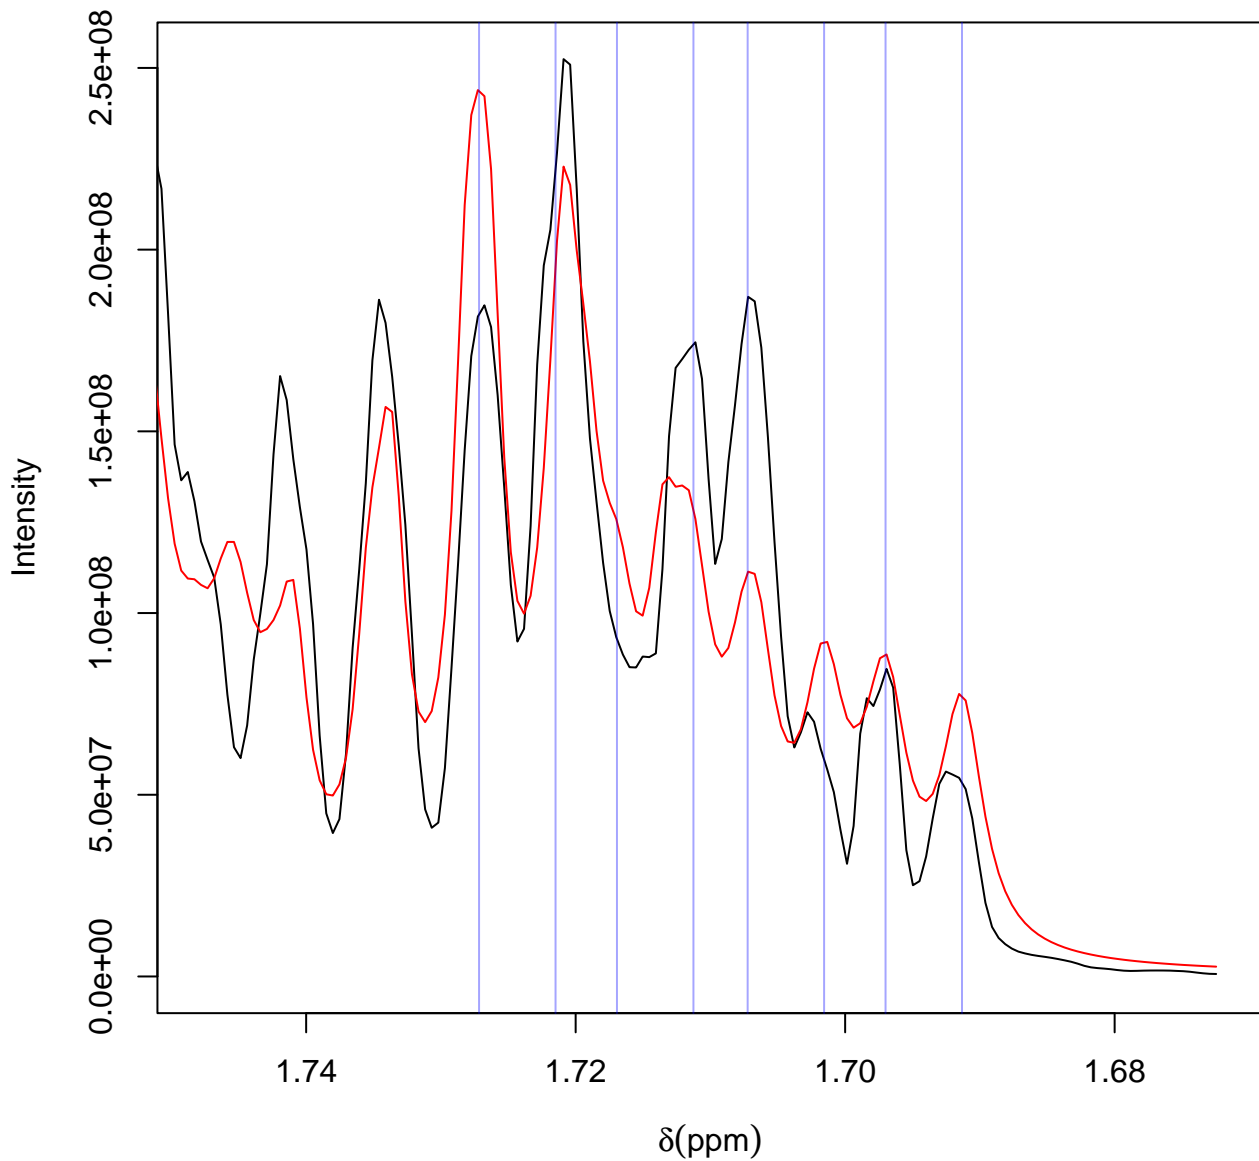

**HG**

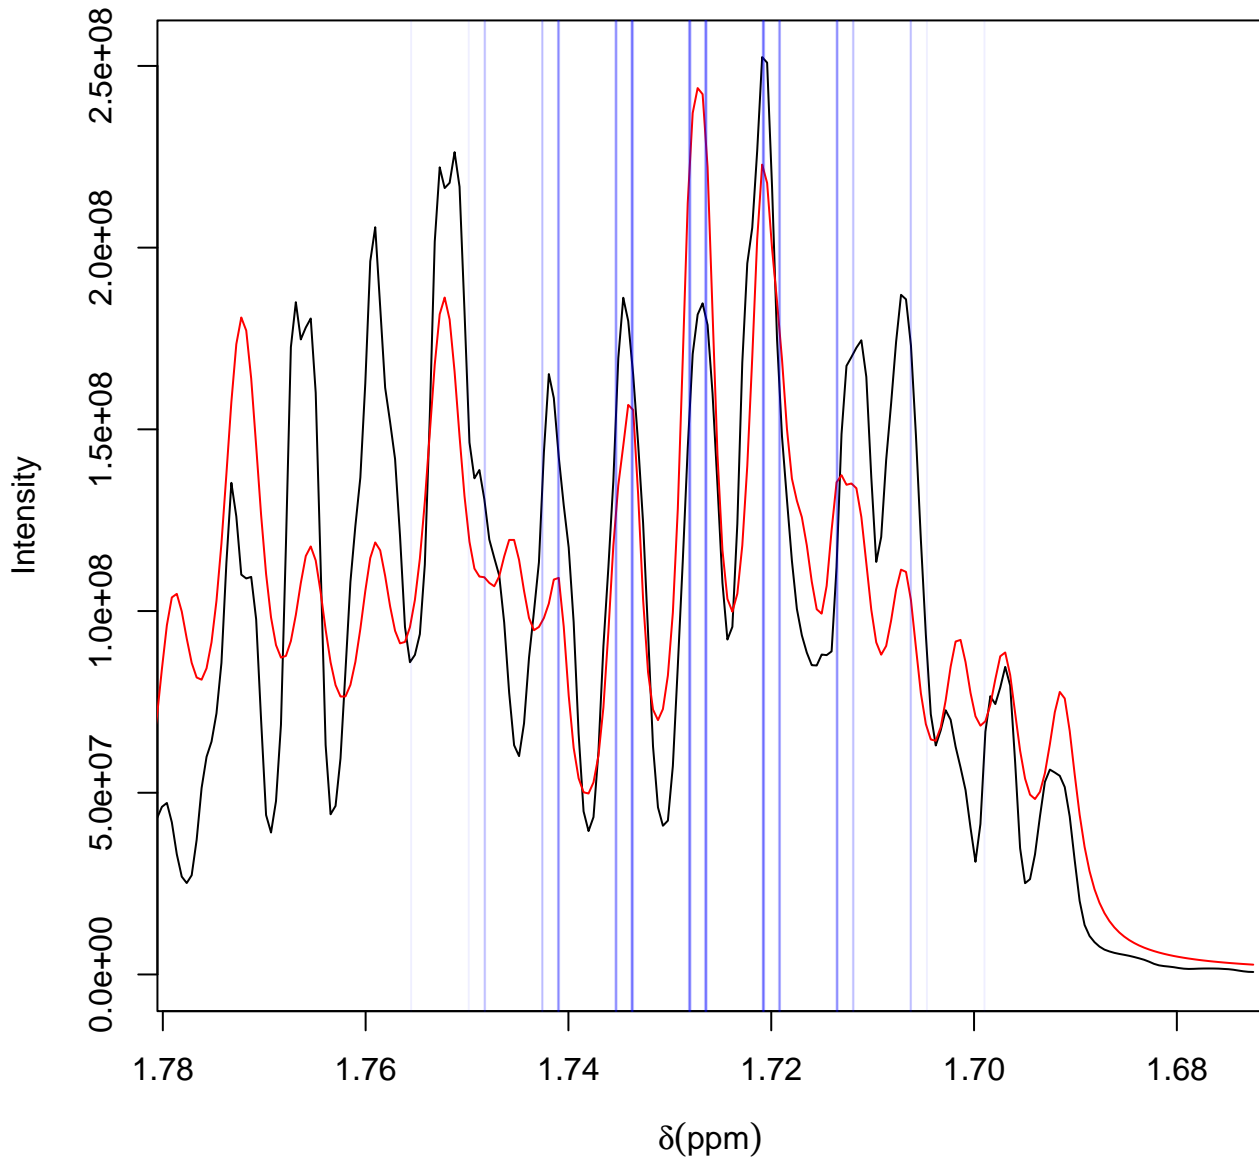

# HD1

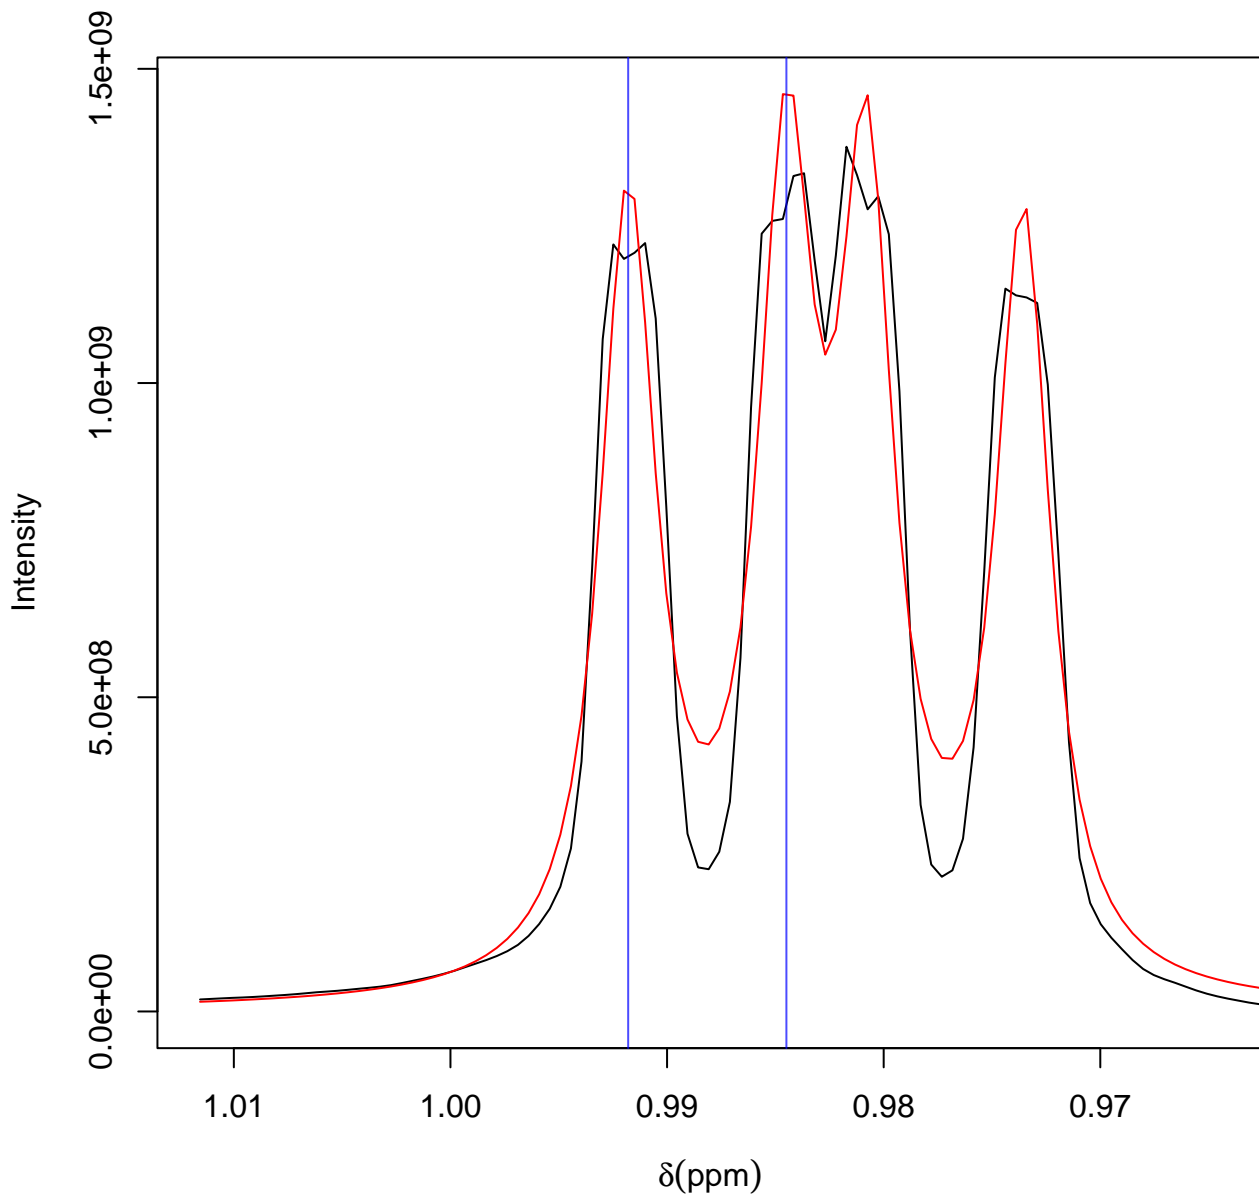

# HD2

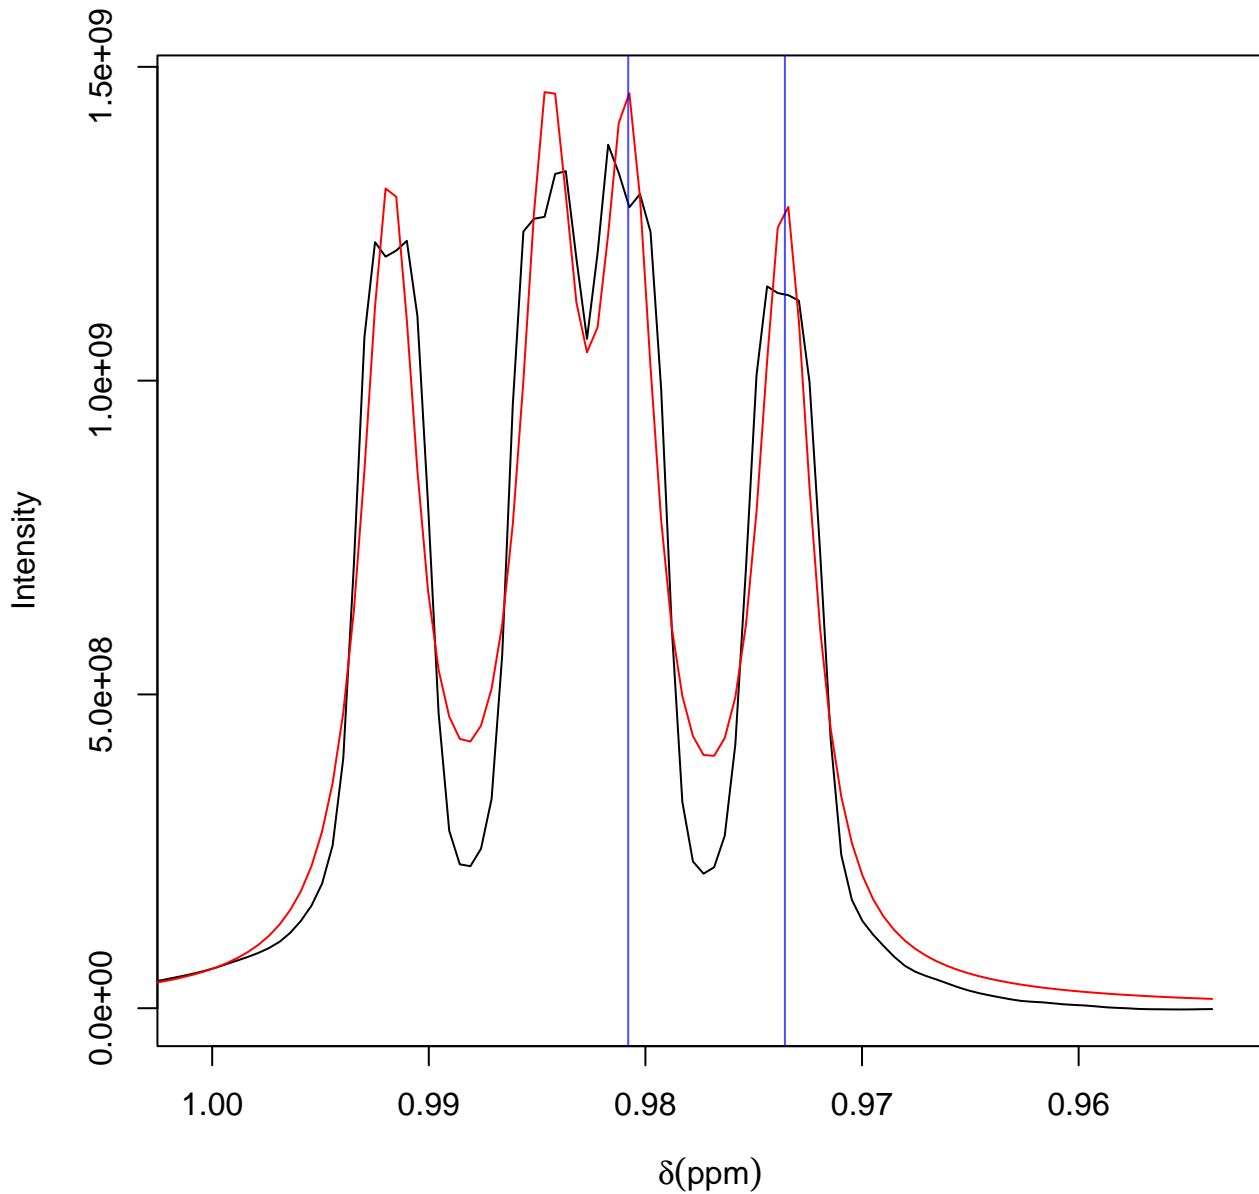

Supplement: Supplementary file 20 [file mr-2024-7-supplement.zip]

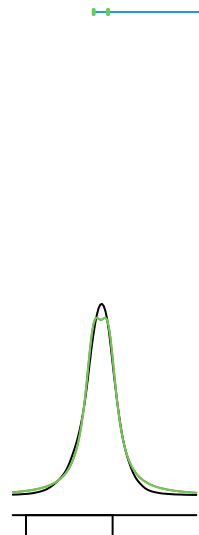

7.76

HE1

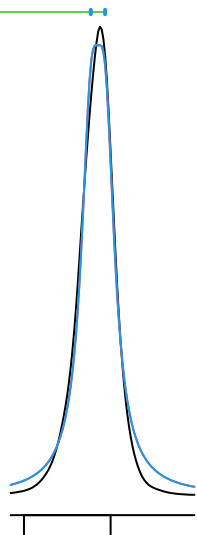

7 6.98

HD2

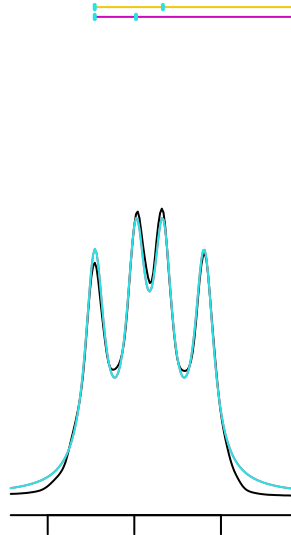

3.92 3.9 3.88

HA

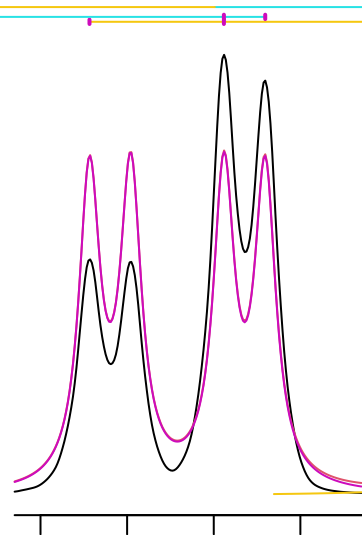

3.18 3.14 3.1 3.08

HB2

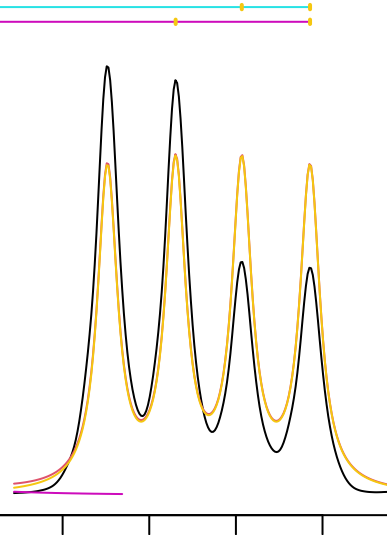

3.08 3.04

HB3

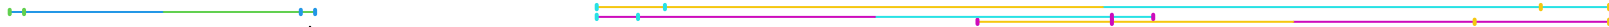

Supplement: Supplementary file 22 [file mr-2024-7-supplement.zip]

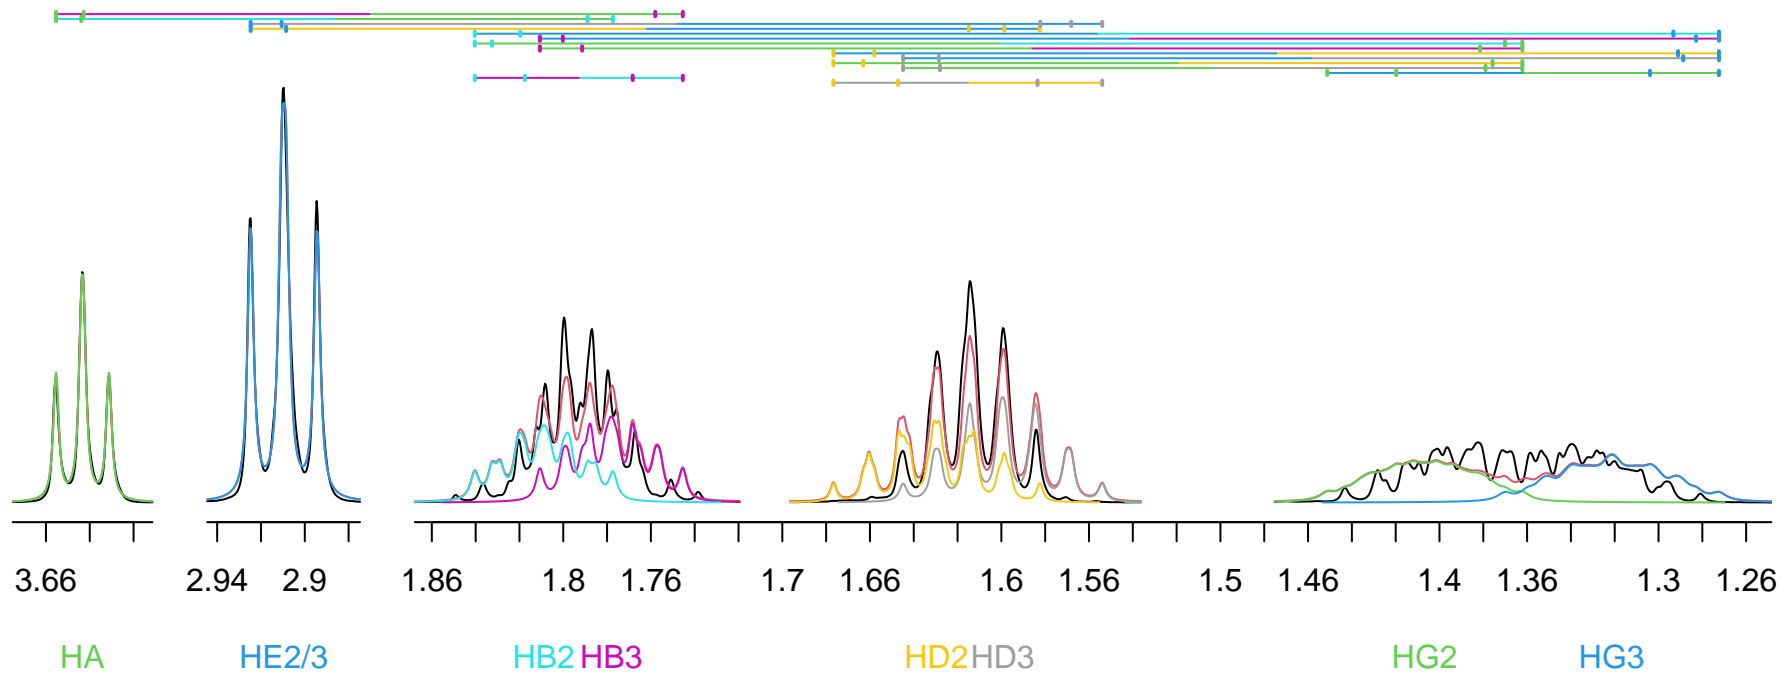

Supplement: Supplementary file 23 [file mr-2024-7-supplement.zip]

HA

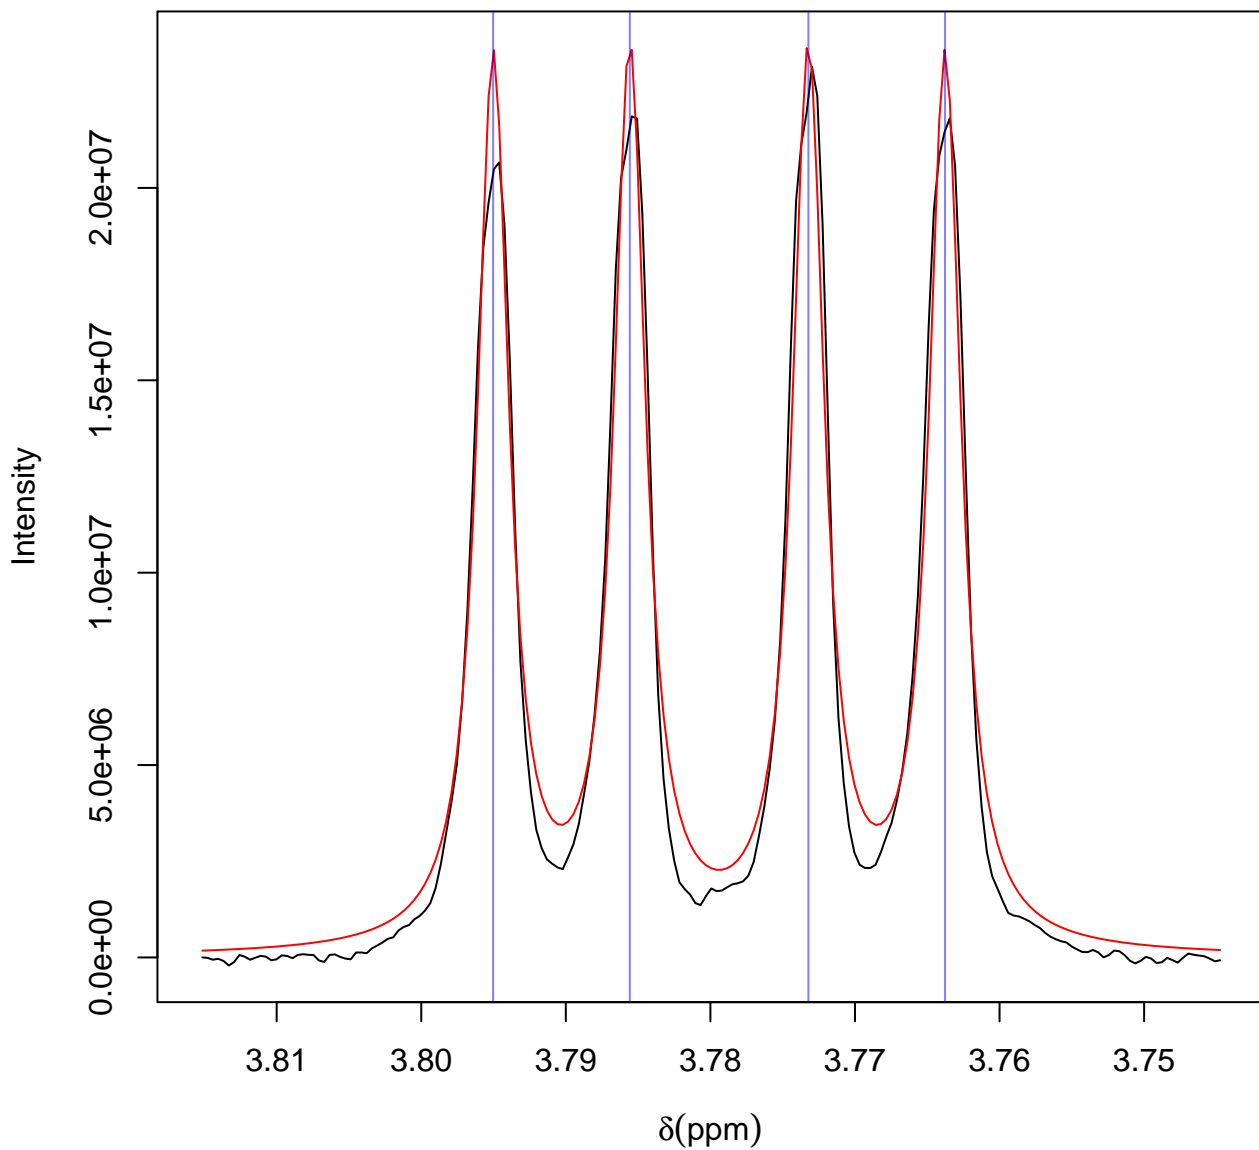

# HB2

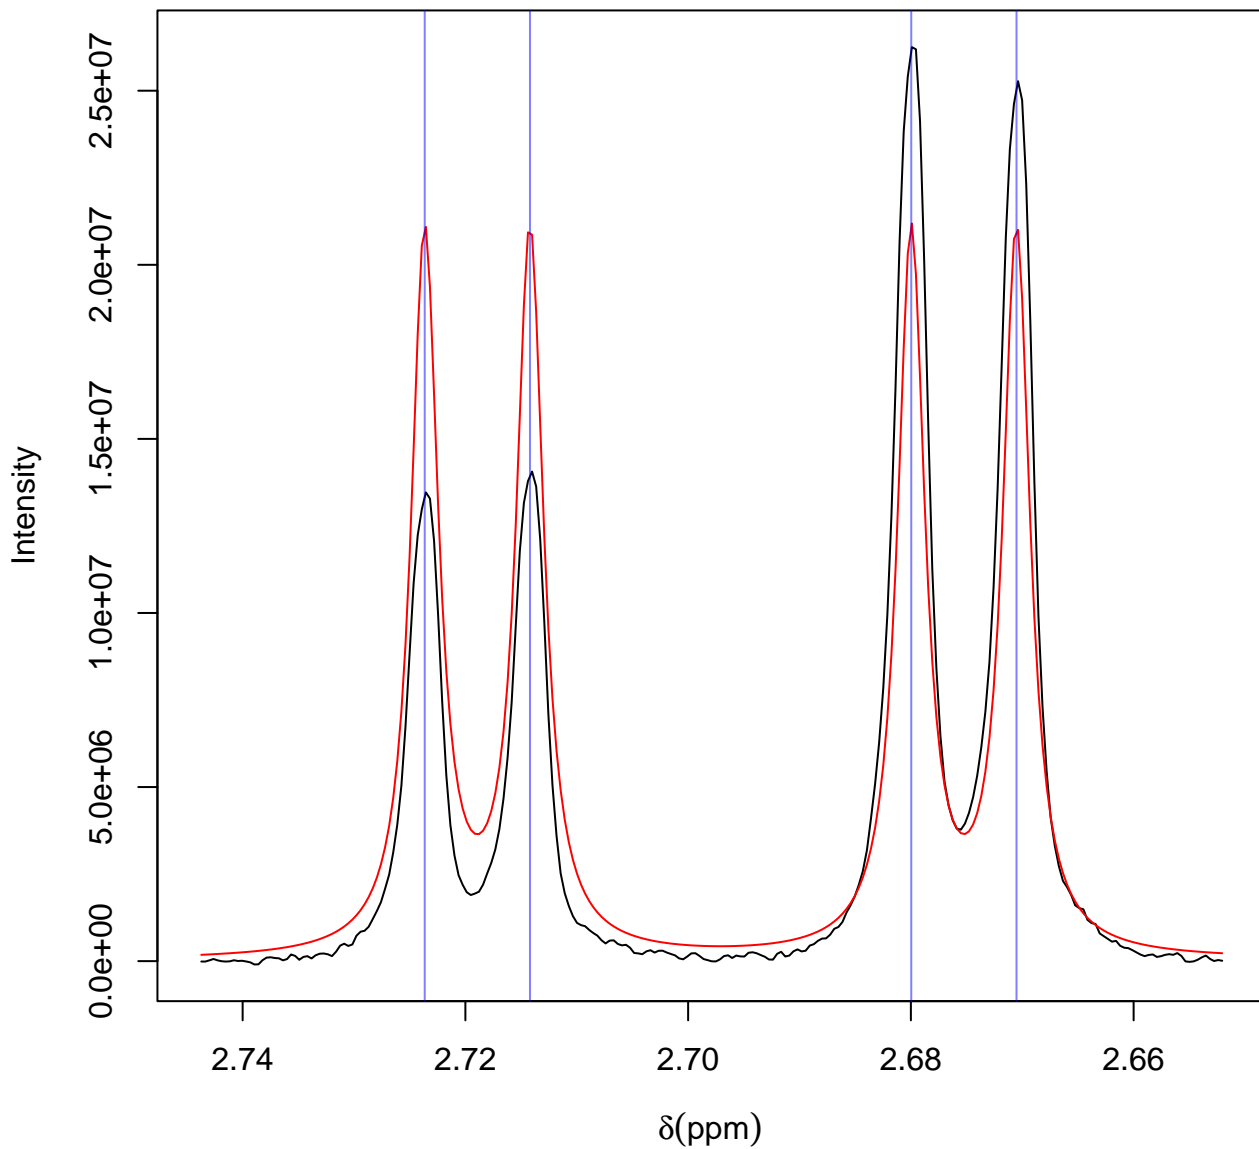

# HB3

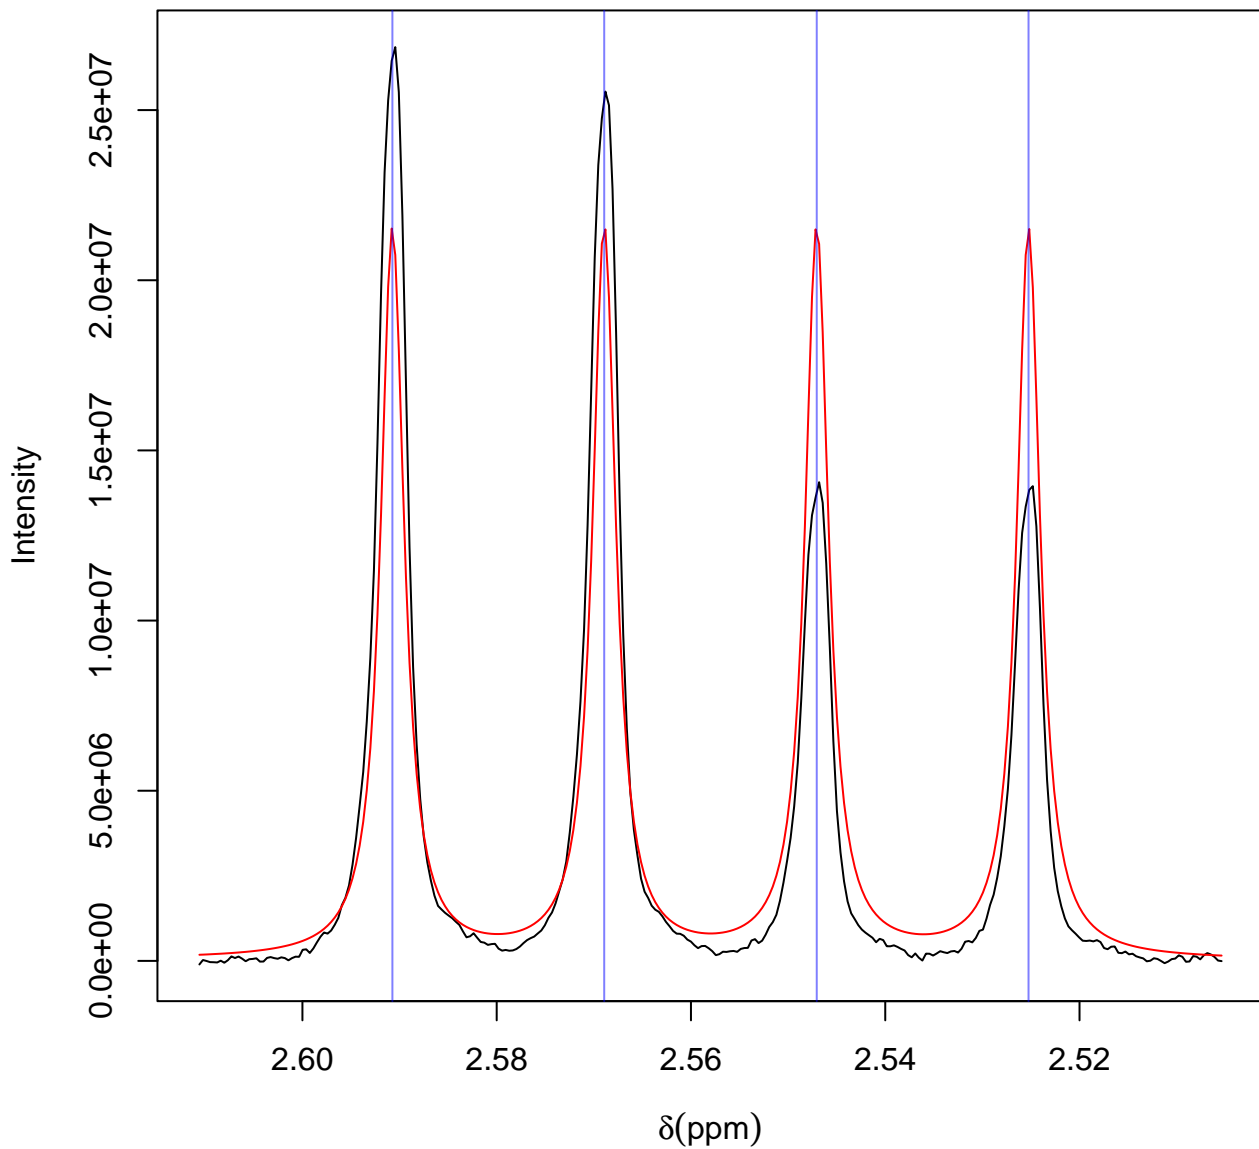

Supplement: Supplementary file 24 [file mr-2024-7-supplement.zip]

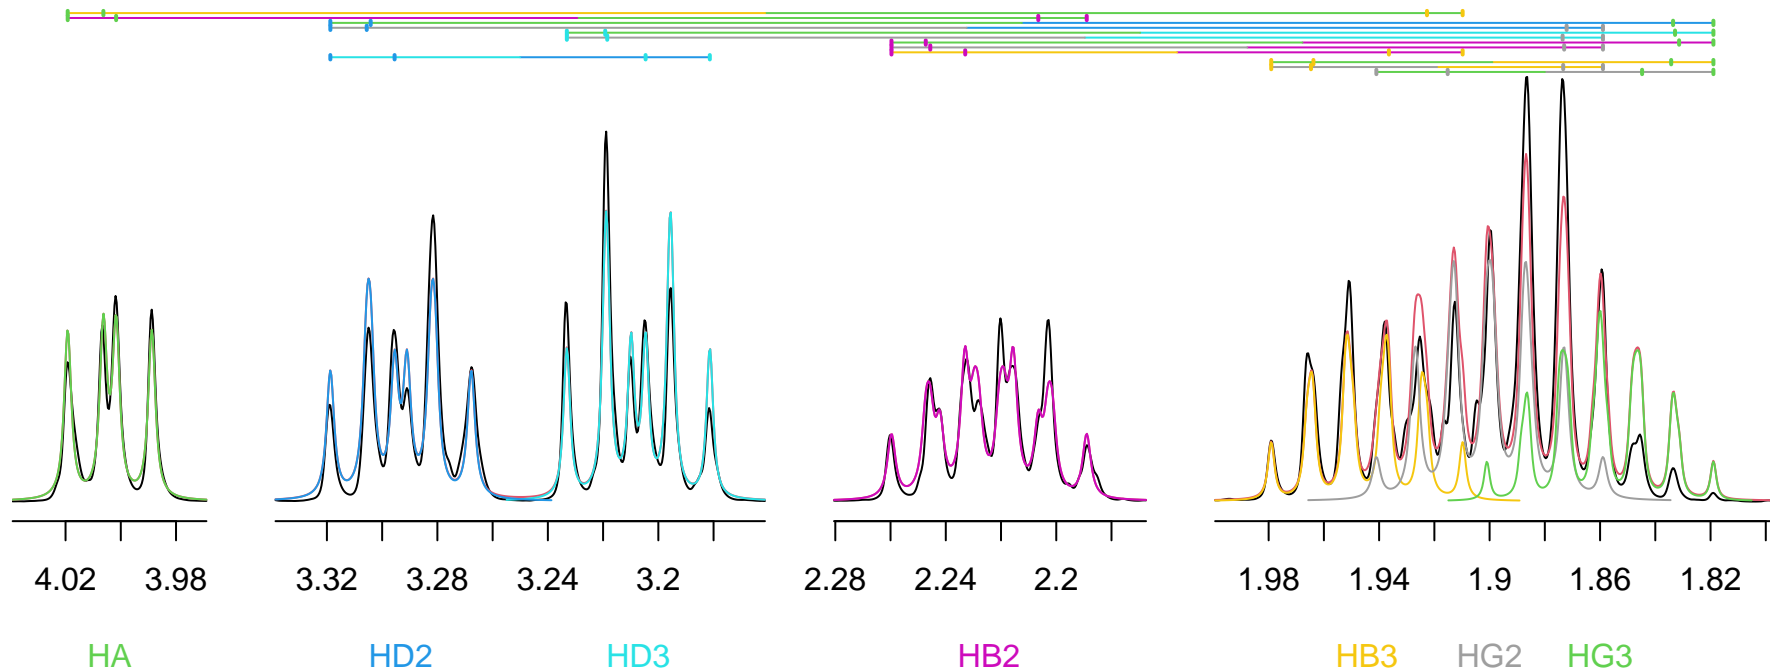

Supplement: Supplementary file 25 [file mr-2024-7-supplement.zip]

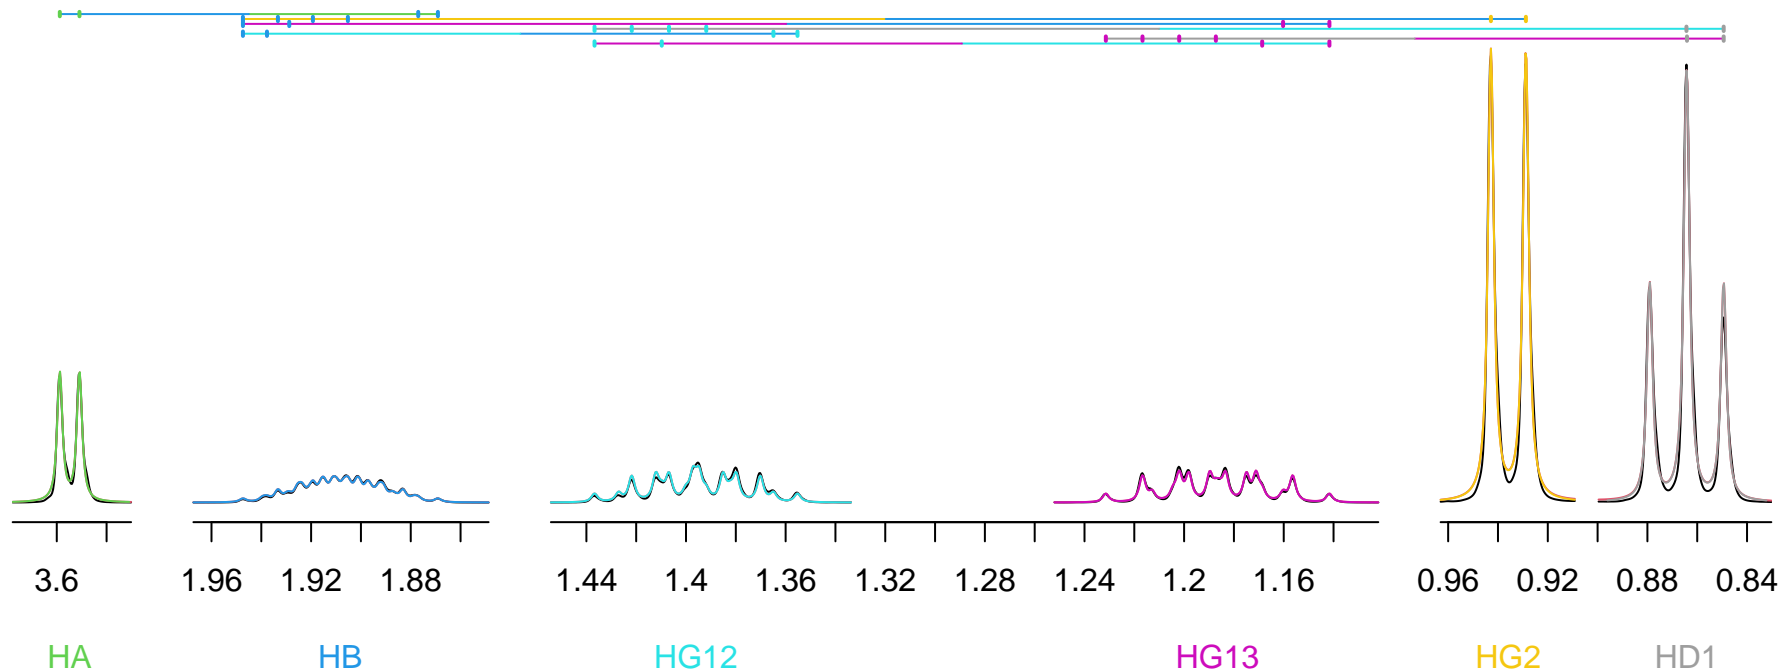

Supplement: Supplementary file 26 [file mr-2024-7-supplement.zip]

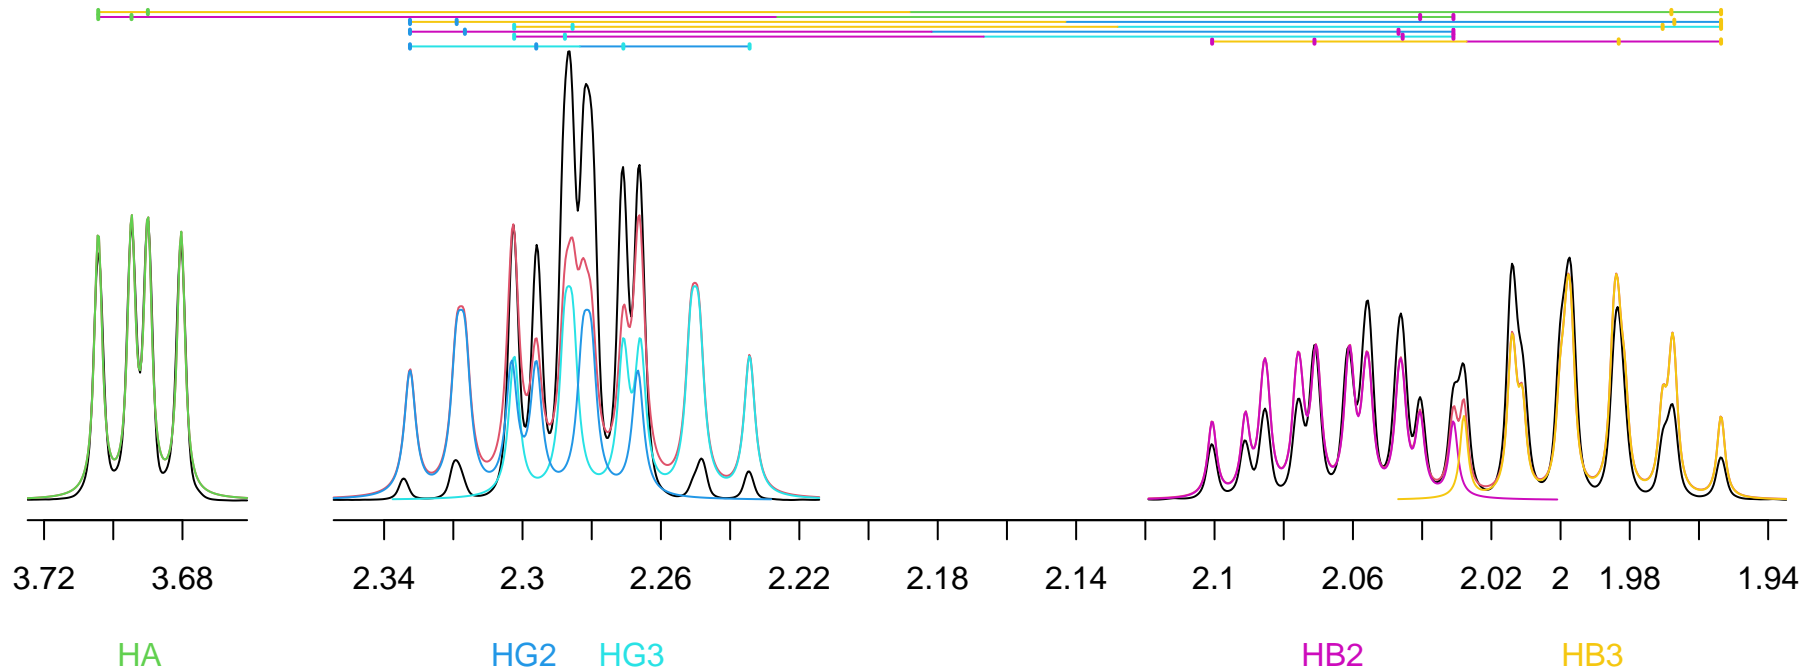

Supplement: Supplementary file 27 [file mr-2024-7-supplement.zip]

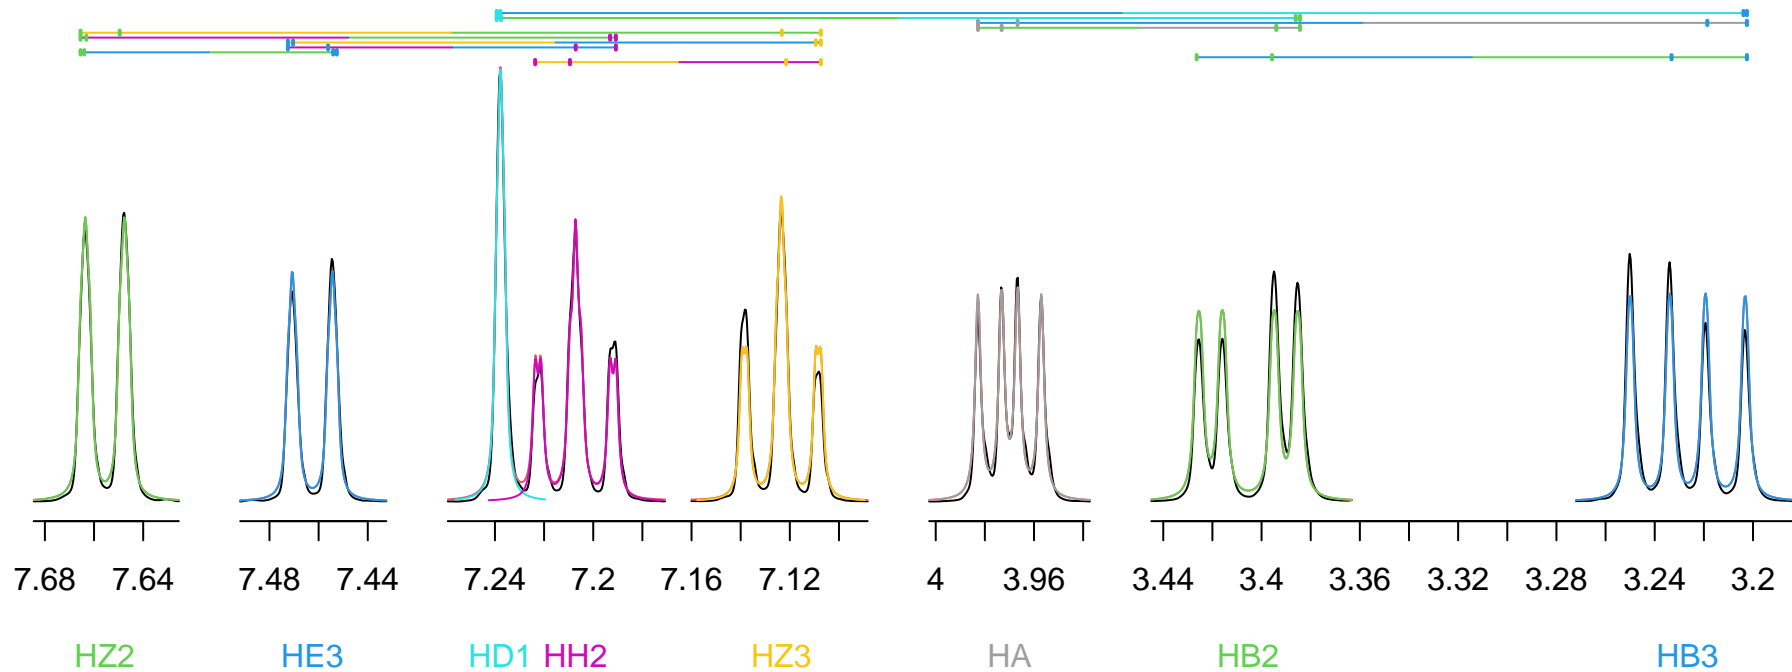

Supplement: Supplementary file 29 [file mr-2024-7-supplement.zip]

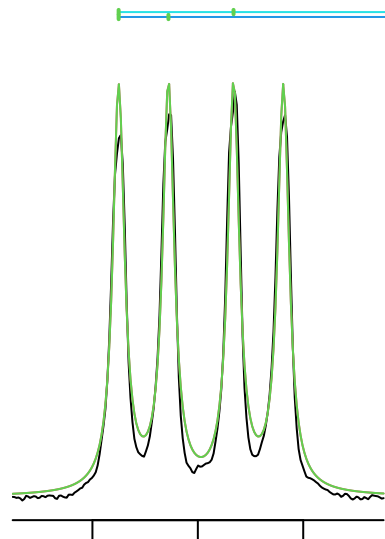

3.8 3.78 3.76

HA

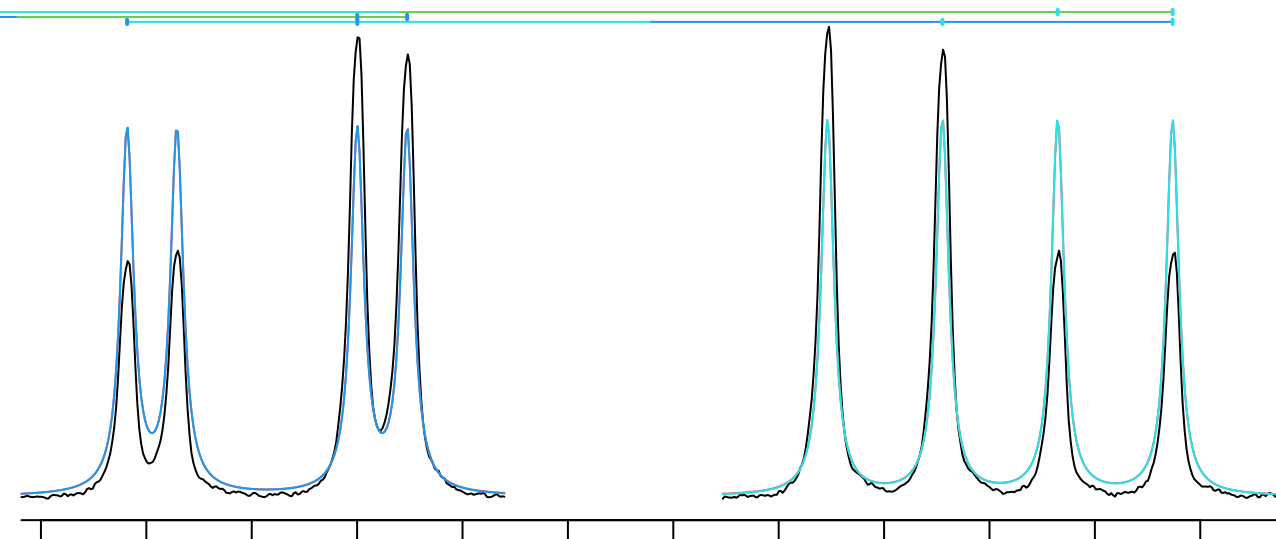

2.74 2.72 2.7 2.68 2.66 2.64 2.62 2.6 2.58 2.56 2.54 2.52

HB2

HB3

Supplement: Supplementary file 30 [file mr-2024-7-supplement.zip]

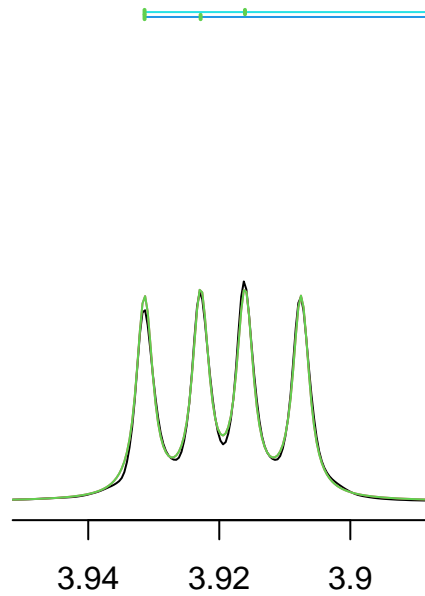

HA

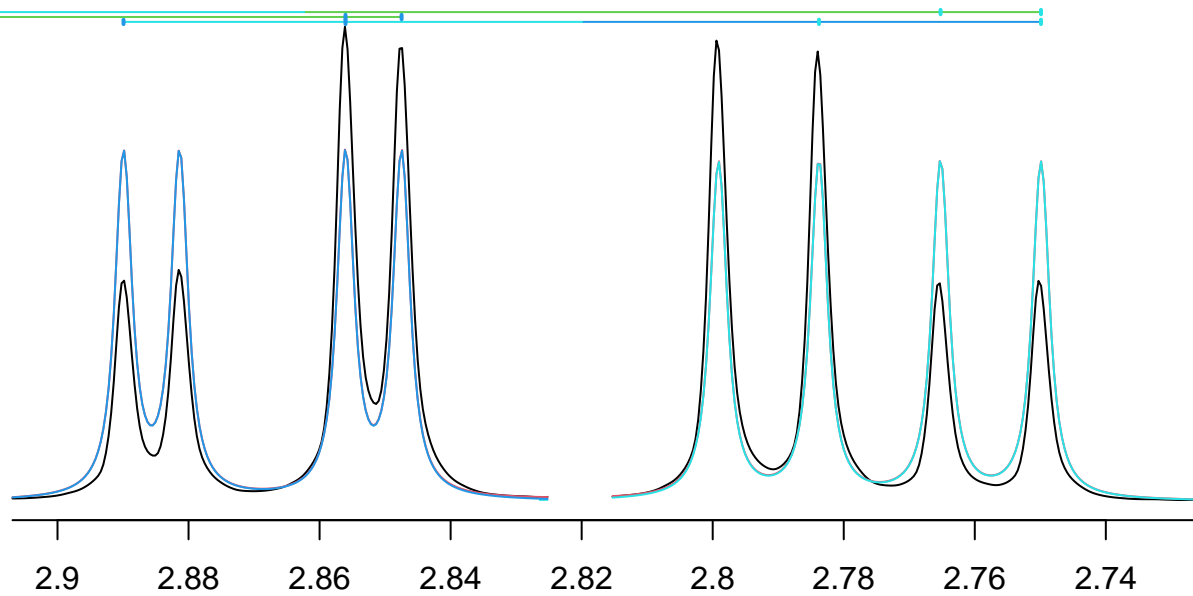

HB2

HB3

Supplement: Supplementary file 31 [file mr-2024-7-supplement.zip]

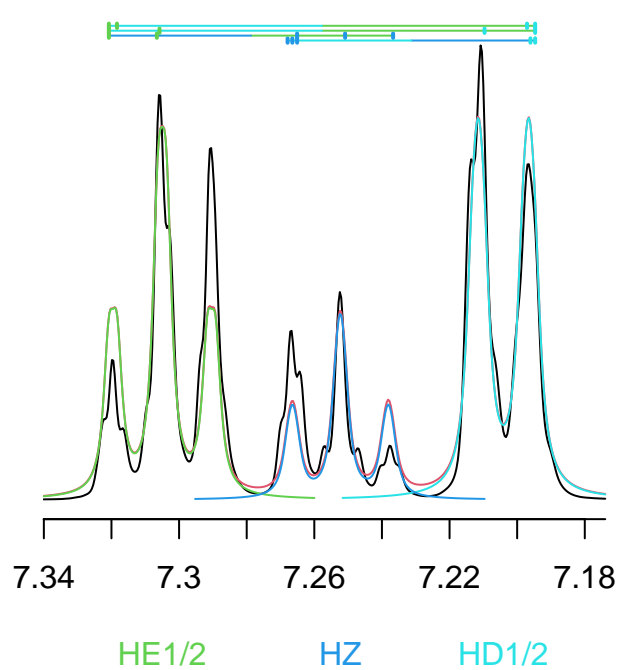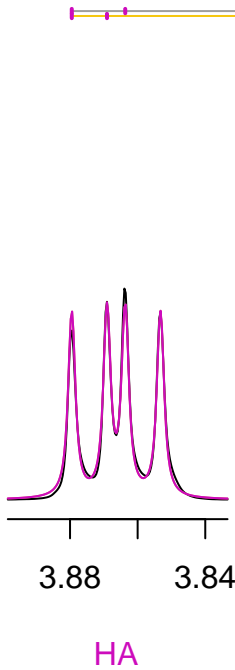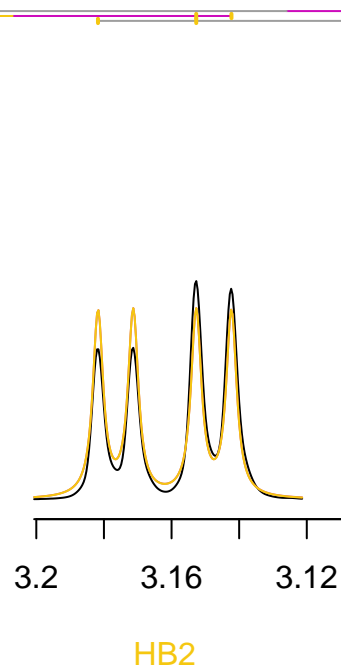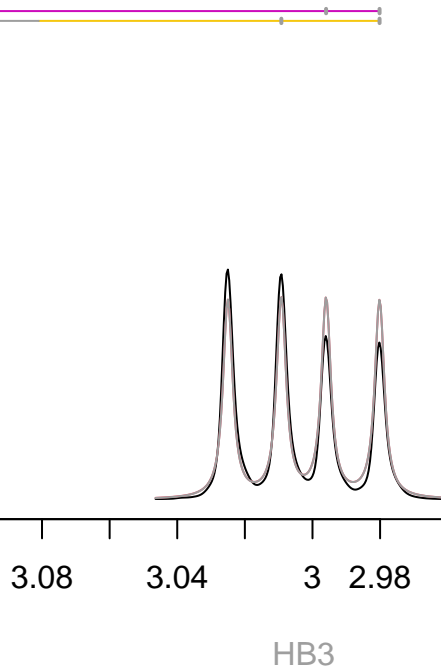

Supplement: Supplementary file 32 [file mr-2024-7-supplement.zip]

HA

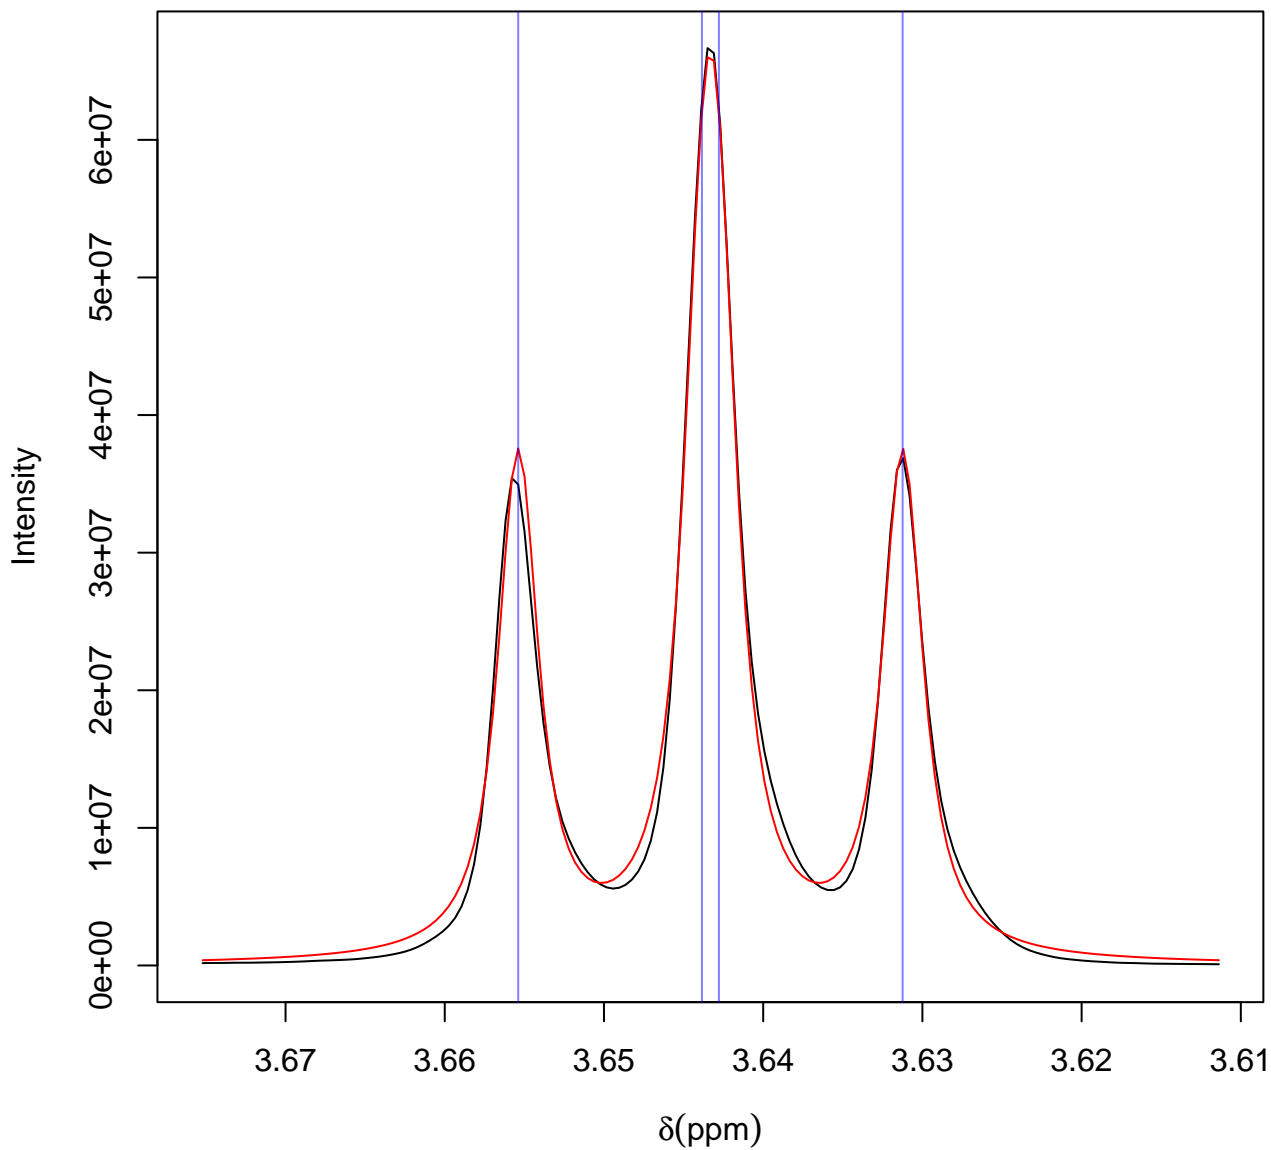

# HB3

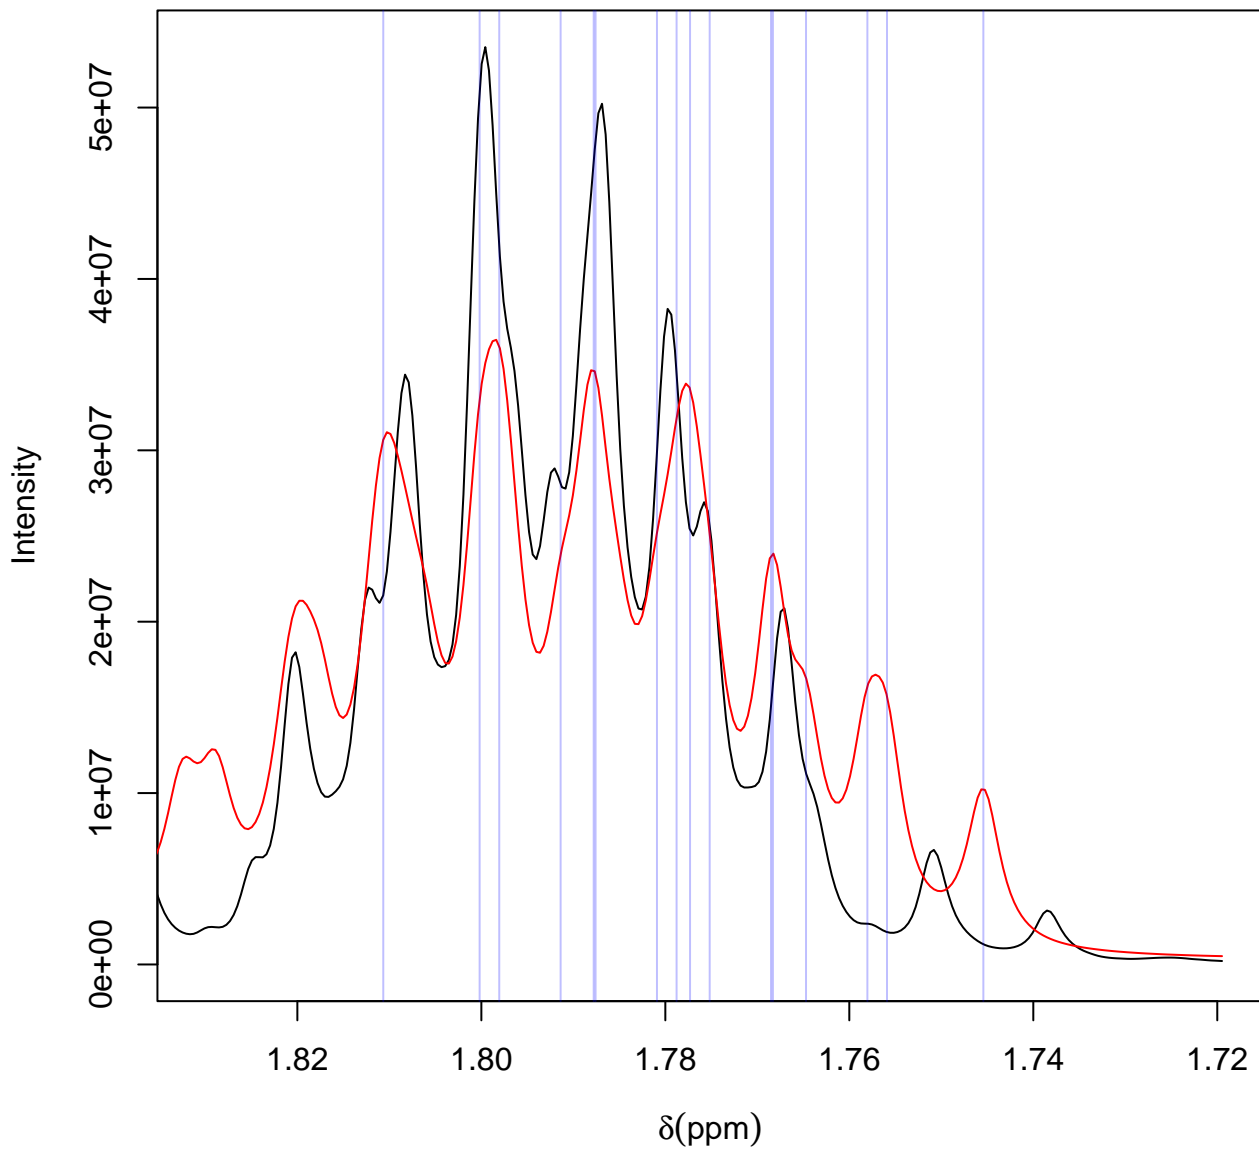

# HB2

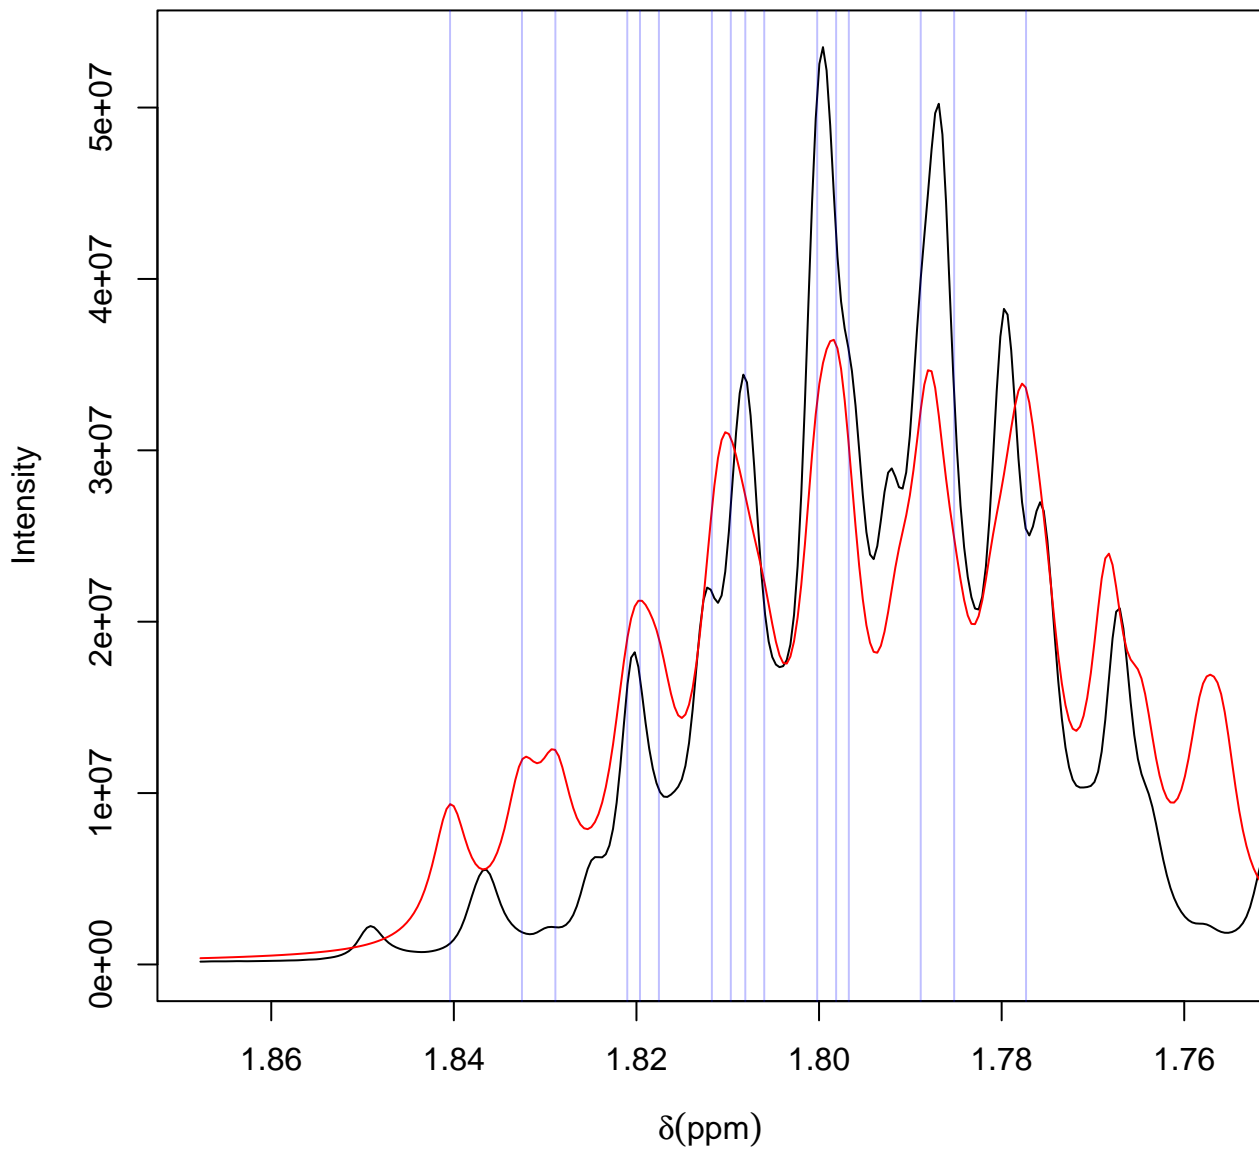

# HG2

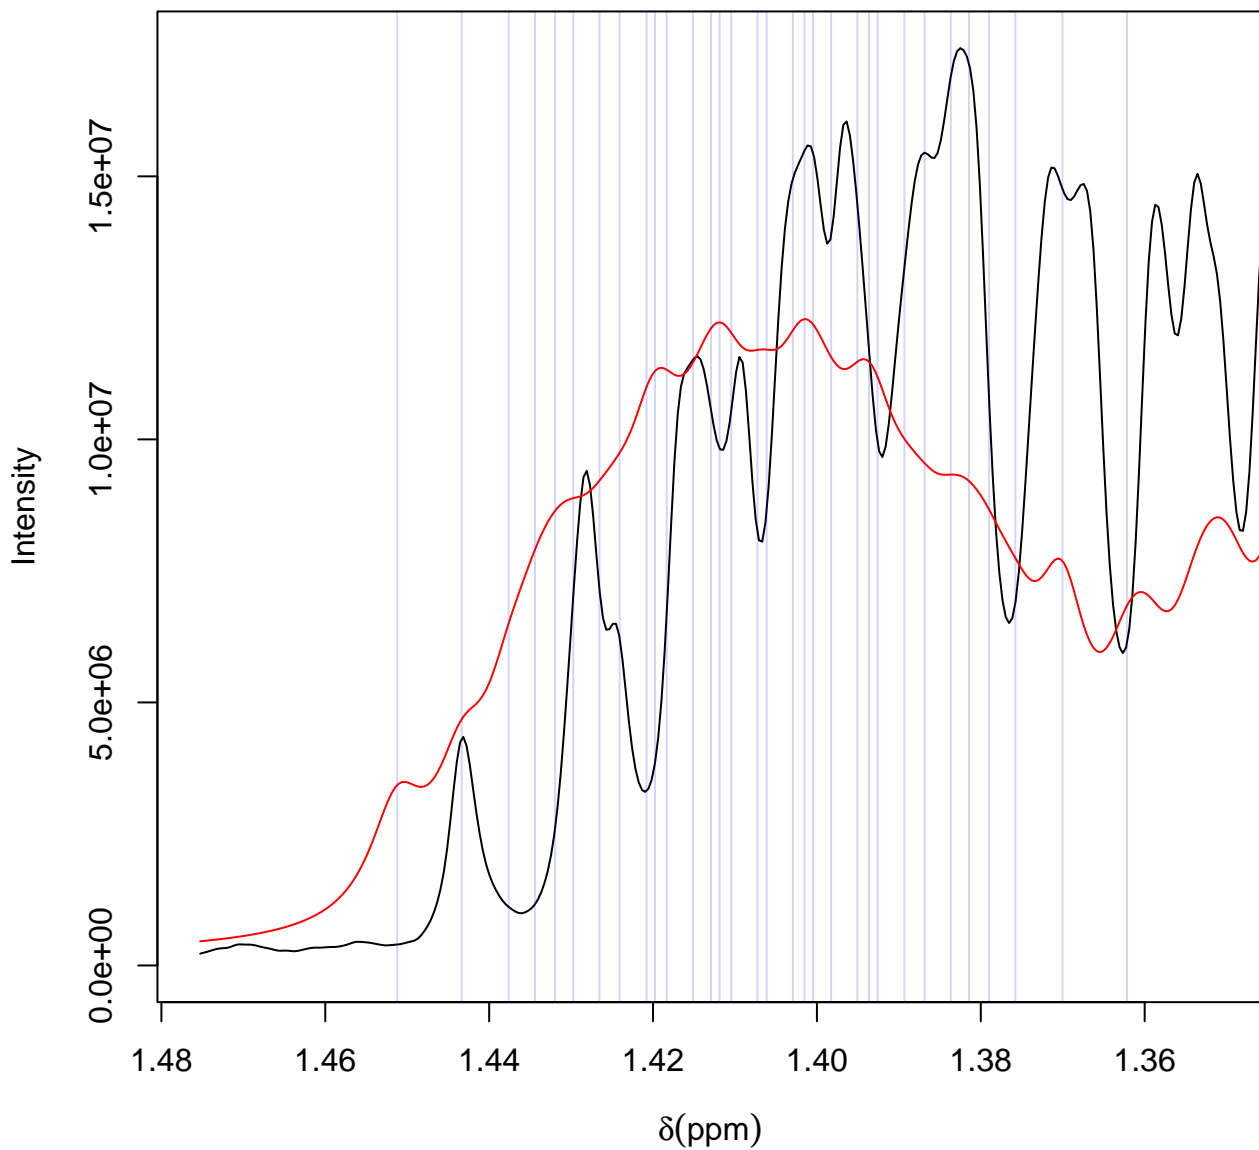

# HG3

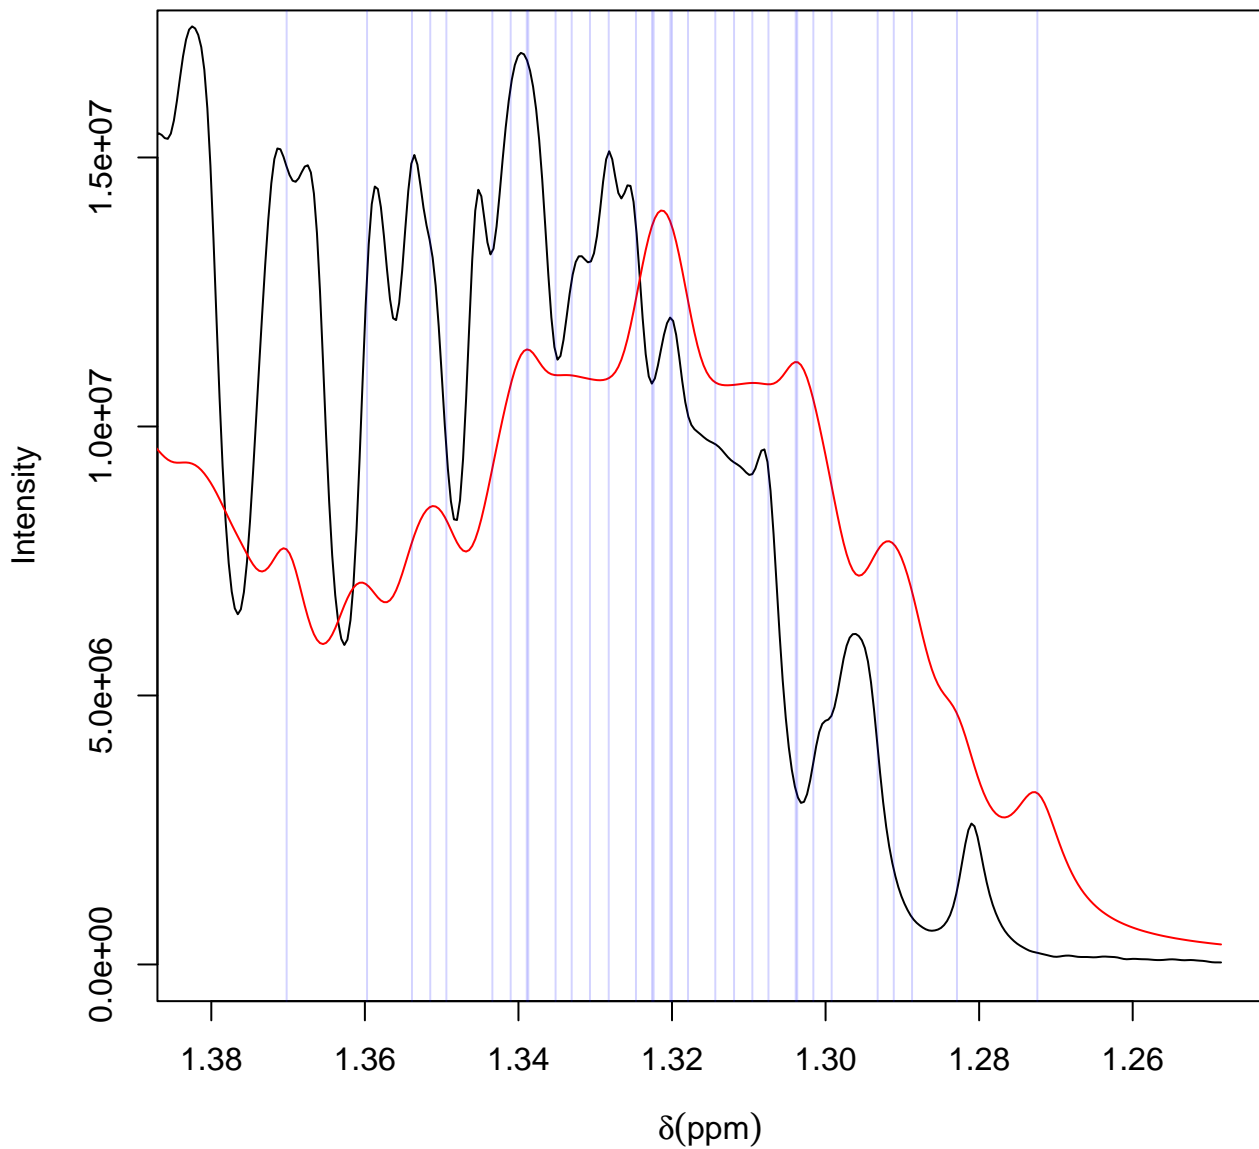

# HD3

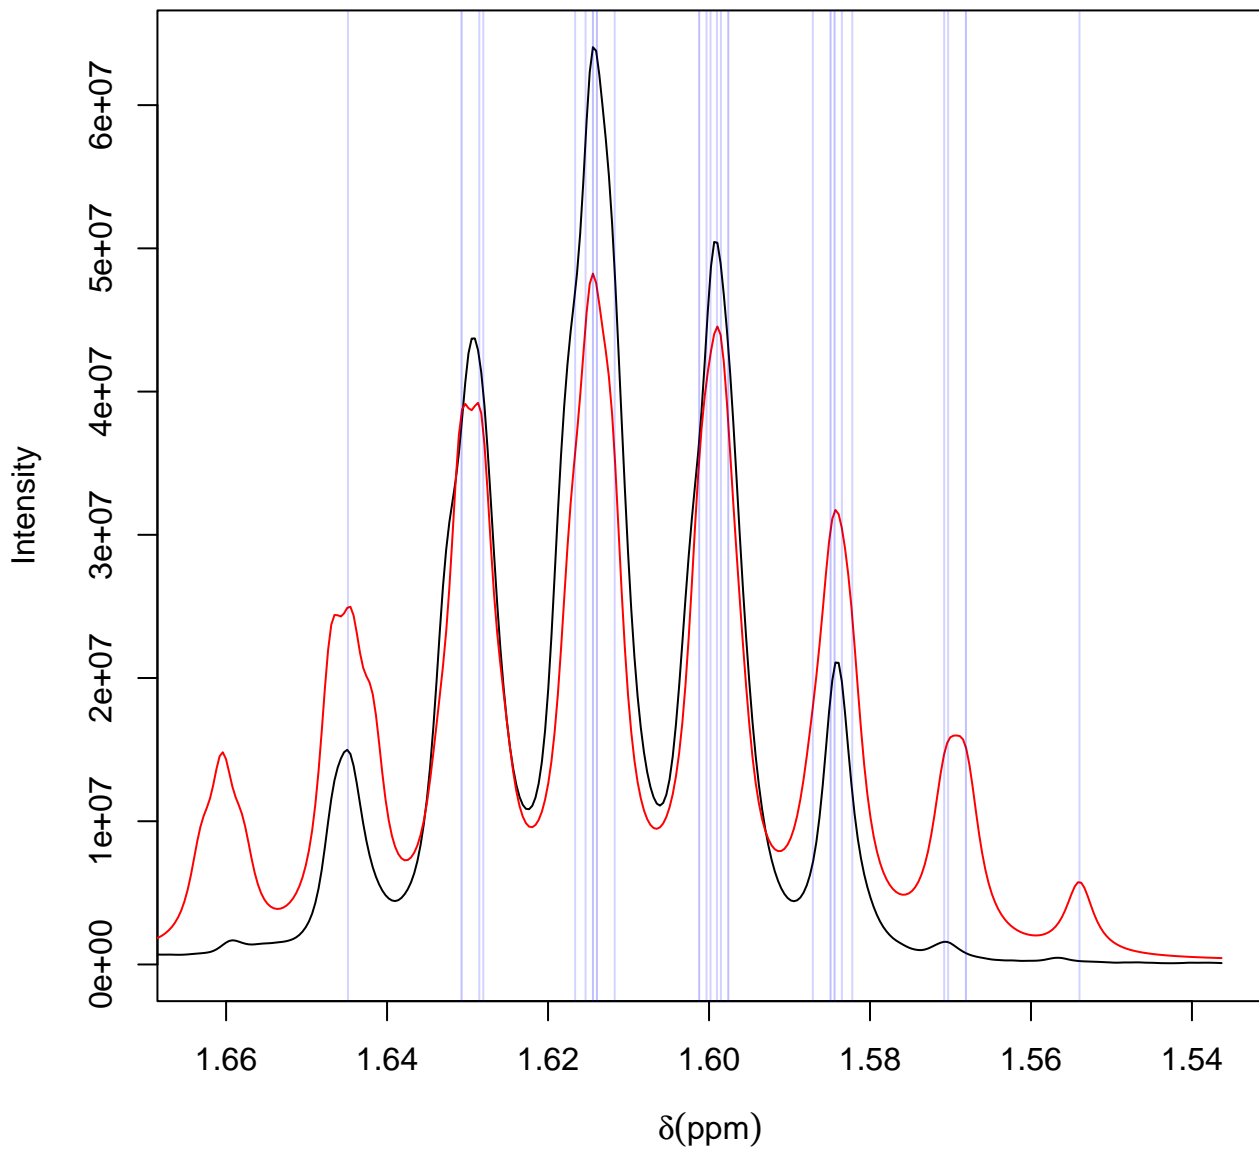

# HD2

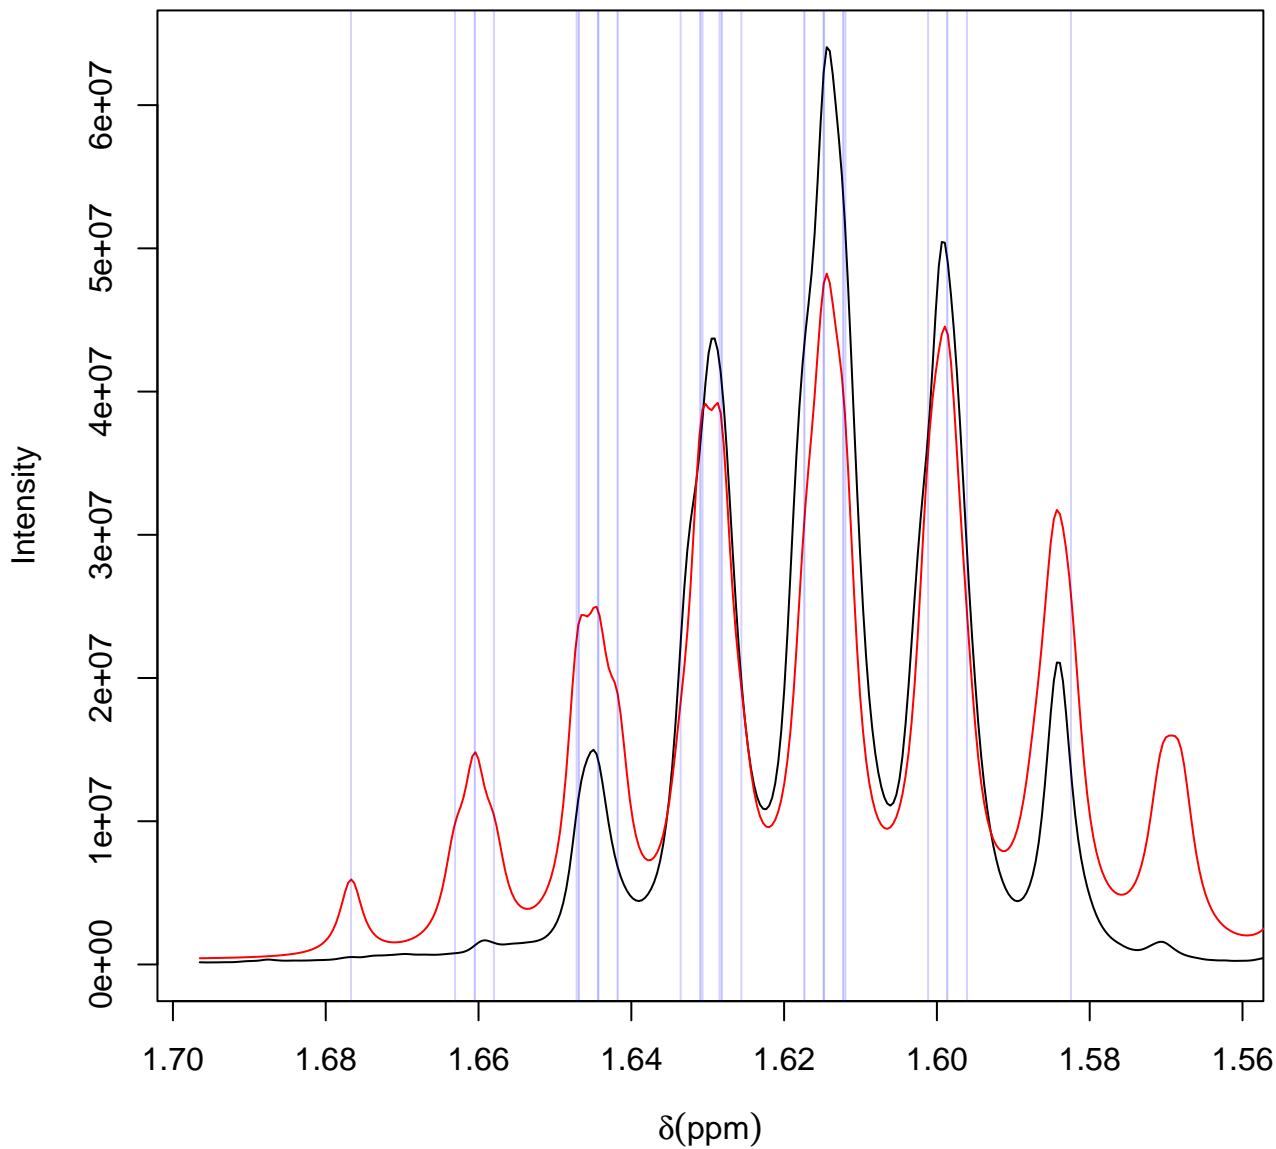

# HE2/3

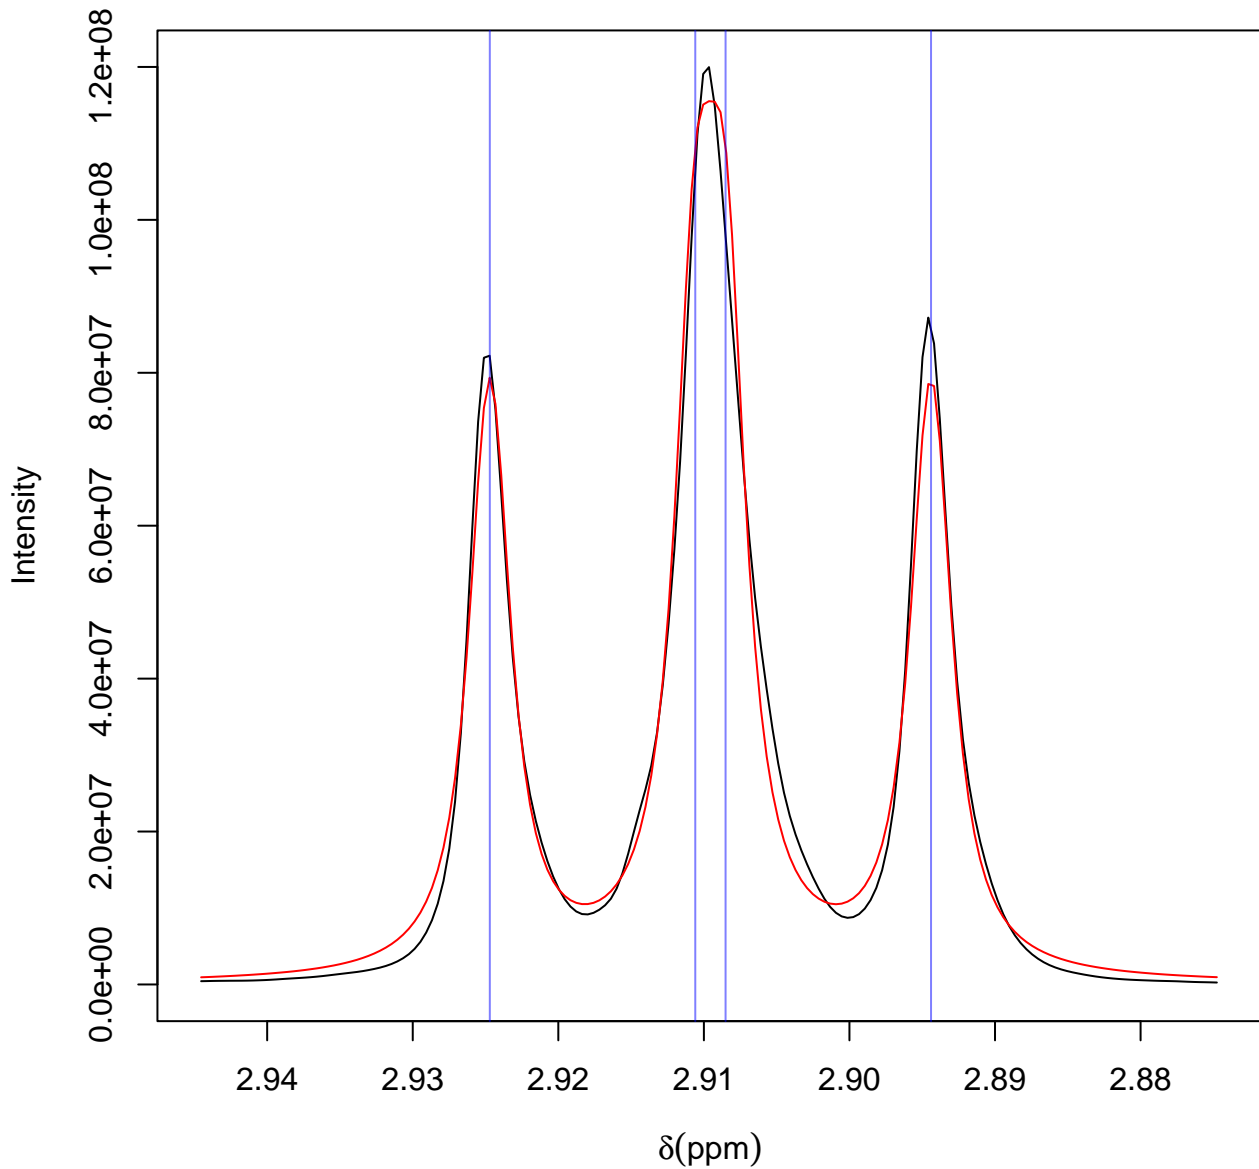

Supplement: Supplementary file 33 [file mr-2024-7-supplement.zip]

HA

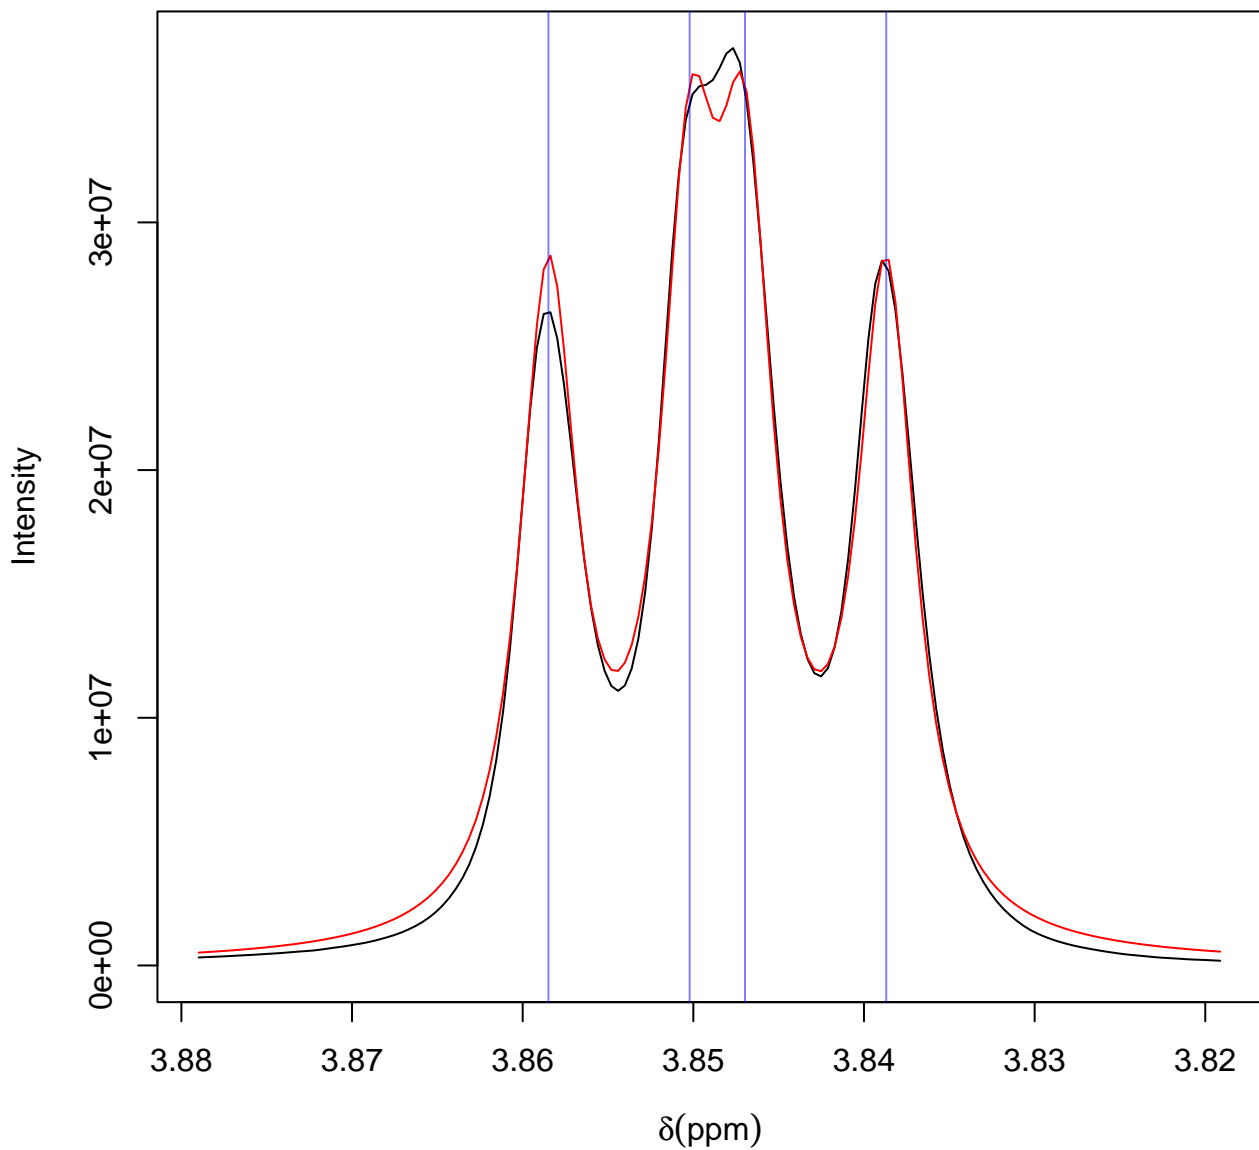

# HB2

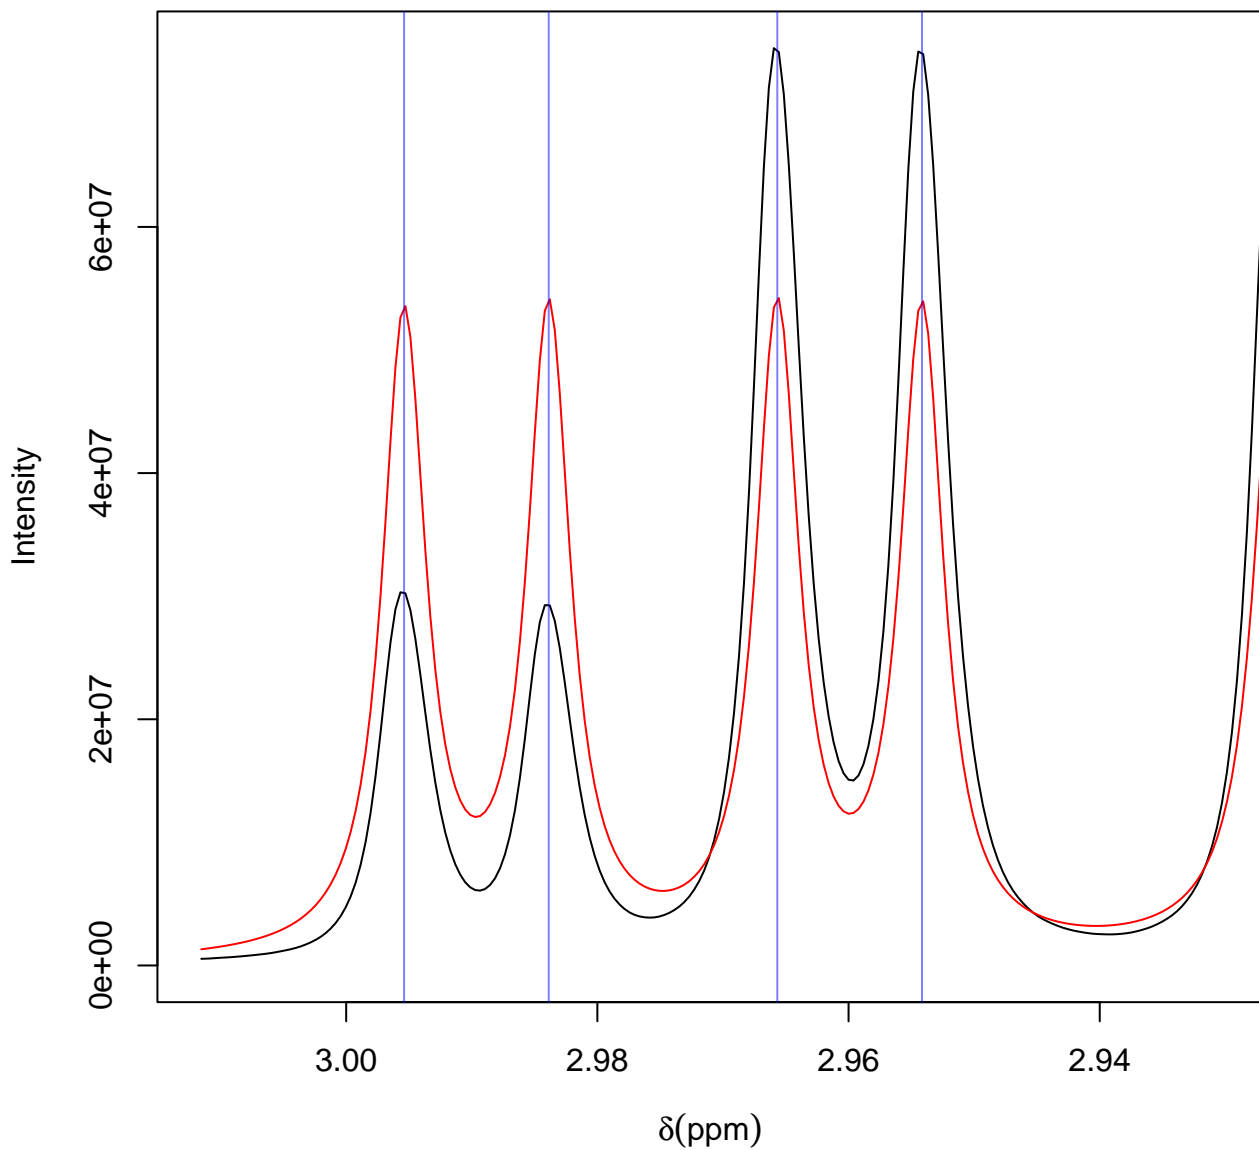

# HB3

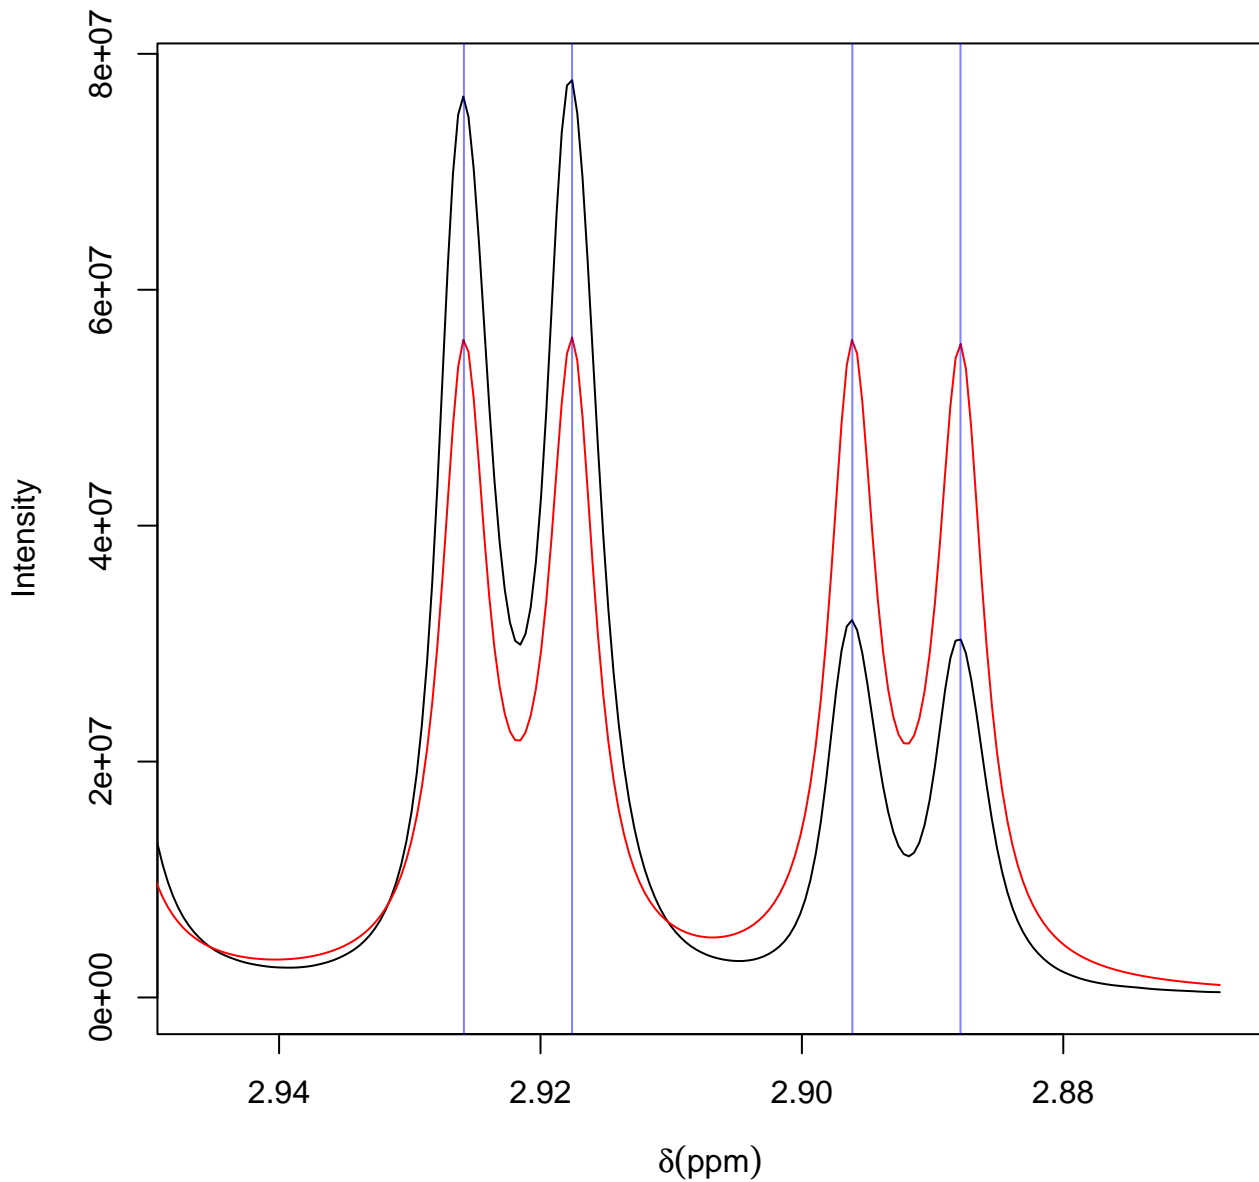

Supplement: Supplementary file 34 [file mr-2024-7-supplement.zip]

HA

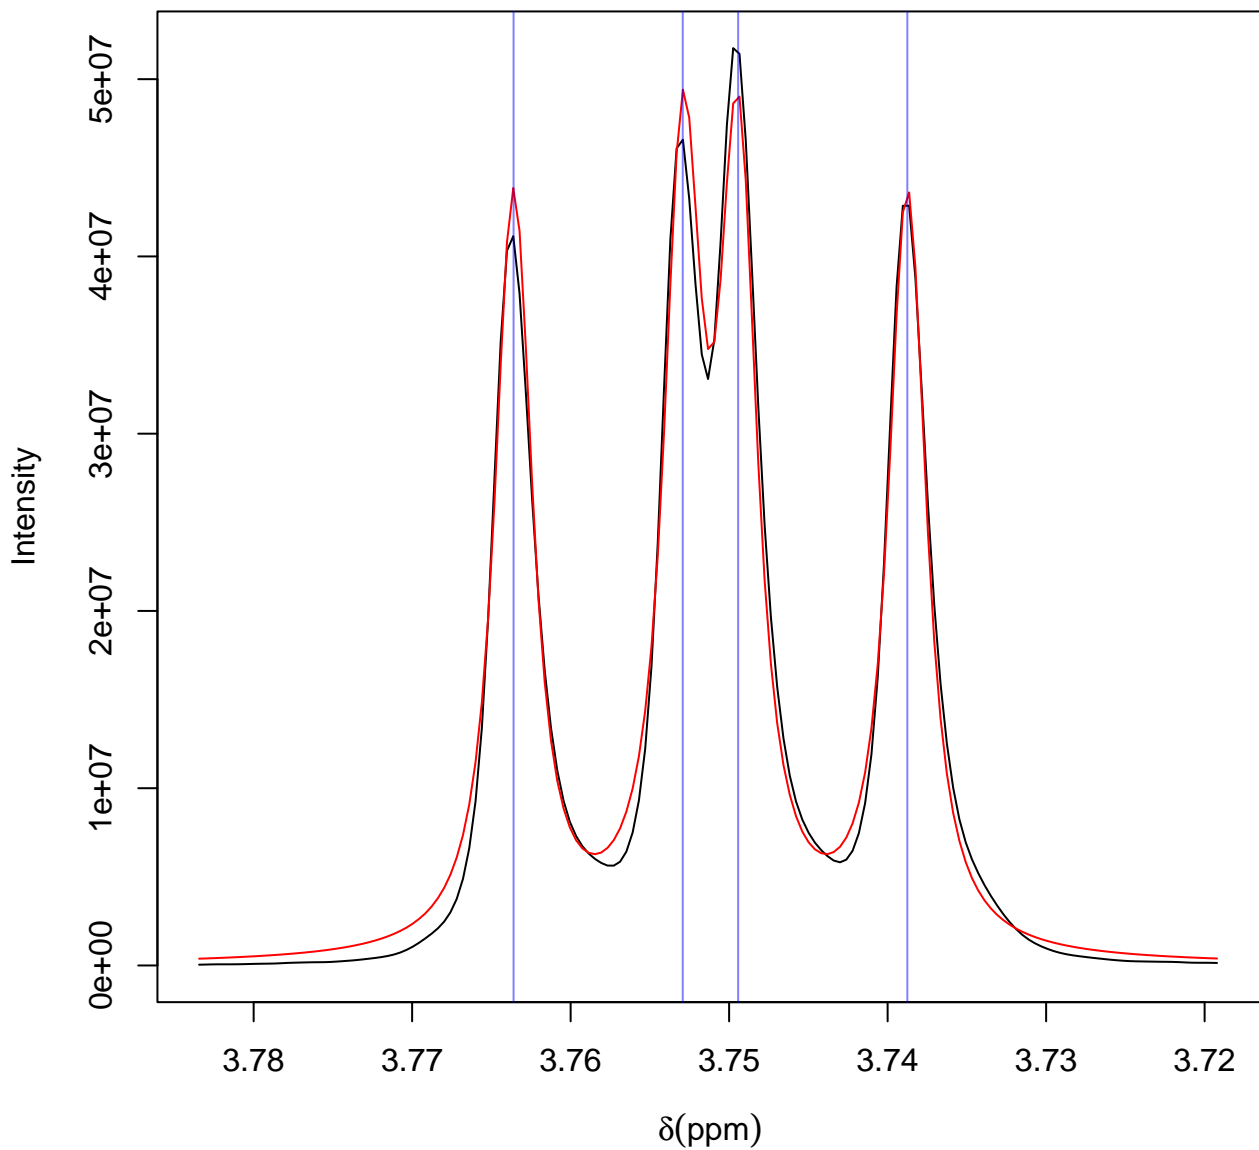

# HB2

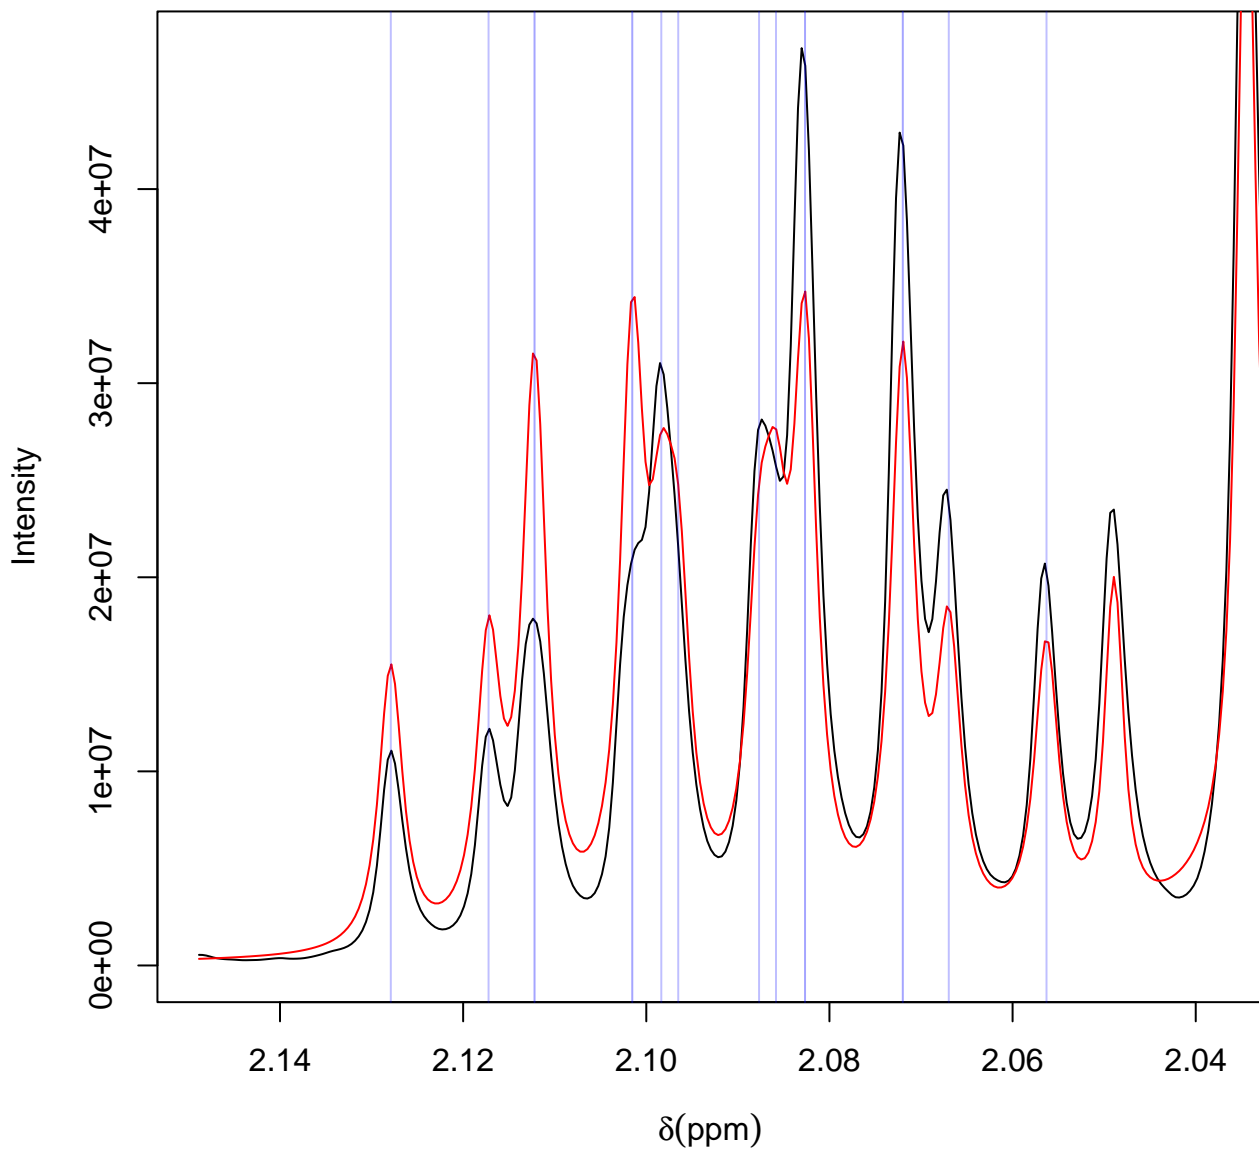

# HB3

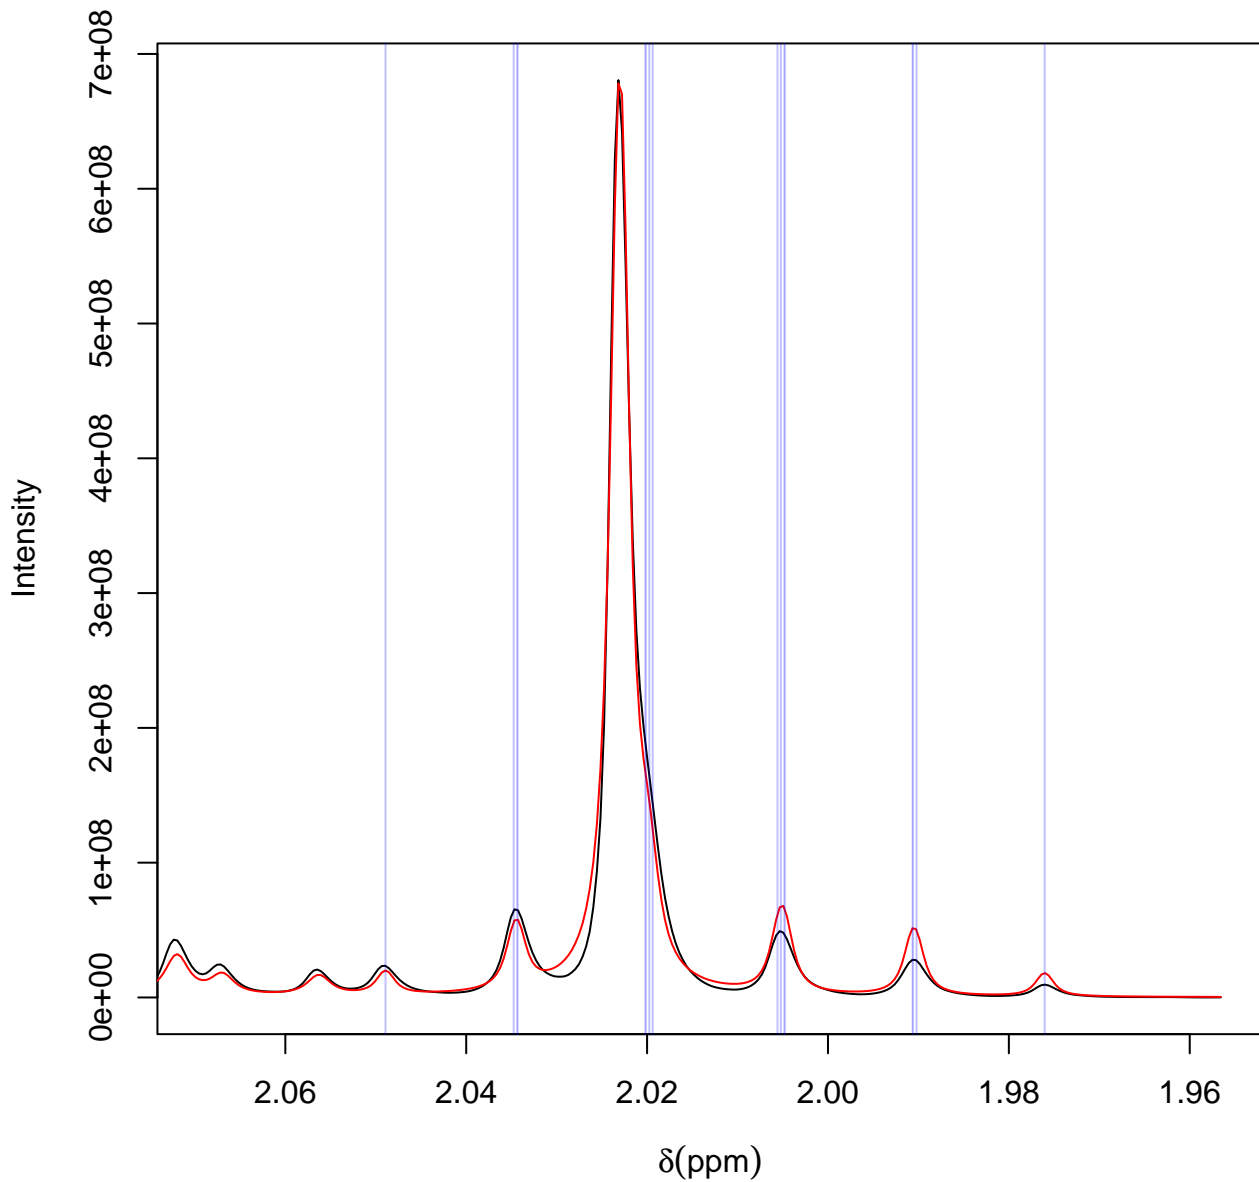

# HG2/3

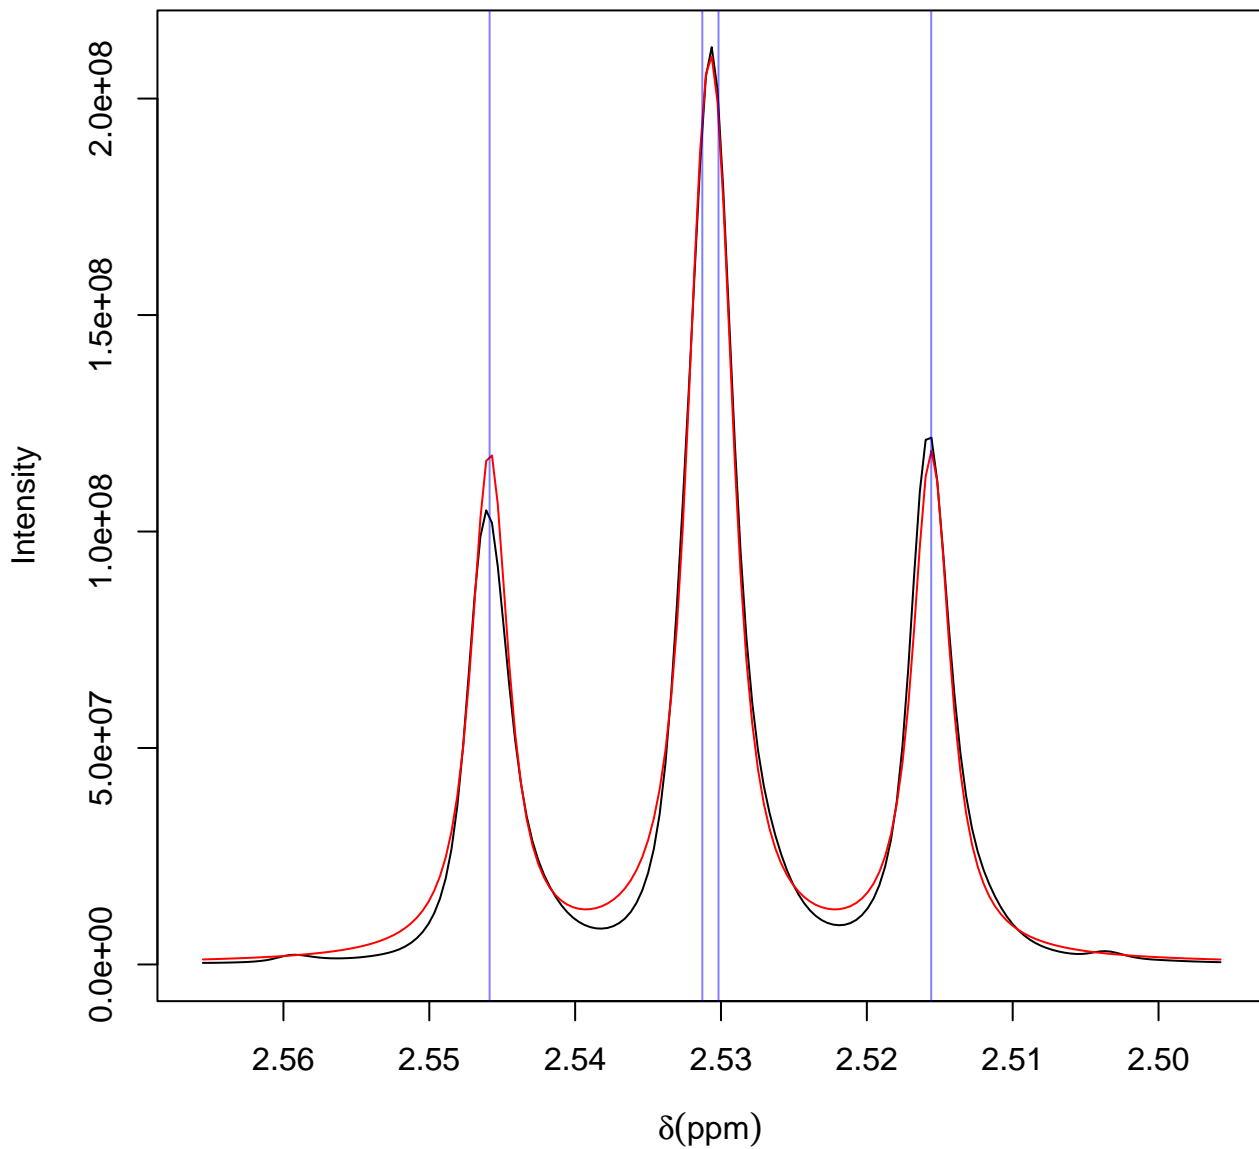

HE

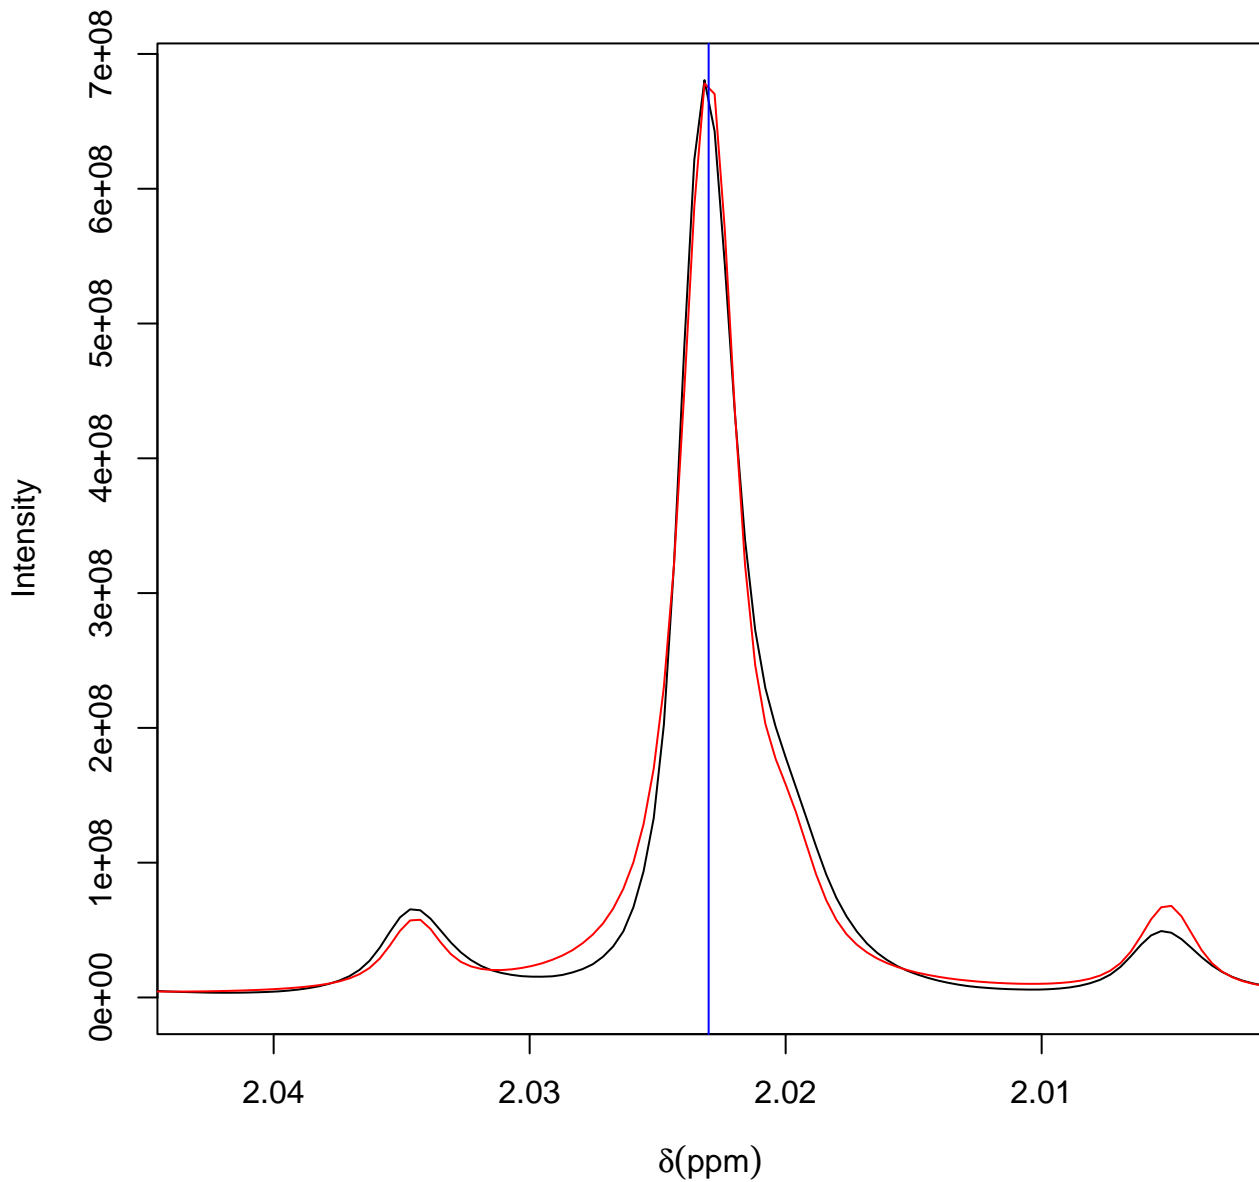

Supplement: Supplementary file 36 [file mr-2024-7-supplement.zip]

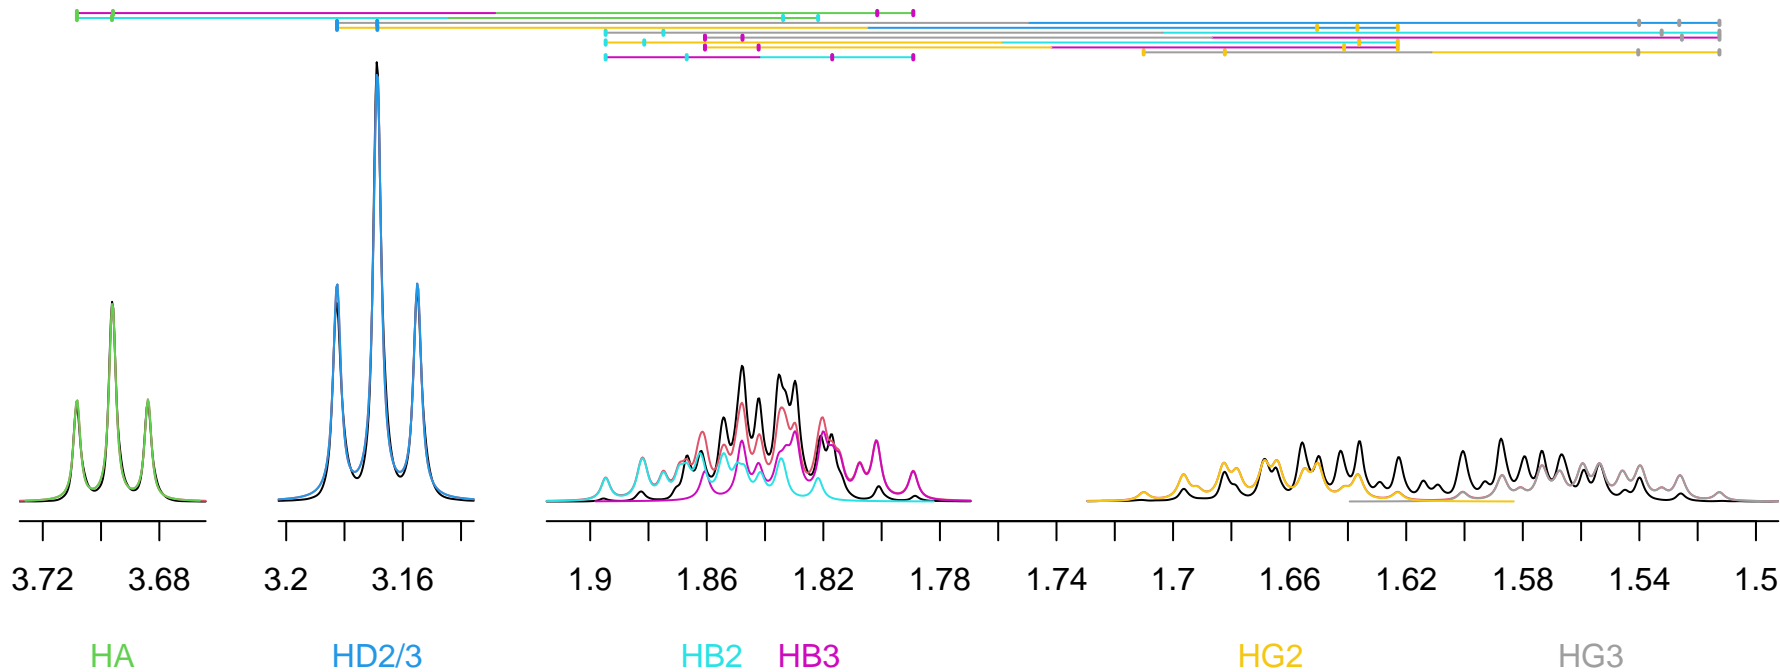

Supplement: Supplementary file 37 [file mr-2024-7-supplement.zip]

HA

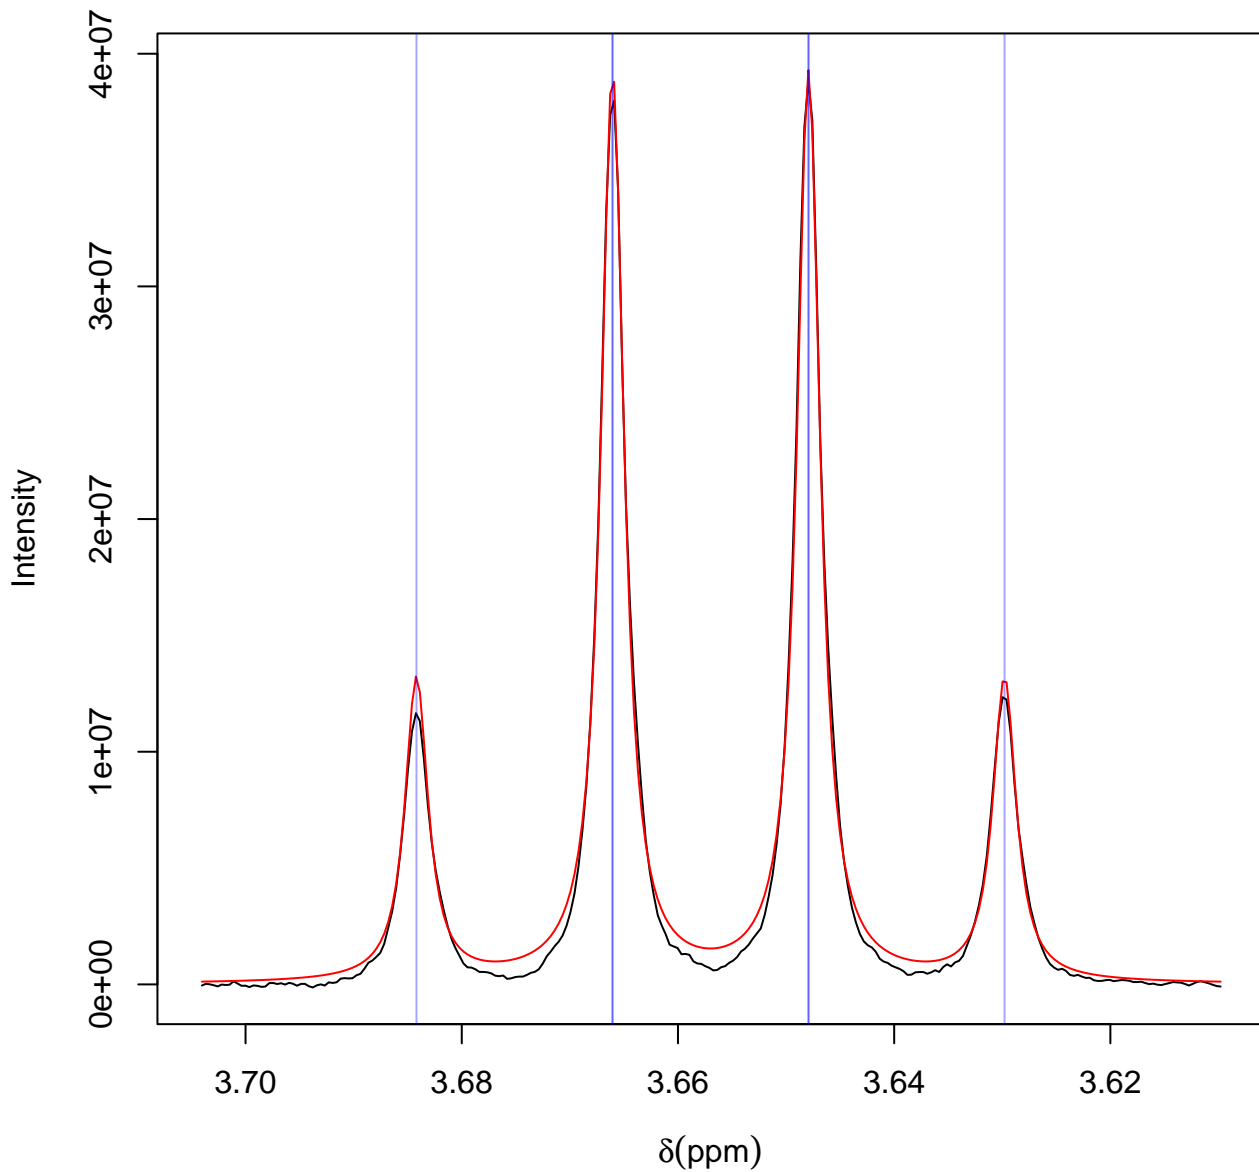

**HB**

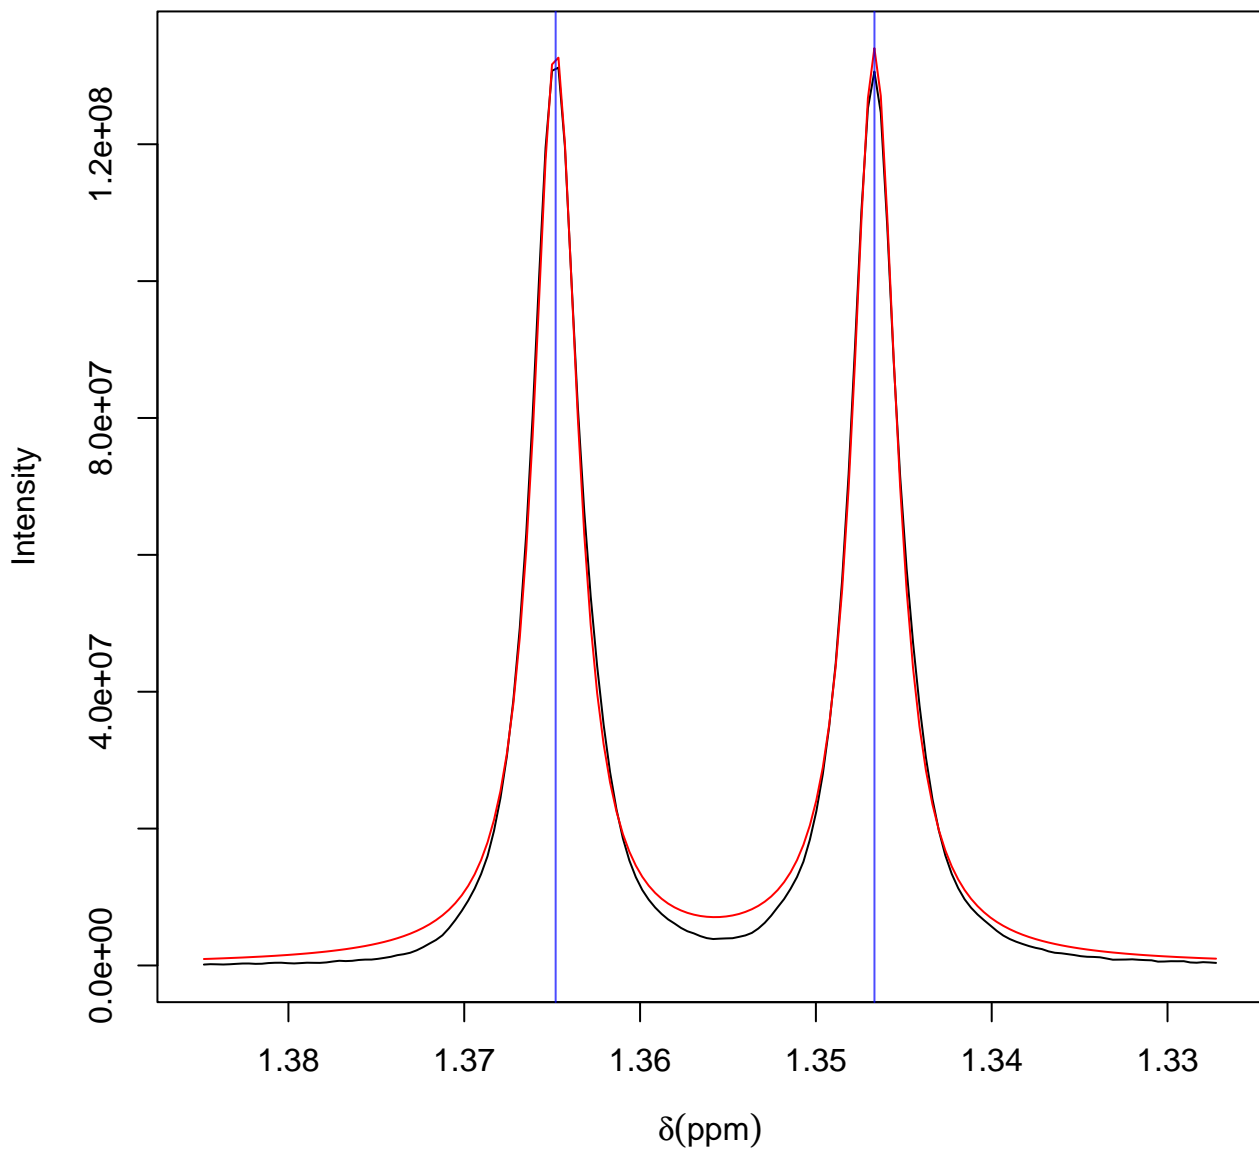

Supplement: Supplementary file 38 [file mr-2024-7-supplement.zip]

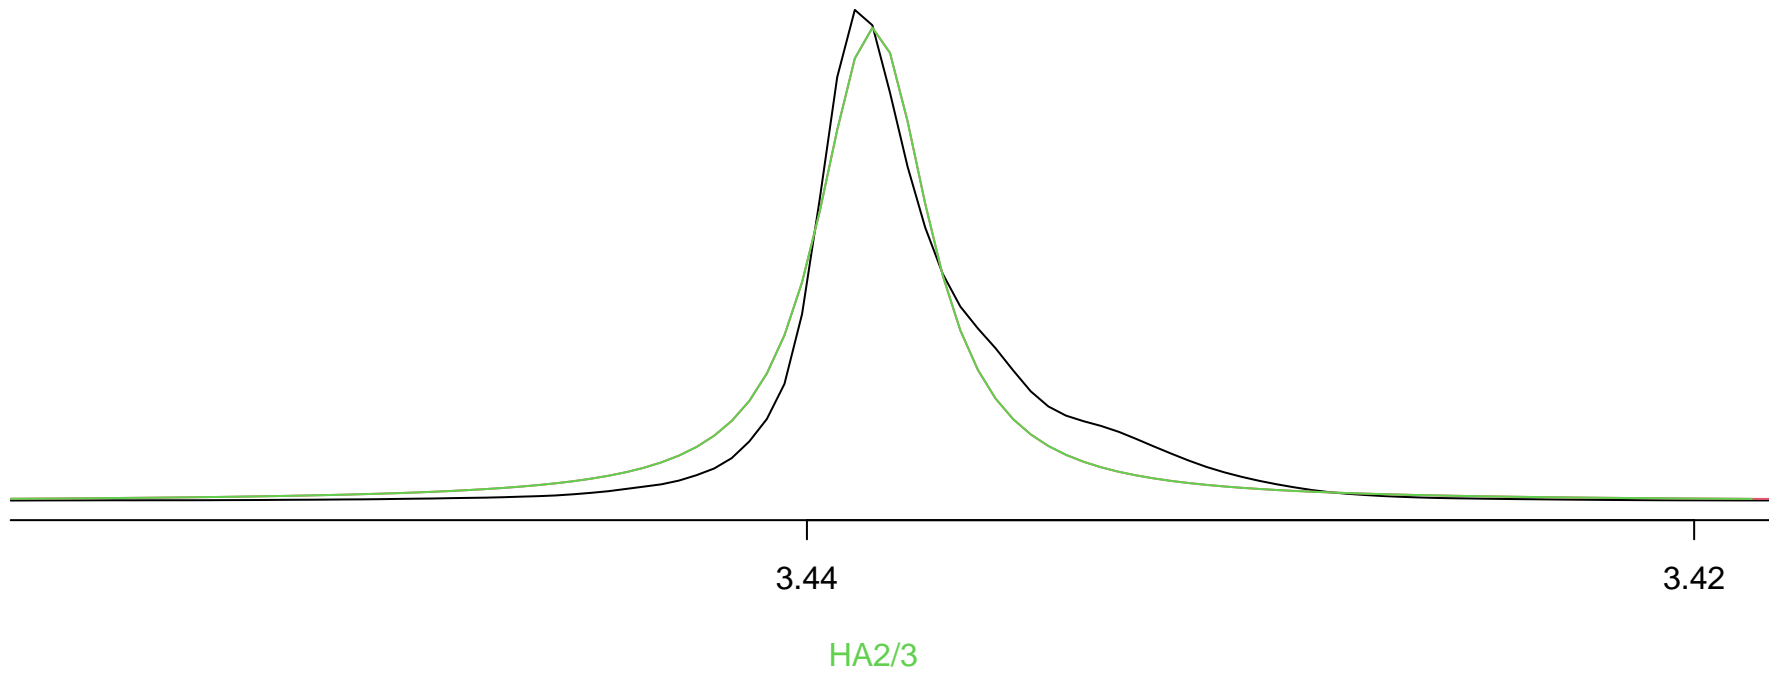

Supplement: Supplementary file 39 [file mr-2024-7-supplement.zip]

HA

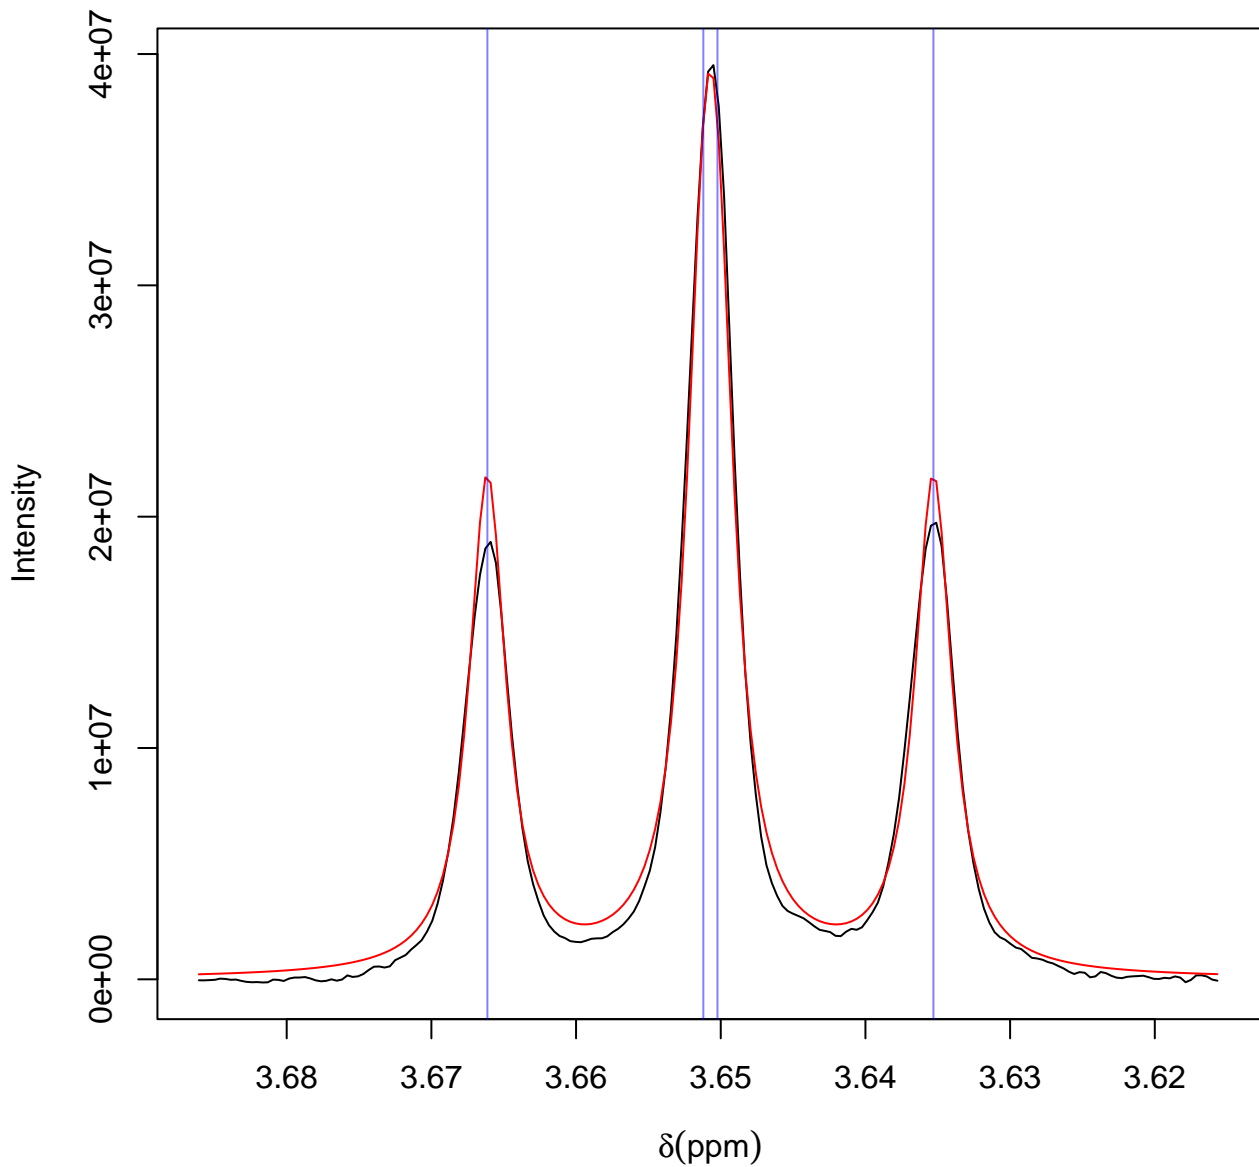

# HB2

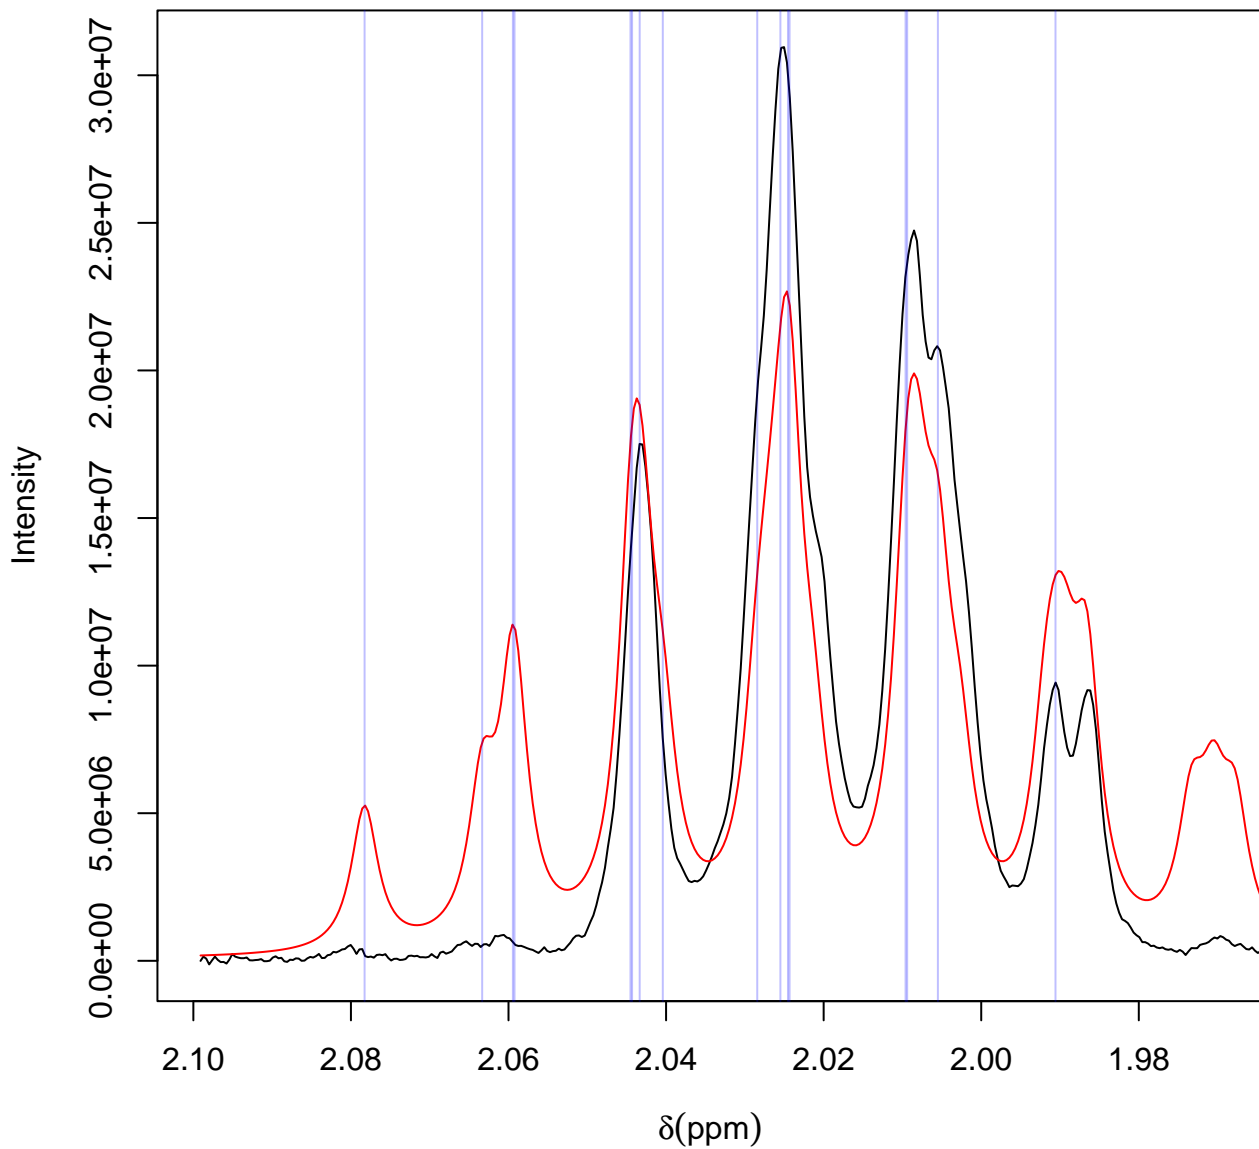

# HB3

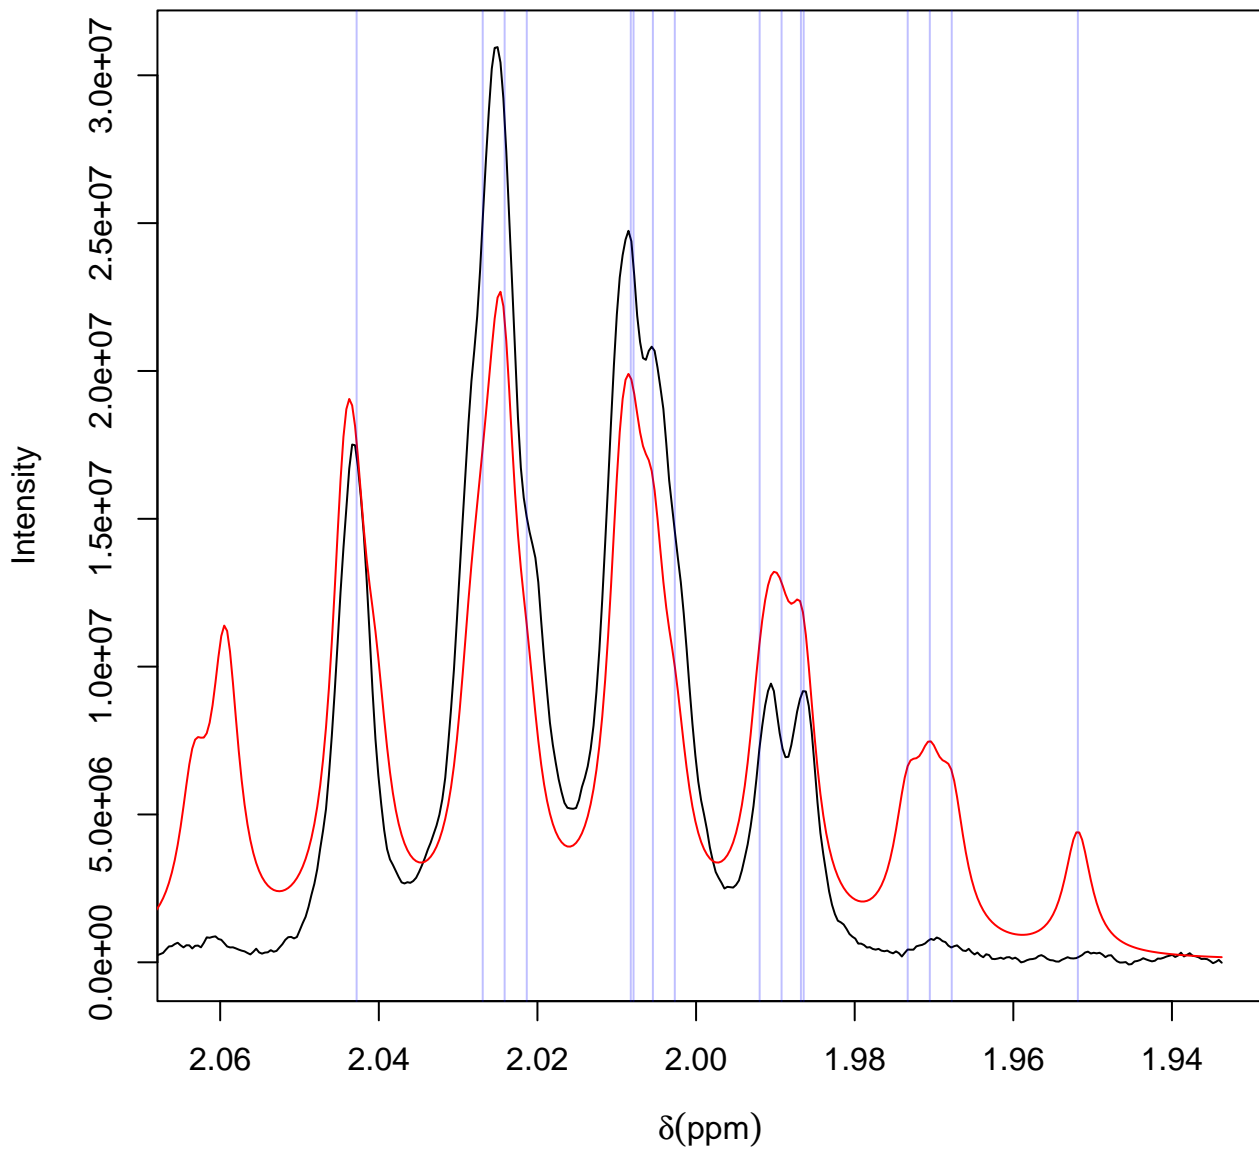

# HG3

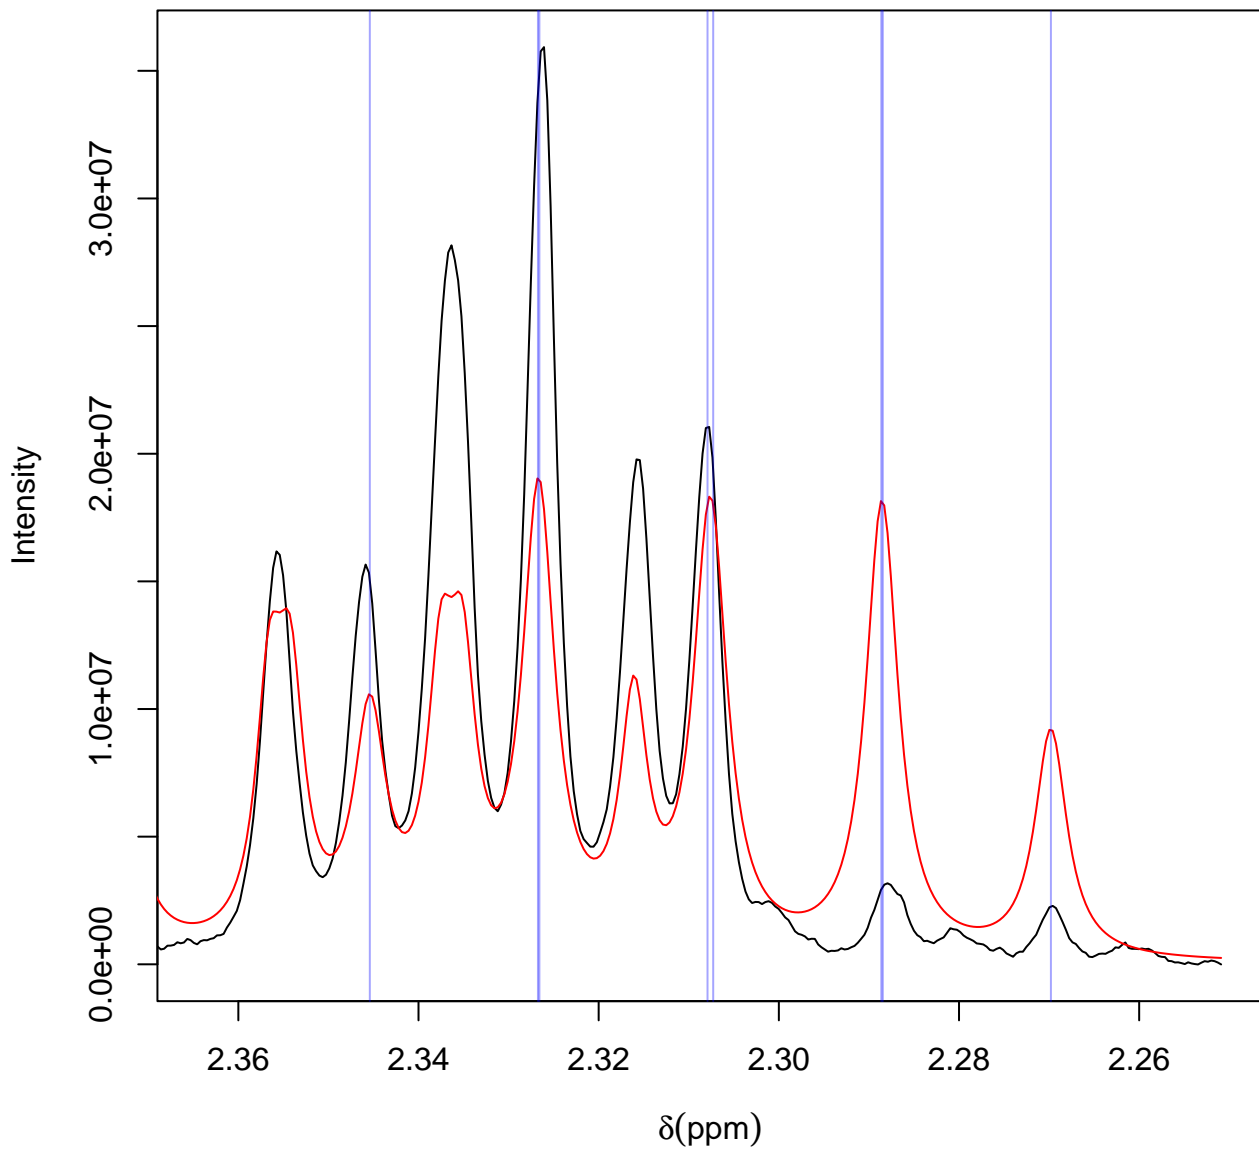

# HG2

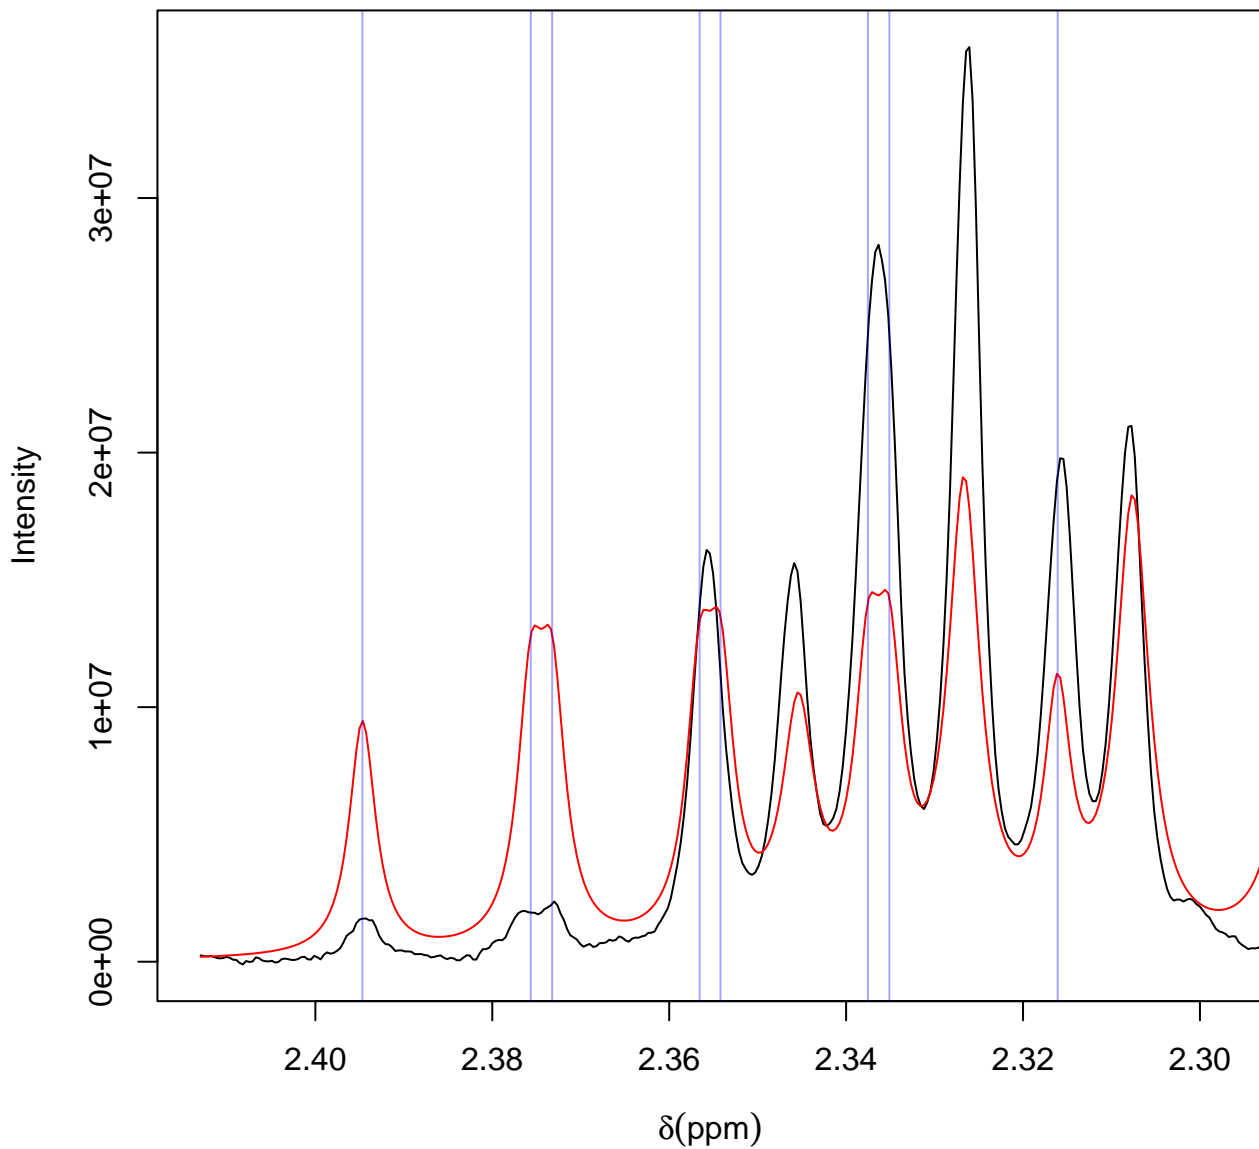

Supplement: Supplementary file 40 [file mr-2024-7-supplement.zip]

# HA2/3

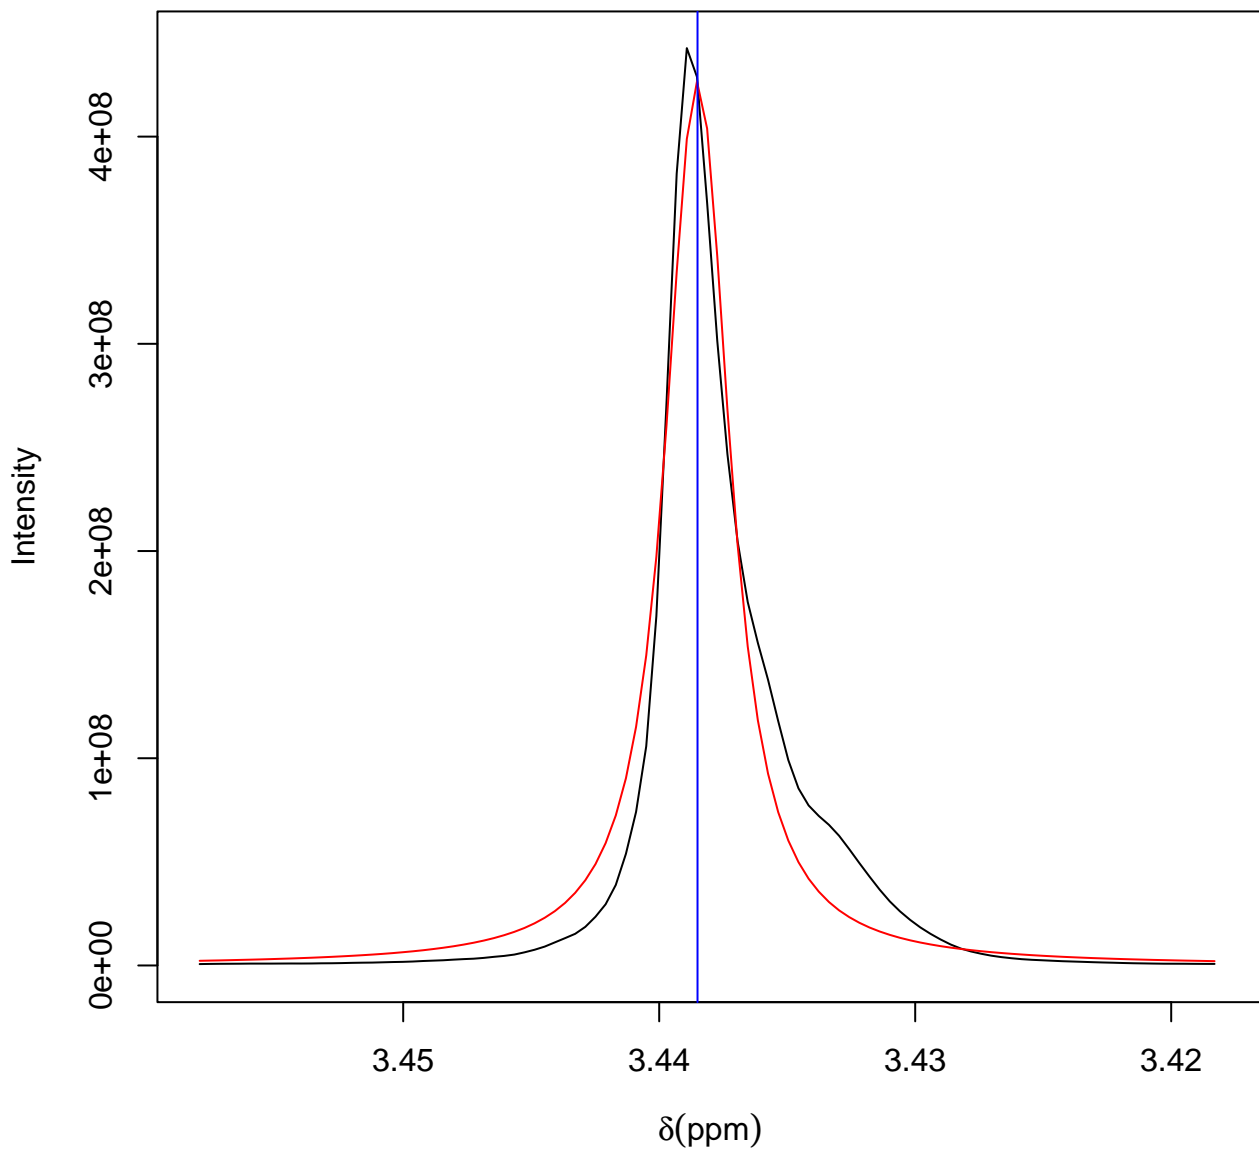

Supplement: Supplementary file 41 [file mr-2024-7-supplement.zip]

HA

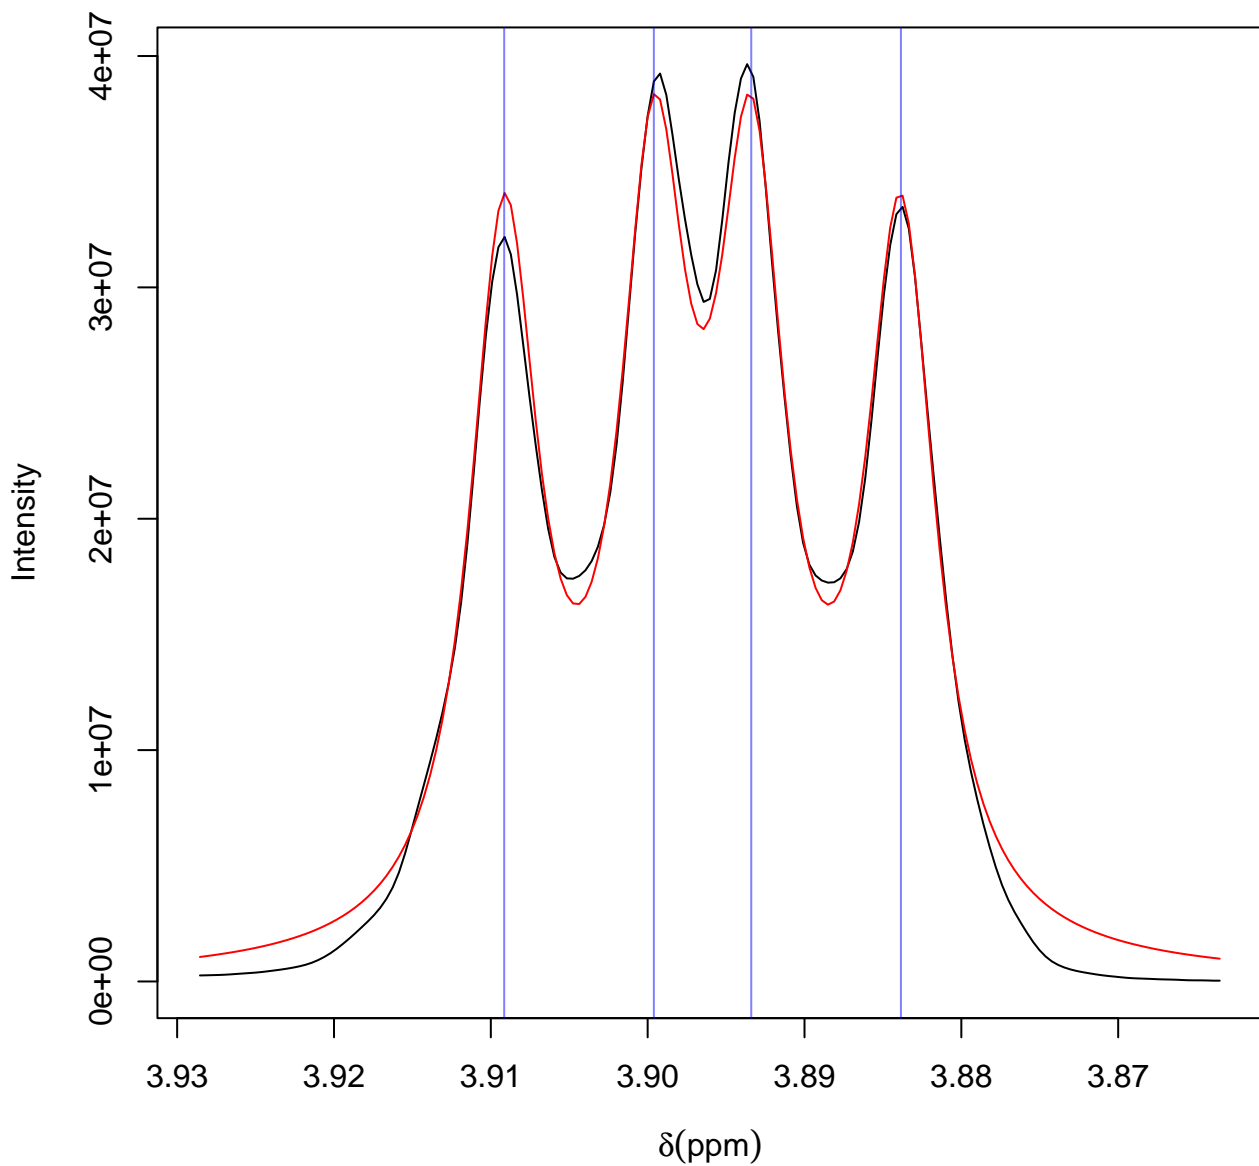

# HB2

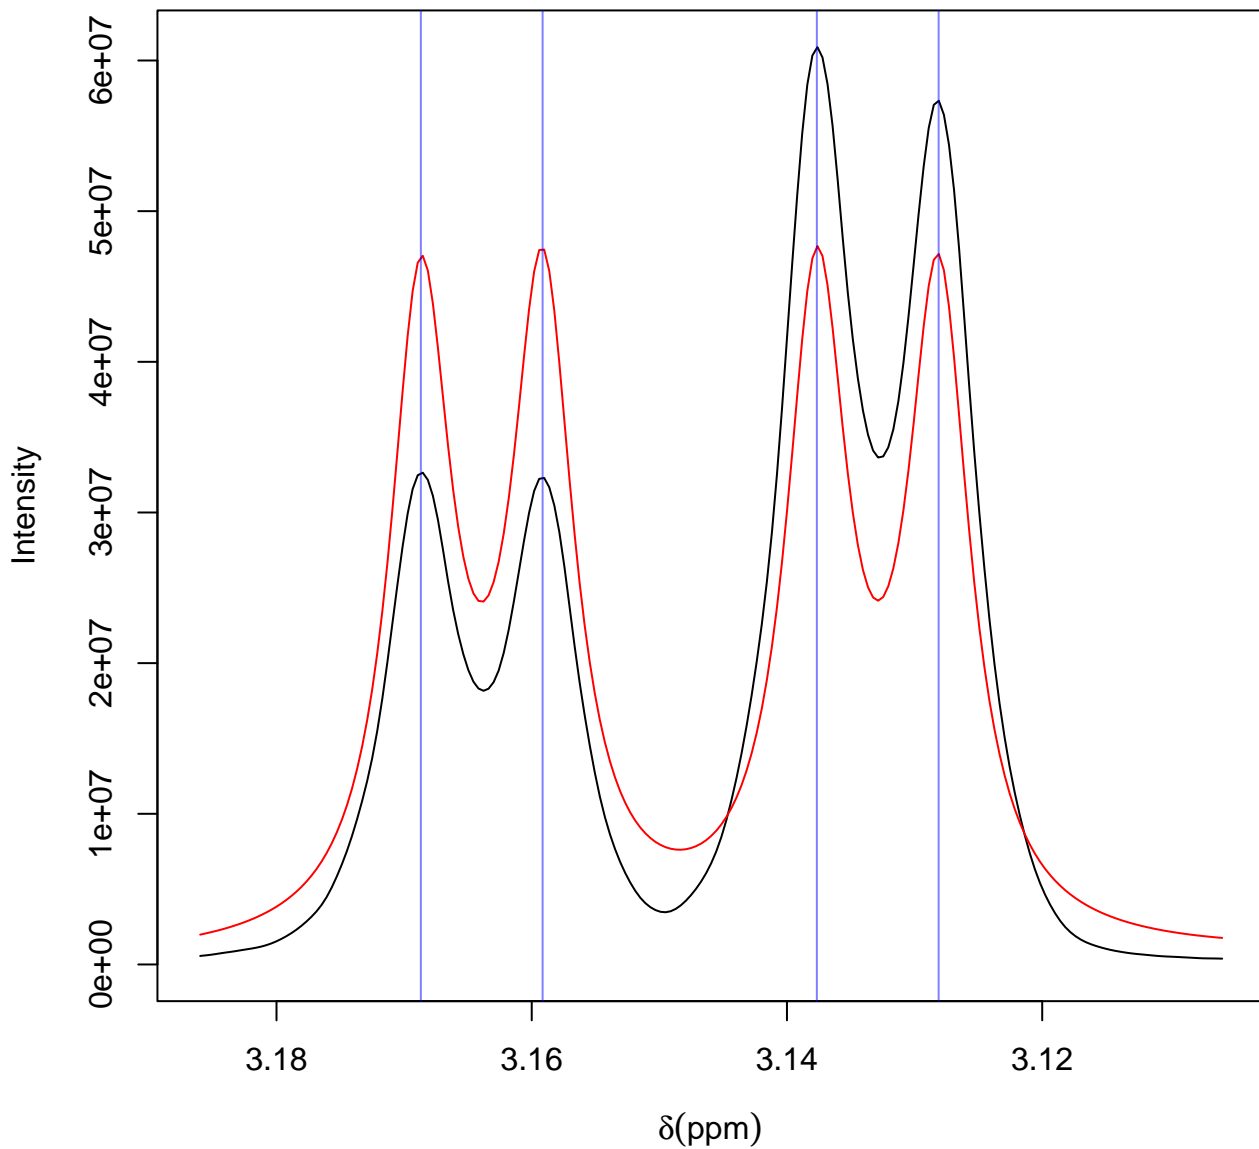

# HB3

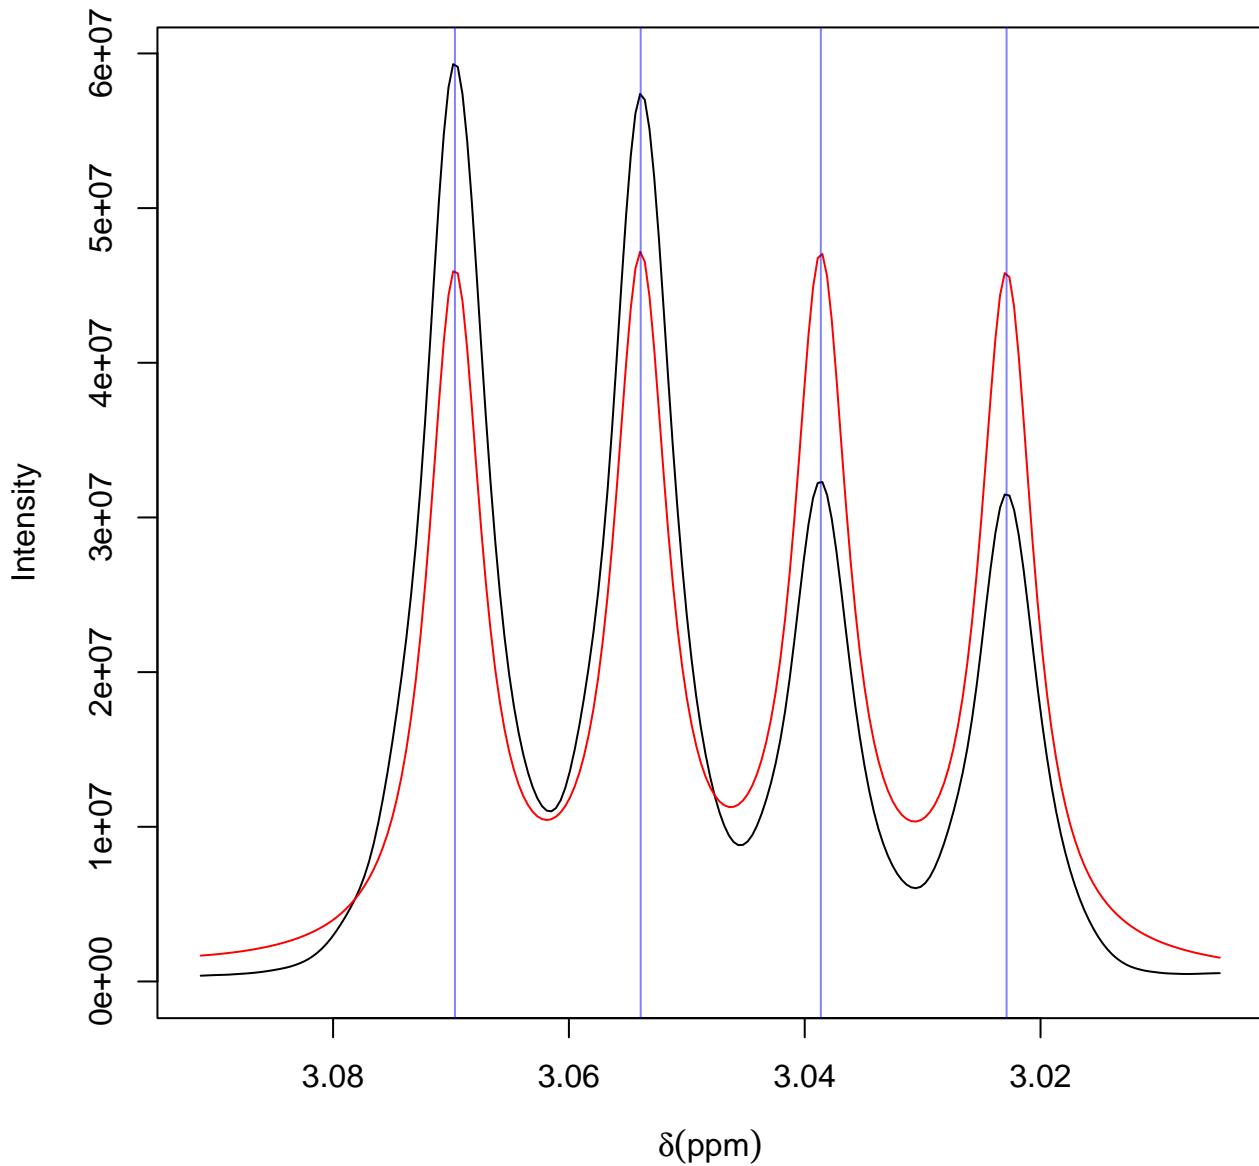

# HD2

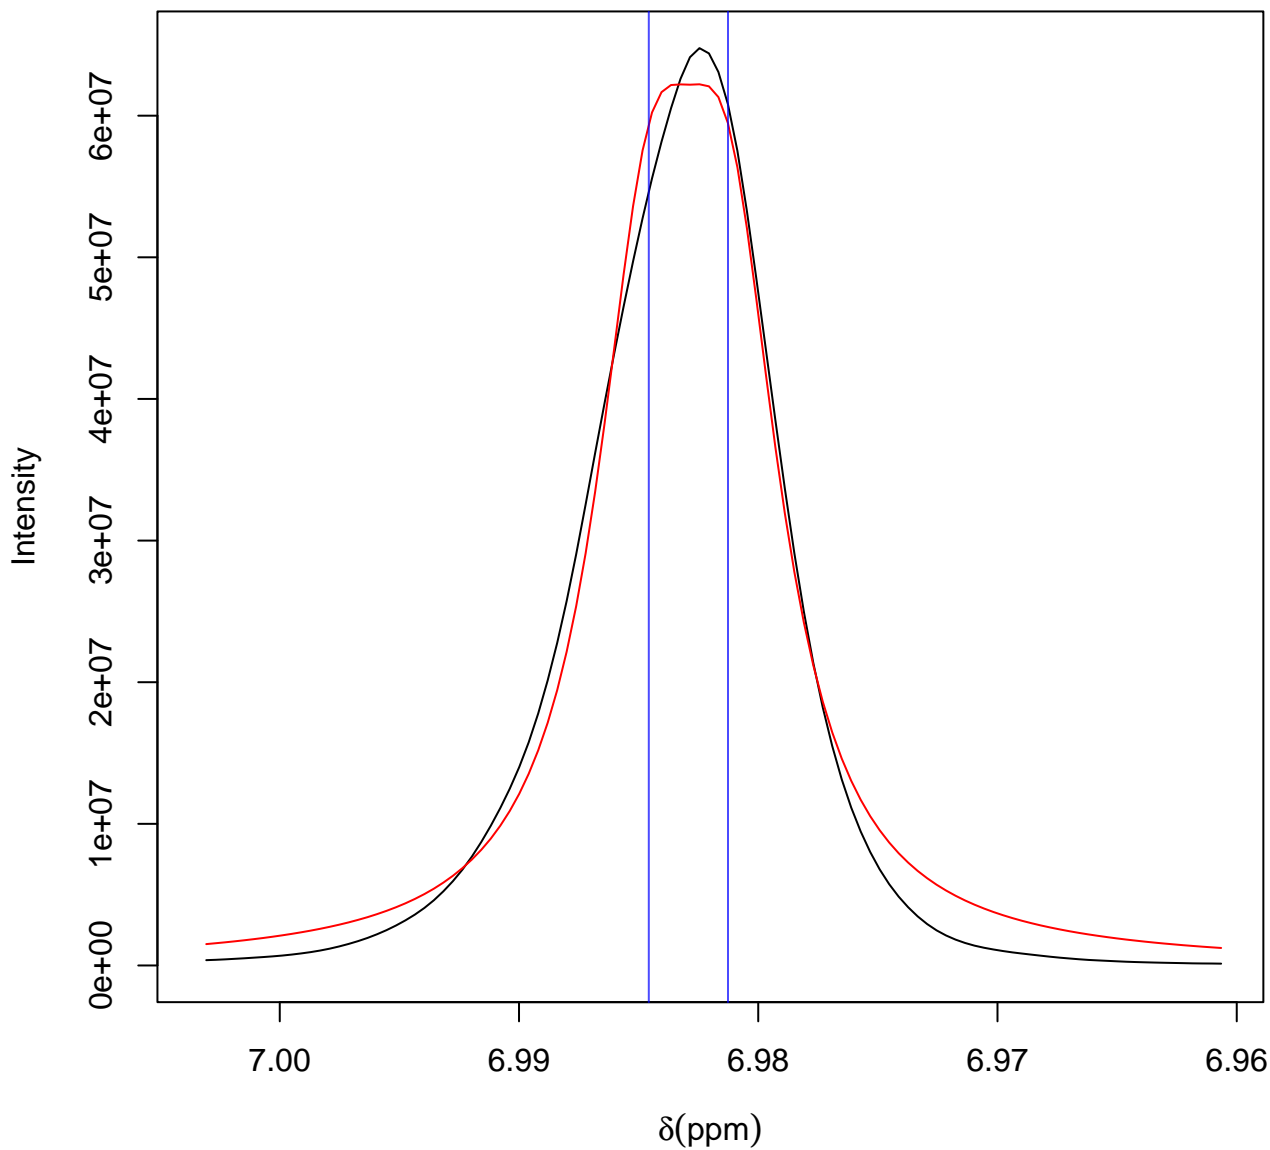

HE1

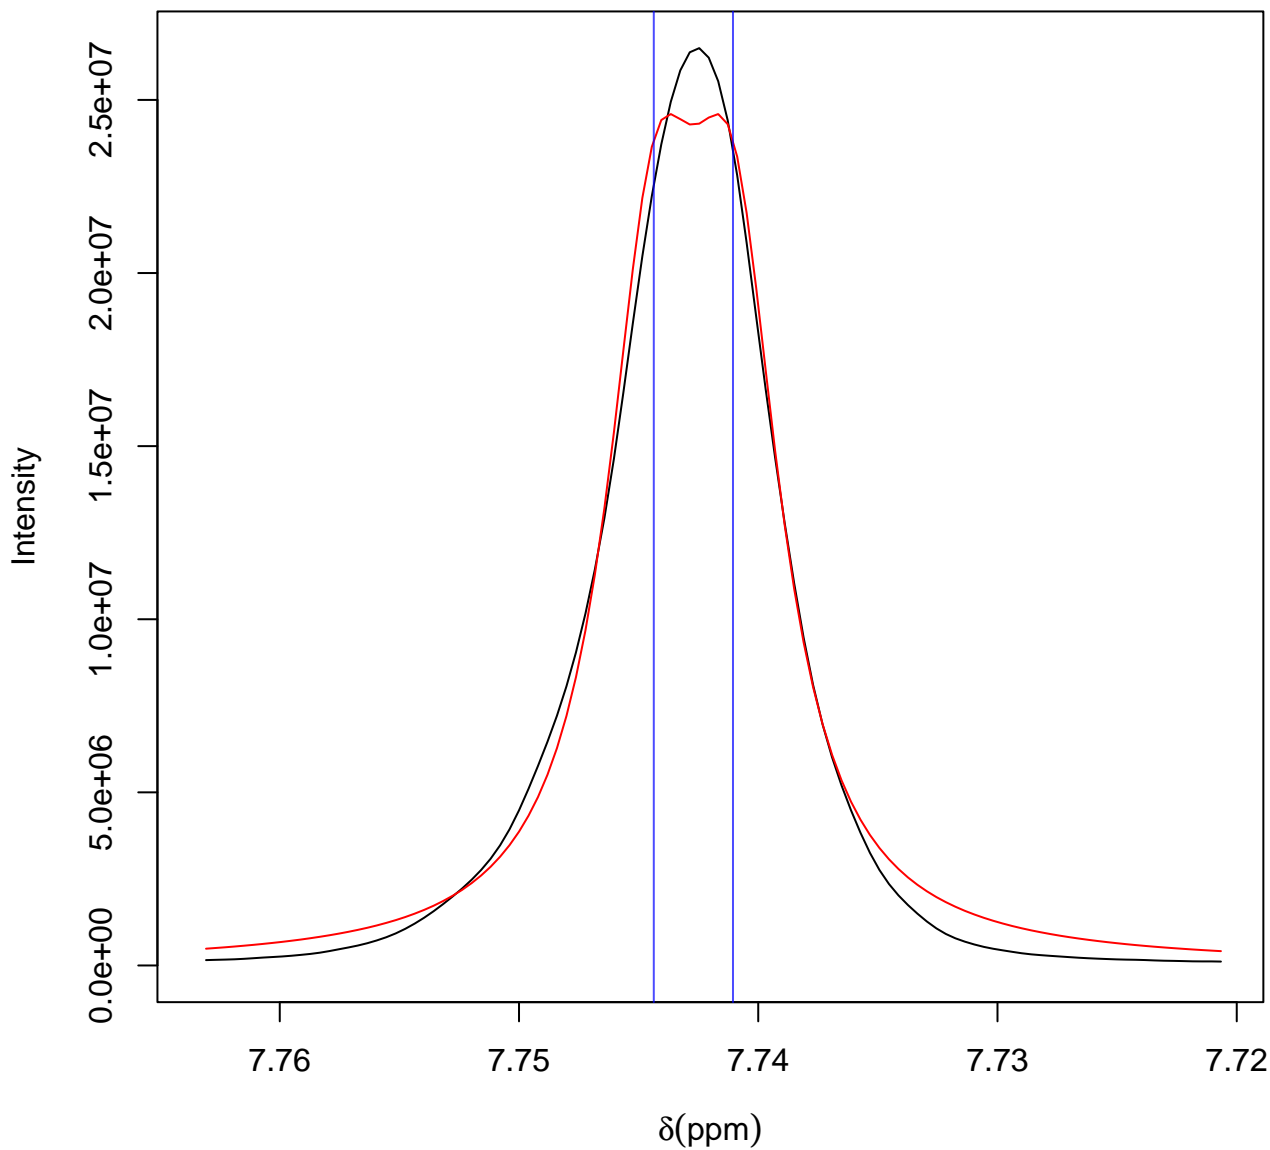

Supplement: Supplementary file 42 [file mr-2024-7-supplement.zip]

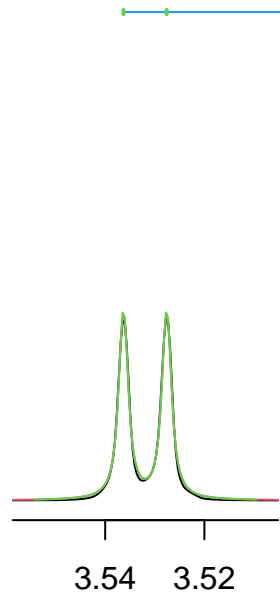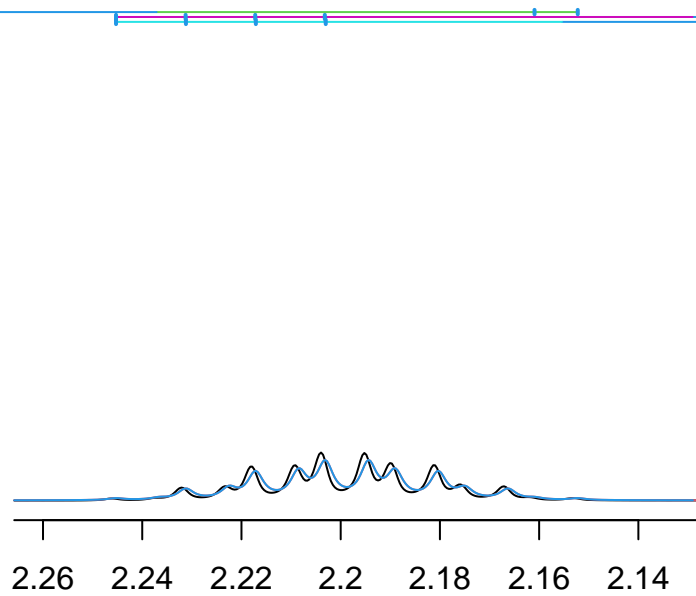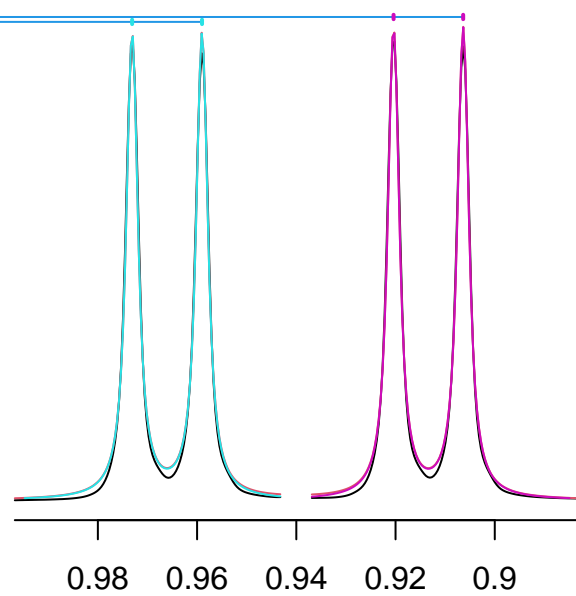

Supplement: Supplementary file 43 [file mr-2024-7-supplement.zip]
